# Supplementary material for: Stereoselective synthesis of (E)-α,β-unsaturated esters: triethylamine-catalyzed allylic rearrangement of enol phosphates
Source: Royal Society of Chemistry journal article supplement (doi:10.1039/d3ra02430j), 2023-01-01
Supplement: d3ra02430j1.pdf [file d3ra02430j1.pdf]

## Supporting Information

### **Stereoselective Synthesis of (E)- $\alpha,\beta$ -Unsaturated Esters: Triethylamine-Catalyzed Allylic Rearrangement of Enol Phosphates**

Yulong Zhang, Huichuang Guo, Qian Wu, Xiaojing Bi\*, Enxue Shi\*, and Junhua Xiao\*

The corresponding authors: State Key Laboratory of NBC Protection for Civilian, Beijing 102205, P. R. China

E-mail: xiao.junhua@pku.edu.cn; exshi@sina.com; xiaojingbimail@yeah.net

## Table of Contents

|                                                                                      |    |
|--------------------------------------------------------------------------------------|----|
| General information.....                                                             | 3  |
| General procedure for synthesis of EPs <b>4</b> .....                                | 4  |
| General procedure for synthesis of $\alpha,\beta$ -unsaturated esters <b>6</b> ..... | 8  |
| Synthesis of the (Z) and (E) isomers of <b>6a</b> using 2-chloroacetoacetate .....   | 15 |
| Spectra of products <b>4</b> & <b>6</b> .....                                        | 16 |
| X-ray crystal structure of product <b>4f</b> .....                                   | 53 |

## General information

All reactions were carried out in oven-dried glassware with magnetic stirring bar. Dry solvents (THF, toluene, CH<sub>3</sub>CN and DCM) were obtained by solvent purification system under argon. All commercially available reagents were used as received without further purification. Purification of products was carried out by flash column chromatography using silica gel 60 (230-400 mesh). Analytical thin layer chromatography was performed on 0.25 mm aluminum-backed silica gel 60-F plates. Visualization was accompanied with UV light and KMnO<sub>4</sub> solution. Concentration under reduced pressure refers to the removal of volatiles using a rotary evaporator attached to a dry diaphragm pump (10-15 mm Hg) followed by pumping to a constant weight with an oil pump (< 300 mTorr). High-resolution mass spectra (HRMS) were recorded on LCMS-IT-TOF mass spectrometer using ESI (electrospray ionization) or APCI (Atmospheric Pressure Chemical Ionization). <sup>1</sup>H NMR spectra were recorded in CDCl<sub>3</sub> on 600 MHz and 300 MHz NMR spectrometer. The <sup>1</sup>H chemical shifts are referenced to residual solvent signals at  $\delta$  7.26 (CHCl<sub>3</sub>) or  $\delta$  0.00 (TMS). <sup>1</sup>H NMR coupling constants (*J*) are reported in Hertz (Hz) and multiplicities are indicated as follows: s (singlet), app s (apparent singlet), bs (broad singlet), d (doublet), t (triplet), q (quartet), m (multiplet), dd (doublet of doublets), dt (doublet of triplets), td (triplet of doublets), tt (triplet of triplets). <sup>13</sup>C NMR spectra were proton decoupled and recorded in CDCl<sub>3</sub> on 151 MHz and 75 MHz NMR spectrometer. The <sup>13</sup>C chemical shifts are referenced to solvent signals at  $\delta$  77.16 (CDCl<sub>3</sub>). <sup>31</sup>P NMR spectra were proton decoupled and recorded in CDCl<sub>3</sub> on 243 MHz and 122 MHz NMR spectrometer.

## General procedure for synthesis of EPs **4**

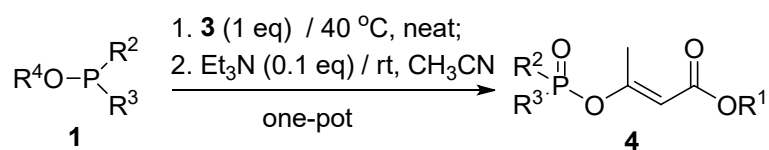

To an oven dried 10 mL test tube with a stir bar was added phosphite **1** (1.0 equiv, 1.0 mmol) and 4-chloroacetoacetate **3** (1.0 equiv, 1.0 mmol). After stirring for 2 h at 40 °C, the reaction mixture was then cooled to room temperature followed by the addition of a solution of triethylamine (10 mol%) and 3 mL of dry CH<sub>3</sub>CN. After stirring for 12 h at room temperature, the resulting mixture was concentrated to give the crude product which was then purified by column chromatography on silica gel (PE/EA = 1:1) to afford the product of conjugated *E*-β-phosphoroxylated α,β-unsaturated ester **4**.

### **(*E*)-ethyl 3-((diethoxyphosphoryl)oxy)but-2-enoate (**4a**):**

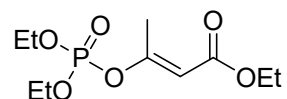

92% yield, brown oil.  $R_f = 0.45$  (PE/EA = 1:1). <sup>1</sup>H NMR (600 MHz, CDCl<sub>3</sub>) δ 5.77 (s, 1H), 4.38–3.87 (m, 6H), 2.36 (s, 3H), 1.34 (t,  $J = 7.1$  Hz, 6H), 1.24 (t,  $J = 7.1$  Hz, 3H); <sup>13</sup>C NMR (151 MHz, CDCl<sub>3</sub>) δ 166.28, 163.14 (d,  $J = 6.0$  Hz), 106.06 (d,  $J = 4.5$  Hz), 64.74 (d,  $J = 7.5$  Hz), 60.06, 18.49, 18.46. <sup>31</sup>P NMR (243 MHz, CDCl<sub>3</sub>) δ -8.14; HRMS (ESI-MS) [M+H]<sup>+</sup>: found 267.0909; calculated for C<sub>10</sub>H<sub>20</sub>O<sub>6</sub>P: 267.0919.

### **(*E*)-ethyl 3-((diisopropoxyphosphoryl)oxy)but-2-enoate (**4b**):**

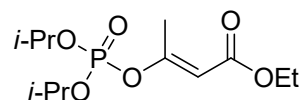

96% yield, brown oil.  $R_f = 0.32$  (PE/EA = 1:1). <sup>1</sup>H NMR (300 MHz, CDCl<sub>3</sub>) δ 5.71 (s, 1H), 4.76–4.43 (m, 2H), 4.19–3.85 (m, 2H), 2.30 (s, 3H), 1.28 (s, 12H), 1.21–1.07 (m, 3H); <sup>13</sup>C NMR (75 MHz, CDCl<sub>3</sub>) δ 166.34, 163.71–162.66 (m), 105.67 (d,  $J = 5.1$  Hz), 73.73 (d,  $J = 6.2$  Hz), 59.91, 24.39–22.12 (m), 18.48 (d,  $J = 4.6$  Hz), 14.15; <sup>31</sup>P NMR (121 MHz, CDCl<sub>3</sub>) δ -9.94; HRMS (ESI-MS) [M+H]<sup>+</sup>: found 295.127; calculated for C<sub>12</sub>H<sub>24</sub>O<sub>6</sub>P: 295.1232.

**(E)-ethyl 3-((dibutoxyphosphoryl)oxy)but-2-enoate (4c):**

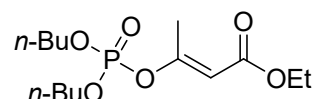

90% yield, colorless oil,  $R_f = 0.52$  (PE/EA= 1:1).  $^1\text{H}$  NMR (300 MHz,  $\text{CDCl}_3$ )  $\delta$  5.72 (s, 1H), 4.45–3.70 (m, 6H), 2.59–1.96 (m, 3H), 1.70–1.53 (m, 4H), 1.42–1.26 (m, 4H), 1.23–1.12 (m, 3H), 0.95–0.75 (m, 6H);  $^{13}\text{C}$  NMR (75 MHz,  $\text{CDCl}_3$ )  $\delta$  166.23, 163.16 (d,  $J = 8.2$  Hz), 110.93–99.91 (m), 68.36 (d,  $J = 6.3$  Hz), 59.99, 32.06 (d,  $J = 6.9$  Hz), 18.54, 18.42 (d,  $J = 5.2$  Hz), 14.15, 13.45;  $^{31}\text{P}$  NMR (121 MHz,  $\text{CDCl}_3$ )  $\delta$  -7.94; HRMS (ESI-MS)  $[\text{M}+\text{H}]^+$ : found 323.1549; calculated for  $\text{C}_{14}\text{H}_{28}\text{O}_6\text{P}$ : 323.1545.

**(E)-ethyl 3-(((diethylamino)(isopropoxy)phosphoryl)oxy)but-2-enoate (4d):**

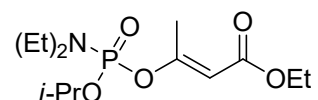

90% yield, colorless oil.  $R_f = 0.44$  (PE/EA= 1:1).  $^1\text{H}$  NMR (300 MHz,  $\text{CDCl}_3$ )  $\delta$  5.82 (s, 1H), 4.29–3.91 (m, 2H), 3.68 (d,  $J = 11.6$  Hz, 3H), 3.41 (dp,  $J = 20.2, 6.7$  Hz, 2H), 2.33 (s, 3H), 1.20 (d,  $J = 6.8$  Hz, 15H);  $^{13}\text{C}$  NMR (75 MHz,  $\text{CDCl}_3$ )  $\delta$  166.86, 164.05 (d,  $J = 8.7$  Hz), 105.01 (d,  $J = 5.3$  Hz), 59.80, 52.89 (d,  $J = 5.8$  Hz), 46.38 (d,  $J = 4.9$  Hz), 22.37 (d,  $J = 26.2$  Hz), 18.81 (d,  $J = 5.2$  Hz), 14.25;  $^{31}\text{P}$  NMR (121 MHz,  $\text{CDCl}_3$ )  $\delta$  3.32; HRMS (ESI-MS)  $[\text{M}+\text{H}]^+$ : found 308.1552; calculated for  $\text{C}_{13}\text{H}_{27}\text{NO}_5\text{P}$ : 308.1549.

**(E)-ethyl 3-((methoxy(phenyl)phosphoryl)oxy)but-2-enoate (4e):**

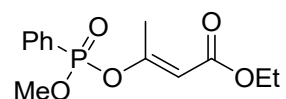

96% yield, white solid, **m.p.** = 98–108 °C,  $R_f = 0.36$  (PE/EA= 1:1).  $^1\text{H}$  NMR (600 MHz,  $\text{CDCl}_3$ )  $\delta$  7.80 (dd,  $J = 13.9, 8.1$  Hz, 2H), 7.57 (t,  $J = 7.5$  Hz, 1H), 7.51–7.41 (m, 2H), 5.77 (s, 1H), 4.08 (q,  $J = 7.1$  Hz, 2H), 3.81 (d,  $J = 11.5$  Hz, 3H), 2.33 (s, 3H), 1.20 (t,  $J = 7.1$  Hz, 3H);  $^{13}\text{C}$  NMR (151 MHz,  $\text{CDCl}_3$ )  $\delta$  166.26, 163.23 (d,  $J = 8.7$  Hz), 133.21 (d,  $J = 3.1$  Hz), 131.86 (d,  $J = 10.3$  Hz), 128.71 (d,  $J = 15.7$  Hz), 126.50 (d,  $J = 191.8$  Hz), 106.58 (d,  $J = 5.3$  Hz), 60.04, 53.12 (d,  $J = 5.9$  Hz), 18.99 (d,  $J = 4.1$  Hz), 14.18;  $^{31}\text{P}$  NMR (243 MHz,  $\text{CDCl}_3$ )  $\delta$  15.95; HRMS (ESI-MS)  $[\text{M}+\text{H}]^+$ : found 285.085; calculated for  $\text{C}_{13}\text{H}_{18}\text{O}_5\text{P}$ : 285.0814.

**(E)-ethyl 3-((diphenylphosphoryl)oxy)but-2-enoate (4f):**

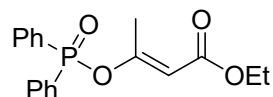

90% yield, white solid, **m.p.** = 99–104 °C,  $R_f$  = 0.34 (PE/EA = 1:1).  $^1\text{H}$  NMR (600 MHz,  $\text{CDCl}_3$ )  $\delta$  7.84–7.80 (m, 4H), 7.56–7.54 (m, 2H), 7.48–7.45 (m, 4H), 5.88 (s, 1H), 4.07 (q,  $J$  = 7.1 Hz, 2H), 2.39 (s, 3H), 1.20 (t,  $J$  = 7.1 Hz, 3H);  $^{13}\text{C}$  NMR (151 MHz,  $\text{CDCl}_3$ )  $\delta$  166.39, 163.77 (d,  $J$  = 9.7 Hz), 132.72 (d,  $J$  = 2.7 Hz), 131.54 (d,  $J$  = 10.5 Hz), 130.62 (d,  $J$  = 138.3 Hz), 128.74 (d,  $J$  = 13.6 Hz), 106.58 (d,  $J$  = 5.8 Hz), 59.99, 19.41 (d,  $J$  = 4.3 Hz), 14.18;  $^{31}\text{P}$  NMR (243 MHz,  $\text{CDCl}_3$ )  $\delta$  30.29; HRMS (ESI-MS)  $[\text{M}+\text{H}]^+$ : found 331.1028; calculated for  $\text{C}_{18}\text{H}_{20}\text{O}_4\text{P}$ : 331.1021.

**(E)-ethyl 3-((dimethoxyphosphoryl)oxy)but-2-enoate (4g):**

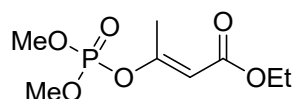

90% yield, slightly yellow oil.  $R_f$  = 0.38 (PE/EA = 1:1).  $^1\text{H}$  NMR (600 MHz,  $\text{CDCl}_3$ )  $\delta$  5.73 (s, 1H), 4.09 (q,  $J$  = 6.8 Hz, 2H), 3.78 (d,  $J$  = 12.2 Hz, 6H), 2.34 (s, 3H), 1.21 (t,  $J$  = 7.1 Hz, 3H);  $^{13}\text{C}$  NMR (151 MHz,  $\text{CDCl}_3$ )  $\delta$  166.07, 162.90 (d,  $J$  = 7.5 Hz), 109.99, 106.25 (d,  $J$  = 6.0 Hz), 60.09, 54.91 (d,  $J$  = 7.5 Hz), 18.33 (d,  $J$  = 4.5 Hz), 14.13;  $^{31}\text{P}$  NMR (243 MHz,  $\text{CDCl}_3$ )  $\delta$  -5.93; HRMS (ESI-MS)  $[\text{M}+\text{H}]^+$ : found 239.0609; calculated for  $\text{C}_8\text{H}_{16}\text{O}_6\text{P}$ : 239.0606.

**(E)-methyl 3-((diethoxyphosphoryl)oxy)but-2-enoate (4h):**

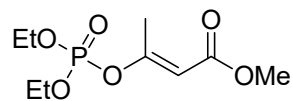

92% yield, colorless oil,  $R_f$  = 0.34 (PE/EA = 1:1).  $^1\text{H}$  NMR (600 MHz,  $\text{CDCl}_3$ )  $\delta$  5.80 (s, 1H), 4.18 (p,  $J$  = 7.3 Hz, 4H), 3.68 (s, 3H), 2.38 (s, 3H), 1.35 (t,  $J$  = 7.1 Hz, 6H);  $^{13}\text{C}$  NMR (151 MHz,  $\text{CDCl}_3$ )  $\delta$  166.74, 163.45 (d,  $J$  = 7.5 Hz), 105.61 (d,  $J$  = 6.0 Hz), 64.78 (d,  $J$  = 7.5 Hz), 51.27, 18.51 (d,  $J$  = 6.0 Hz), 16.01 (d,  $J$  = 6.0 Hz);  $^{31}\text{P}$  NMR (243 MHz,  $\text{CDCl}_3$ )  $\delta$  -8.17; HRMS (ESI-MS)  $[\text{M}+\text{H}]^+$ : found 253.0768; calculated for  $\text{C}_9\text{H}_{18}\text{O}_6\text{P}$ : 253.0763.

**(E)-isopropyl 3-((diethoxyphosphoryl)oxy)but-2-enoate (4i):**

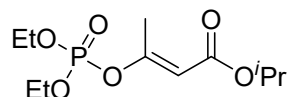

95% yield, colorless oil, R<sub>f</sub> = 0.34 (PE/EA= 1:1). <sup>1</sup>H NMR (300 MHz, CDCl<sub>3</sub>) δ 5.67 (s, 1H), 4.92 (p, J = 6.2 Hz, 1H), 4.10 (p, J = 7.2 Hz, 4H), 2.29 (s, 3H), 1.27 (t, J = 7.1 Hz, 6H), 1.14 (d, J = 6.3 Hz, 6H); <sup>13</sup>C NMR (75 MHz, CDCl<sub>3</sub>) δ 165.72, 162.80 (d, J = 8.4 Hz), 106.47 (d, J = 5.1 Hz), 67.30, 64.68 (d, J = 6.2 Hz), 21.78, 18.40 (d, J = 5.1 Hz), 15.96 (d, J = 6.7 Hz); <sup>31</sup>P NMR (243 MHz, CDCl<sub>3</sub>) δ -8.20; HRMS (ESI-MS) [M+H]<sup>+</sup>: found 281.1079; calculated for C<sub>11</sub>H<sub>22</sub>O<sub>6</sub>P: 281.1076.

**(E)-tert-butyl 3-((diethoxyphosphoryl)oxy)but-2-enoate (4j):**

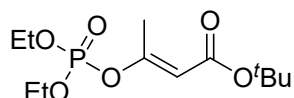

93% yield, colorless oil, R<sub>f</sub> = 0.54 (PE/EA= 1:1). <sup>1</sup>H NMR (600 MHz, CDCl<sub>3</sub>) δ 5.68 (s, 1H), 4.14 (p, J = 7.4 Hz, 4H), 2.31 (s, 3H), 1.41 (s, 9H), 1.32 (t, J = 7.1 Hz, 6H); <sup>13</sup>C NMR (151 MHz, CDCl<sub>3</sub>) δ 165.56, 162.02 (d, J = 9.0 Hz), 107.84 (d, J = 4.5 Hz), 80.31, 64.63 (d, J = 6.0 Hz), 28.12, 18.27 (d, J = 4.5 Hz), 15.95; <sup>31</sup>P NMR (243 MHz, CDCl<sub>3</sub>) δ -8.09; HRMS (ESI-MS) [M+H]<sup>+</sup>: found 295.1235; calculated for C<sub>12</sub>H<sub>24</sub>O<sub>6</sub>P: 295.1232.

**(E)-benzyl 3-((diethoxyphosphoryl)oxy)but-2-enoate (4k):**

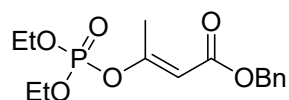

94% yield, colorless oil, R<sub>f</sub> = 0.60 (PE/EA= 1:1). <sup>1</sup>H NMR (600 MHz, CDCl<sub>3</sub>) δ 7.37–7.28 (m, 5H), 5.86 (s, 1H), 5.13 (s, 2H), 4.17 (t, J = 7.6 Hz, 4H), 2.40 (s, 3H), 1.35 (t, J = 7.1 Hz, 6H); <sup>13</sup>C NMR (151 MHz, CDCl<sub>3</sub>) δ 166.11, 163.78, 135.94, 128.50, 128.15, 105.69 (d, J = 6.0 Hz), 65.96, 64.80 (d, J = 6.0 Hz), 18.61 (d, J = 4.5 Hz), 16.02 (d, J = 6.0 Hz); <sup>31</sup>P NMR (243 MHz, CDCl<sub>3</sub>) δ -8.22; HRMS (ESI-MS) [M+H]<sup>+</sup>: found 329.2978; calculated for C<sub>15</sub>H<sub>22</sub>O<sub>6</sub>P: 329.2974.

General procedure for synthesis of  $\alpha,\beta$ -unsaturated esters **6**

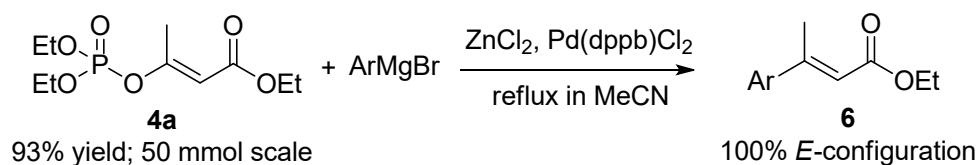

ArMgBr (1.5 mmol) was added to a stirred suspension of ZnCl<sub>2</sub> (1.5 mmol) in CH<sub>3</sub>CN (3.0 mL) at 0–5 °C under N<sub>2</sub> atmosphere. The mixture was stirred at the same temperature for 0.5 h, then the  $\beta$ -phosphoroxylated  $\alpha,\beta$ -unsaturated ester **4a** (1 mmol) in CH<sub>3</sub>CN (5 mL) and Pd(dppb)Cl<sub>2</sub> (0.02 mmol) in CH<sub>3</sub>CN (0.5 mL) were successively added and stirred at 60 °C for 2 h. After cooling down, aq. 1 M HCl solution was added to the mixture which was extracted twice with AcOEt. The combined organic phase was washed with brine, dried (Na<sub>2</sub>SO<sub>4</sub>) and concentrated. The obtained crude product was then purified by SiO<sub>2</sub>-column chromatography (hexane/AcOEt = 100:0 - 10:1) to give the desired product (*E*)-**6**.

**(*E*)-ethyl 3-phenylbut-2-enoate (6a):**

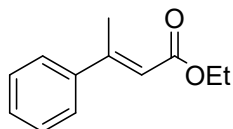

84% yield, colorless oil, R<sub>f</sub> = 0.59 (PE/EA= 10:1). <sup>1</sup>H NMR (300 MHz, CDCl<sub>3</sub>)  $\delta$  7.47 (s, 2H), 7.36 (s, 3H), 6.14 (s, 1H), 4.22 (q, *J* = 7.0 Hz, 2H), 2.59 (s, 3H), 1.32 (t, *J* = 7.1 Hz, 3H); <sup>13</sup>C NMR (75 MHz, CDCl<sub>3</sub>)  $\delta$  166.90, 155.56, 142.22, 129.01, 128.51, 126.32, 117.18, 59.88, 17.97, 14.39; HRMS (ESI-MS) [M+H]<sup>+</sup>: found 191.0998; calculated for C<sub>12</sub>H<sub>15</sub>O<sub>2</sub>: 191.0994.

**(*E*)-ethyl 3-(*p*-tolyl)but-2-enoate (6b):**

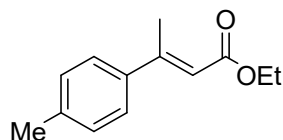

80% yield, colorless oil, R<sub>f</sub> = 0.42 (PE/EA= 10:1). <sup>1</sup>H NMR (300 MHz, CDCl<sub>3</sub>)  $\delta$  7.40 (d, *J* = 8.2 Hz, 2H), 7.18 (d, *J* = 8.0 Hz, 2H), 6.14 (s, 1H), 4.22 (q, *J* = 7.1 Hz, 2H), 2.58 (d, *J* = 1.2 Hz, 3H), 2.37 (s, 3H), 1.32 (t, *J* = 7.1 Hz, 3H); <sup>13</sup>C NMR (75 MHz, CDCl<sub>3</sub>)  $\delta$  167.04, 155.47, 139.23,



129.21, 126.24, 116.27, 59.81, 21.23, 17.83, 14.40; HRMS (ESI-MS)  $[M+H]^+$ : found 221.1095; calculated for  $C_{13}H_{16}O_3$ : 221.1099.

**(E)-ethyl 3-(m-tolyl)but-2-enoate (6c):**

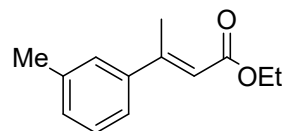

93% yield, colorless oil,  $R_f = 0.34$  (PE/EA= 20:1).  $^1H$  NMR (300 MHz,  $CDCl_3$ )  $\delta$  7.48–6.79 (m, 5H), 6.12 (s, 1H), 4.45–4.00 (m, 2H), 2.57 (s, 3H), 2.37 (s, 3H), 1.31 (t,  $J = 7.1$  Hz, 3H);  $^{13}C$  NMR (75 MHz,  $CDCl_3$ )  $\delta$  166.95, 155.80, 142.25, 138.11, 129.76, 128.40, 127.04, 123.47, 116.95, 59.84, 21.50, 18.01, 14.39; HRMS (ESI-MS)  $[M+H]^+$ : found 205.2645; calculated for  $C_{13}H_{17}O_2$ : 205.2649.

**(E)-ethyl 3-(o-tolyl)but-2-enoate (6d):**

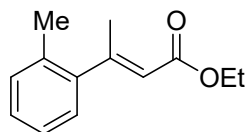

88% yield, colorless oil,  $R_f = 0.72$  (PE/EA= 20:1).  $^1H$  NMR (300 MHz,  $CDCl_3$ )  $\delta$  7.36–6.85 (m, 4H), 5.76 (s, 1H), 4.20 (q,  $J = 7.1$  Hz, 2H), 2.45 (d,  $J = 1.3$  Hz, 3H), 2.28 (s, 3H), 1.30 (t,  $J = 7.1$  Hz, 3H);  $^{13}C$  NMR (75 MHz,  $CDCl_3$ )  $\delta$  166.66, 158.35, 143.92, 133.87, 130.42, 127.72, 127.10, 125.77, 119.41, 59.85, 20.85, 19.77, 14.37; HRMS (ESI-MS)  $[M+H]^+$ : found 205.1155; calculated for  $C_{13}H_{17}O_2$ : 205.1150.

**(E)-ethyl 3-(4-ethylphenyl)but-2-enoate (6e):**

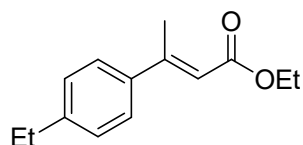

94% yield, colorless oil,  $R_f = 0.62$  (PE/EA= 20:1).  $^1H$  NMR (300 MHz,  $CDCl_3$ )  $\delta$  7.43 (d,  $J = 8.2$  Hz, 2H), 7.21 (d,  $J = 8.2$  Hz, 2H), 6.16 (s, 1H), 4.22 (q,  $J = 7.1$  Hz, 2H), 2.67 (q,  $J = 7.6$  Hz, 2H), 2.59 (d,  $J = 1.1$  Hz, 3H), 1.29 (dt,  $J = 21.6, 7.4$  Hz, 6H);  $^{13}C$  NMR (75 MHz,  $CDCl_3$ )  $\delta$  167.01,

155.45, 145.45, 139.48, 128.01, 126.32, 116.33, 77.51, 77.09, 76.67, 59.78, 28.59, 17.83, 15.45, 14.39; HRMS (ESI-MS)  $[M+H]^+$ : found 219.1309; calculated for  $C_{14}H_{19}O_2$ : 219.1307.

**(E)-ethyl 3-(4-(tert-butyl)phenyl)but-2-enoate (6f):**

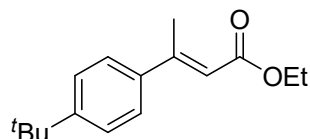

92% yield, colorless oil,  $R_f = 0.62$  (PE/EA= 10:1).  $^1H$  NMR (300 MHz,  $CDCl_3$ )  $\delta$  7.66–7.30 (m, 4H), 6.17 (s, 1H), 4.41–4.06 (m, 2H), 2.59 (s, 3H), 1.34 (s, 12H);  $^{13}C$  NMR (75 MHz,  $CDCl_3$ )  $\delta$  167.05, 155.34, 152.32, 139.07, 126.08, 125.45, 116.36, 59.80, 34.68, 31.37, 17.79, 14.41; HRMS (ESI-MS)  $[M+H]^+$ : found 247.1629; calculated for  $C_{16}H_{22}O_2$ : 247.1620.

**(E)-ethyl 3-([1,1'-biphenyl]-4-yl)but-2-enoate (6g):**

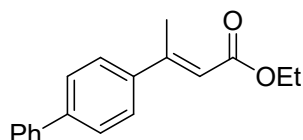

88% yield, colorless oil,  $R_f = 0.58$  (PE/EA= 10:1).  $^1H$  NMR (300 MHz,  $CDCl_3$ )  $\delta$  7.73–7.30 (m, 9H), 6.24 (s, 1H), 4.26 (q,  $J = 6.9$  Hz, 2H), 2.65 (s, 3H), 1.35 (t,  $J = 7.0$  Hz, 3H);  $^{13}C$  NMR (75 MHz,  $CDCl_3$ )  $\delta$  166.94, 154.96, 141.86, 140.95, 140.29, 128.91, 127.69, 127.19, 127.08, 126.82, 116.97, 59.93, 17.84, 14.43; HRMS (ESI-MS)  $[M+H]^+$ : found 267.1310; calculated for  $C_{18}H_{19}O_2$ : 267.1307.

**(E)-ethyl 3-(4-fluorophenyl)but-2-enoate (6h):**

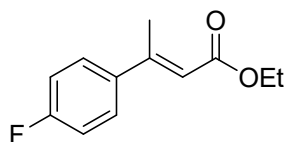

95% yield, colorless oil,  $R_f = 0.82$  (PE/EA= 10:1).  $^1H$  NMR (300 MHz,  $CDCl_3$ )  $\delta$  7.54–7.33 (m, 2H), 7.03 (t,  $J = 8.5$  Hz, 2H), 6.07 (s, 1H), 4.20 (q,  $J = 7.1$  Hz, 2H), 2.54 (s, 3H), 1.30 (t,  $J = 7.1$  Hz, 3H);  $^{13}C$  NMR (75 MHz,  $CDCl_3$ )  $\delta$  166.71, 164.84, 161.54, 154.22, 138.15, 128.15, 117.06,

115.56, 115.28, 59.90, 17.91, 14.33;  $^{19}\text{F}$  NMR (282 MHz,  $\text{CDCl}_3$ )  $\delta$  -105.69 – -118.10 (m); HRMS (ESI-MS)  $[\text{M}+\text{H}]^+$ : found 209.0888; calculated for  $\text{C}_{12}\text{H}_{14}\text{FO}_2$ : 209.0900.

**(E)-ethyl 3-(3-fluorophenyl)but-2-enoate (6i):**

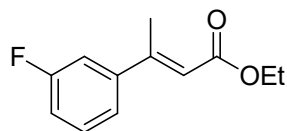

90% yield, colorless oil,  $R_f$  = 0.52 (PE/EA= 20:1).  $^1\text{H}$  NMR (300 MHz,  $\text{CDCl}_3$ )  $\delta$  7.42–7.29 (m, 1H), 7.25 (d,  $J$  = 7.9 Hz, 1H), 7.17 (d,  $J$  = 10.3 Hz, 1H), 7.05 (t,  $J$  = 8.2 Hz, 1H), 6.14 (s, 1H), 4.22 (q,  $J$  = 7.1 Hz, 2H), 2.56 (s, 3H), 1.32 (t,  $J$  = 7.1 Hz, 3H);  $^{13}\text{C}$  NMR (75 MHz,  $\text{CDCl}_3$ )  $\delta$  166.59, 164.40, 161.13, 154.77–152.61 (m), 144.41 (d,  $J$  = 7.3 Hz), 130.01 (d,  $J$  = 8.3 Hz), 121.98 (d,  $J$  = 2.8 Hz), 118.02, 115.79 (d,  $J$  = 21.2 Hz), 113.35 (d,  $J$  = 22.4 Hz), 60.03, 17.82, 14.33;  $^{19}\text{F}$  NMR (282 MHz,  $\text{CDCl}_3$ )  $\delta$  -112.70 – -112.87 (m); HRMS (ESI-MS)  $[\text{M}+\text{H}]^+$ : found 209.0905; calculated for  $\text{C}_{12}\text{H}_{14}\text{FO}_2$ : 209.0900.

**(E)-ethyl 3-(4-chlorophenyl)but-2-enoate (6j):**

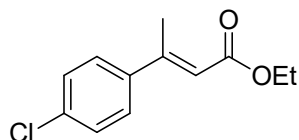

96% yield, colorless oil,  $R_f$  = 0.64 (PE/EA= 10:1).  $^1\text{H}$  NMR (300 MHz,  $\text{CDCl}_3$ )  $\delta$  7.48–7.28 (m, 4H), 6.11 (s, 1H), 4.21 (q,  $J$  = 7.1 Hz, 2H), 2.54 (s, 3H), 1.31 (t,  $J$  = 7.1 Hz, 3H);  $^{13}\text{C}$  NMR (75 MHz,  $\text{CDCl}_3$ )  $\delta$  166.67, 154.08, 140.52, 134.97, 128.70, 127.63, 117.49, 60.01, 17.82, 14.37; HRMS (ESI-MS)  $[\text{M}+\text{H}]^+$ : found 225.0600; calculated for  $\text{C}_{12}\text{H}_{13}\text{ClO}_2$ : 225.0604.

**(E)-ethyl 3-(4-methoxyphenyl)but-2-enoate (6k):**

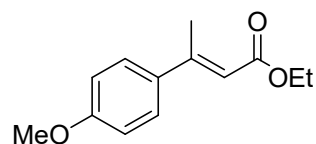

82% yield, colorless oil,  $R_f$  = 0.58 (PE/EA= 10:1).  $^1\text{H}$  NMR (300 MHz,  $\text{CDCl}_3$ )  $\delta$  7.46 (d,  $J$  = 8.6 Hz, 0H), 6.89 (d,  $J$  = 8.7 Hz, 0H), 6.11 (s, 1H), 4.21 (q,  $J$  = 7.1 Hz, 0H), 3.82 (s, 0H), 1.31 (t,  $J$  =

7.1 Hz, 0H);  $^{13}\text{C}$  NMR (75 MHz,  $\text{CDCl}_3$ )  $\delta$  167.11, 160.41, 154.92, 134.29, 127.73, 115.29, 113.81, 59.75, 55.35, 17.67, 14.40; HRMS (ESI-MS)  $[\text{M}+\text{H}]^+$ : found 221.1095; calculated for  $\text{C}_{13}\text{H}_{16}\text{O}_3$ : 221.1099.

**(E)-ethyl 3-(3-methoxyphenyl)but-2-enoate (6l):**

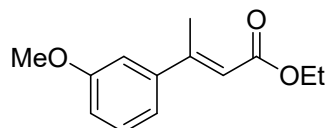

87% yield, colorless oil,  $R_f = 0.54$  (PE/EA= 10:1).  $^1\text{H}$  NMR (300 MHz,  $\text{CDCl}_3$ )  $\delta$  7.28 (t,  $J = 8.0$  Hz, 1H), 7.06 (d,  $J = 7.8$  Hz, 1H), 6.99 (s, 1H), 6.90 (d,  $J = 8.2$  Hz, 1H), 6.13 (s, 1H), 4.21 (q,  $J = 7.1$  Hz, 2H), 3.82 (s, 3H), 2.56 (s, 3H), 1.32 (t,  $J = 7.1$  Hz, 3H);  $^{13}\text{C}$  NMR (75 MHz,  $\text{CDCl}_3$ )  $\delta$  166.85, 159.57, 155.44, 143.72, 129.51, 118.78, 117.28, 114.33, 112.05, 59.91, 55.29, 18.05, 14.38; HRMS (ESI-MS)  $[\text{M}+\text{H}]^+$ : found 221.1103; calculated for  $\text{C}_{13}\text{H}_{17}\text{O}_3$ : 221.1099.

**(E)-ethyl 3-(2-methoxyphenyl)but-2-enoate (6m):**

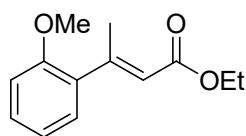

94% yield, colorless oil,  $R_f = 0.72$  (PE/EA= 20:1).  $^1\text{H}$  NMR (300 MHz,  $\text{CDCl}_3$ )  $\delta$  7.29 (p,  $J = 9.3$ , 8.7 Hz, 1H), 7.14 (d,  $J = 7.4$  Hz, 1H), 6.97–6.84 (m, 2H), 5.90 (s, 1H), 4.20 (q,  $J = 7.0$  Hz, 2H), 3.81 (s, 3H), 2.50 (s, 3H), 1.51–1.12 (m, 3H);  $^{13}\text{C}$  NMR (75 MHz,  $\text{CDCl}_3$ )  $\delta$  166.80, 156.71, 156.31, 133.06, 129.50, 128.82, 120.55, 119.25, 110.96, 59.75, 55.44, 19.90, 14.39; HRMS (ESI-MS)  $[\text{M}+\text{H}]^+$ : found 237.1415; calculated for  $\text{C}_{14}\text{H}_{21}\text{O}_3$ : 237.1412.

**(E)-ethyl 3-(3,5-dimethylphenyl)but-2-enoate (6n):**

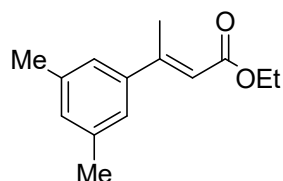

85% yield, colorless oil,  $R_f = 0.62$  (PE/EA= 10:1).  $^1\text{H}$  NMR (300 MHz,  $\text{CDCl}_3$ )  $\delta$  7.11 (s, 2H), 7.01 (s, 1H), 6.14 (s, 1H), 4.23 (q,  $J = 7.1$  Hz, 2H), 2.58 (s, 3H), 2.35 (s, 6H), 1.33 (t,  $J = 7.1$  Hz,

3H);  $^{13}\text{C}$  NMR (75 MHz,  $\text{CDCl}_3$ )  $\delta$  166.99, 156.03, 142.30, 138.00, 130.67, 124.21, 116.74, 59.81, 21.36, 18.05, 14.40; HRMS (ESI-MS)  $[\text{M}+\text{H}]^+$ : found 219.1310; calculated for  $\text{C}_{14}\text{H}_{19}\text{O}_2$ : 219.1307.

**(E)-ethyl 3-(2,5-dimethylphenyl)but-2-enoate (6o):**

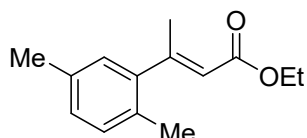

90% yield, colorless oil,  $R_f = 0.57$  (PE/EA= 10:1).  $^1\text{H}$  NMR (300 MHz,  $\text{CDCl}_3$ )  $\delta$  7.05 (q,  $J = 7.8$  Hz, 2H), 6.90 (s, 1H), 5.76 (s, 1H), 4.22 (q,  $J = 7.1$  Hz, 2H), 2.44 (s, 3H), 2.31 (s, 3H), 2.25 (s, 3H), 1.32 (t,  $J = 7.1$  Hz, 3H);  $^{13}\text{C}$  NMR (75 MHz,  $\text{CDCl}_3$ )  $\delta$  166.74, 158.56, 143.79, 135.21, 130.72, 130.34, 128.39, 127.76, 119.21, 59.83, 20.89, 19.28, 14.37; HRMS (ESI-MS)  $[\text{M}+\text{H}]^+$ : found 219.1304; calculated for  $\text{C}_{14}\text{H}_{19}\text{O}_2$ : 219.1307.

**(E)-ethyl 3-(naphthalen-1-yl)but-2-enoate (6p):**

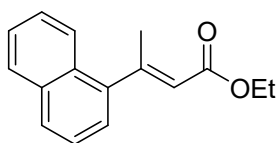

92% yield, colorless oil,  $R_f = 0.49$  (PE/EA= 10:1).  $^1\text{H}$  NMR (300 MHz,  $\text{CDCl}_3$ )  $\delta$  7.99–7.78 (m, 3H), 7.48 (dd,  $J = 18.1, 5.7$  Hz, 3H), 7.31 (d,  $J = 6.9$  Hz, 1H), 6.03 (s, 1H), 4.29 (q,  $J = 7.1$  Hz, 2H), 2.67 (s, 3H), 1.36 (t,  $J = 7.1$  Hz, 3H);  $^{13}\text{C}$  NMR (75 MHz,  $\text{CDCl}_3$ )  $\delta$  166.67, 157.18, 142.12, 133.71, 130.08, 128.51, 128.20, 126.33, 126.02, 125.38, 125.28, 124.25, 120.62, 60.00, 21.76, 14.42; HRMS (ESI-MS)  $[\text{M}+\text{H}]^+$ : found 241.1150; calculated for  $\text{C}_{16}\text{H}_{17}\text{O}_2$ : 241.1150.

**(E)-ethyl 3-(naphthalen-2-yl)but-2-enoate (6q):**

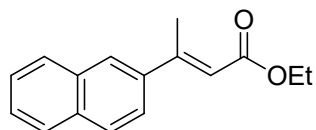

89% yield, colorless oil,  $R_f = 0.69$  (PE/EA= 10:1).  $^1\text{H}$  NMR (300 MHz,  $\text{CDCl}_3$ )  $\delta$  7.96 (s, 1H), 7.92 – 7.76 (m, 3H), 7.61 (dd,  $J = 8.6, 1.8$  Hz, 1H), 7.52 (dt,  $J = 6.3, 3.2$  Hz, 2H), 6.31 (s, 1H),

4.26 (q,  $J = 7.1$  Hz, 2H), 2.71 (s, 3H), 1.36 (t,  $J = 7.1$  Hz, 3H);  $^{13}\text{C}$  NMR (75 MHz,  $\text{CDCl}_3$ )  $\delta$  166.95, 155.30, 139.33, 133.49, 133.12, 128.54, 128.17, 127.61, 126.73, 126.54, 125.98, 123.98, 117.51, 59.96, 17.95, 14.44; HRMS (ESI-MS)  $[\text{M}+\text{H}]^+$ : found 241.1153; calculated for  $\text{C}_{16}\text{H}_{17}\text{O}_2$ : 241.1150.

**(*E*)-ethyl 3-(thiophen-2-yl)but-2-enoate (6r):**

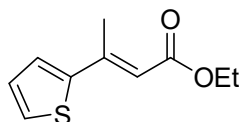

85% yield, colorless oil,  $R_f = 0.70$  (PE/EA = 10:1).  $^1\text{H}$  NMR (300 MHz,  $\text{CDCl}_3$ )  $\delta$  7.30 (d,  $J = 4.2$  Hz, 2H), 7.12–6.96 (m, 1H), 6.25 (s, 1H), 4.19 (q,  $J = 7.1$  Hz, 2H), 2.60 (s, 3H), 1.30 (t,  $J = 7.1$  Hz, 3H);  $^{13}\text{C}$  NMR (75 MHz,  $\text{CDCl}_3$ )  $\delta$  166.70, 147.77, 145.55, 127.93, 127.07, 126.71, 114.26, 77.56, 77.14, 76.71, 59.86, 17.28, 14.37; HRMS (ESI-MS)  $[\text{M}+\text{H}]^+$ : found 197.0556; calculated for  $\text{C}_{10}\text{H}_{13}\text{O}_2\text{S}$ : 197.0558.

Synthesis of the (*Z*) and (*E*) isomers of **6a** using 2-chloroacetoacetate

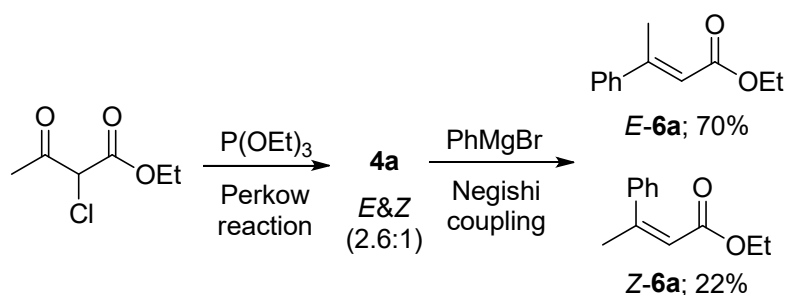

ArMgBr (1.5 mmol) was added to a stirred suspension of ZnCl<sub>2</sub> (1.5 mmol) in CH<sub>3</sub>CN (3.0 mL) at 0–5 °C under N<sub>2</sub> atmosphere, and then stirred at the same temperature for 0.5 h. The mixture of (*E*) and (*Z*)-β-phosphoroxylated α,β-unsaturated ester **4a** (1 mmol), derived according to the previous procedure, was dissolved in CH<sub>3</sub>CN (1 mL) and Pd(dppb)Cl<sub>2</sub> (0.02 mmol) in CH<sub>3</sub>CN (0.5 mL) were successively added to the mixture and stirred at 60 °C for 2 h. After cooling down, 1 M HCl solution was added to the mixture, which was extracted twice with AcOEt. The combined organic phase was washed with brine, dried (Na<sub>2</sub>SO<sub>4</sub>) and concentrated. The obtained crude product was purified by SiO<sub>2</sub>-column chromatography (hexane/AcOEt = 100:0 –10:1) to give the desired product **6a** (*E* and *Z*-isomers).

**(*Z*)-ethyl 3-phenylbut-2-enoate (6a):**

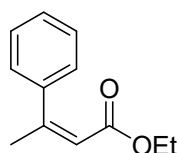

22% yield, colorless oil, R<sub>f</sub> = 0.62 (PE/EA= 10:1). <sup>1</sup>H NMR (300 MHz, CDCl<sub>3</sub>) δ 7.33 (t, J = 7.1 Hz, 3H), 7.20 (d, J = 7.3 Hz, 2H), 5.92 (s, 1H), 4.00 (q, J = 7.1 Hz, 2H), 2.18 (s, 3H), 1.08 (t, J = 7.1 Hz, 3H); <sup>13</sup>C NMR (75 MHz, CDCl<sub>3</sub>) δ 165.94, 155.40, 140.88, 127.90, 127.74, 126.83, 117.80, 59.77, 27.19, 13.99; HRMS (ESI-MS) [M+H]<sup>+</sup>: found 191.0990; calculated for C<sub>12</sub>H<sub>15</sub>O<sub>2</sub>: 191.0994.

## Spectra of products 4 & 6

### Compound 4a <sup>1</sup>H NMR

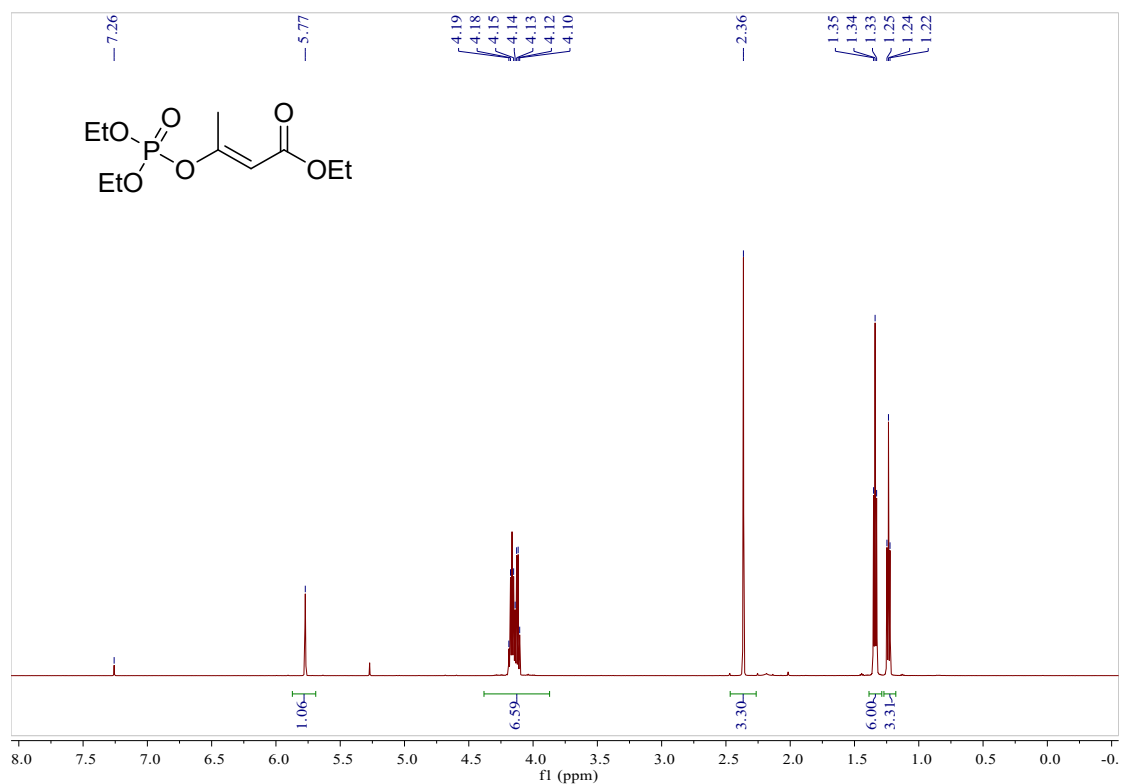

### Compound 4a <sup>13</sup>C NMR

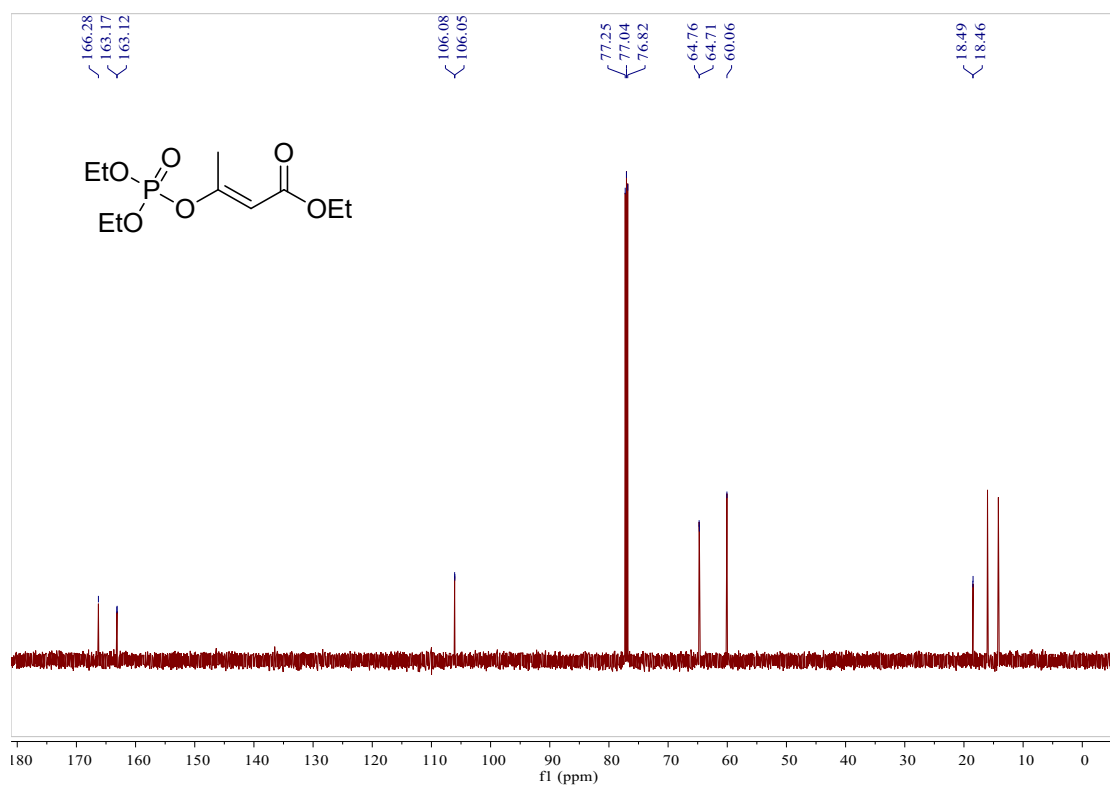



### Compound 4a <sup>31</sup>P NMR

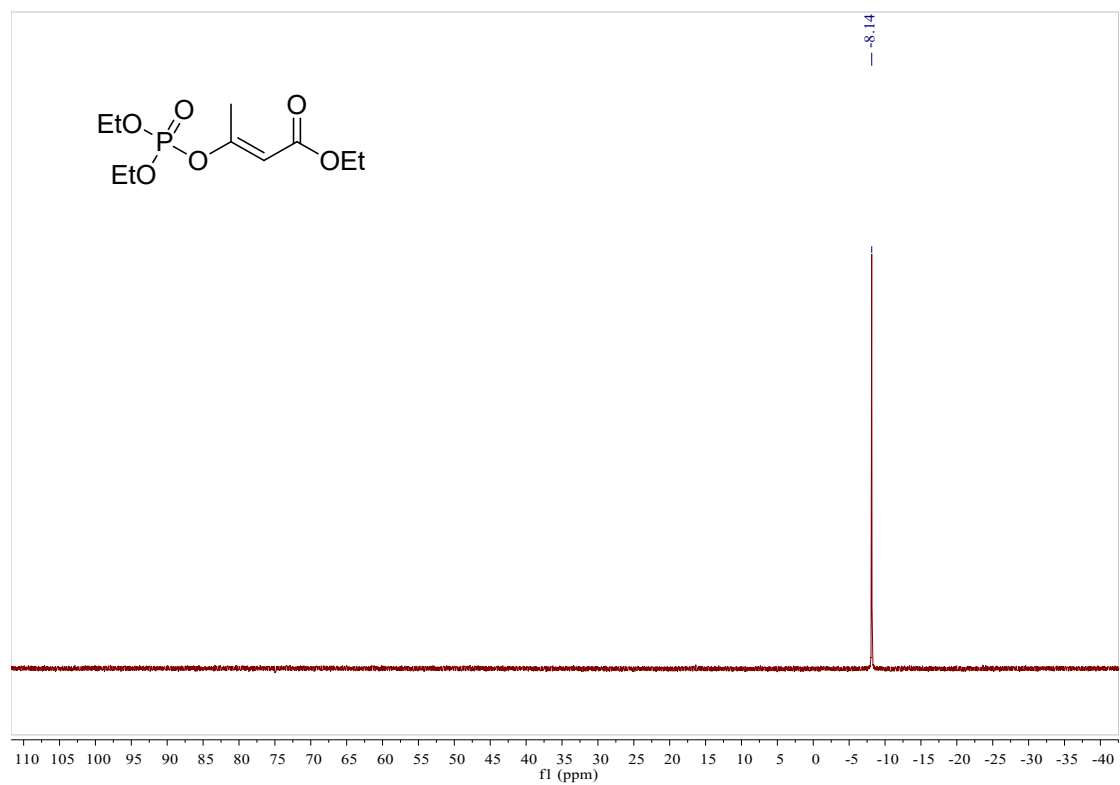

### Compound 4b <sup>1</sup>H NMR

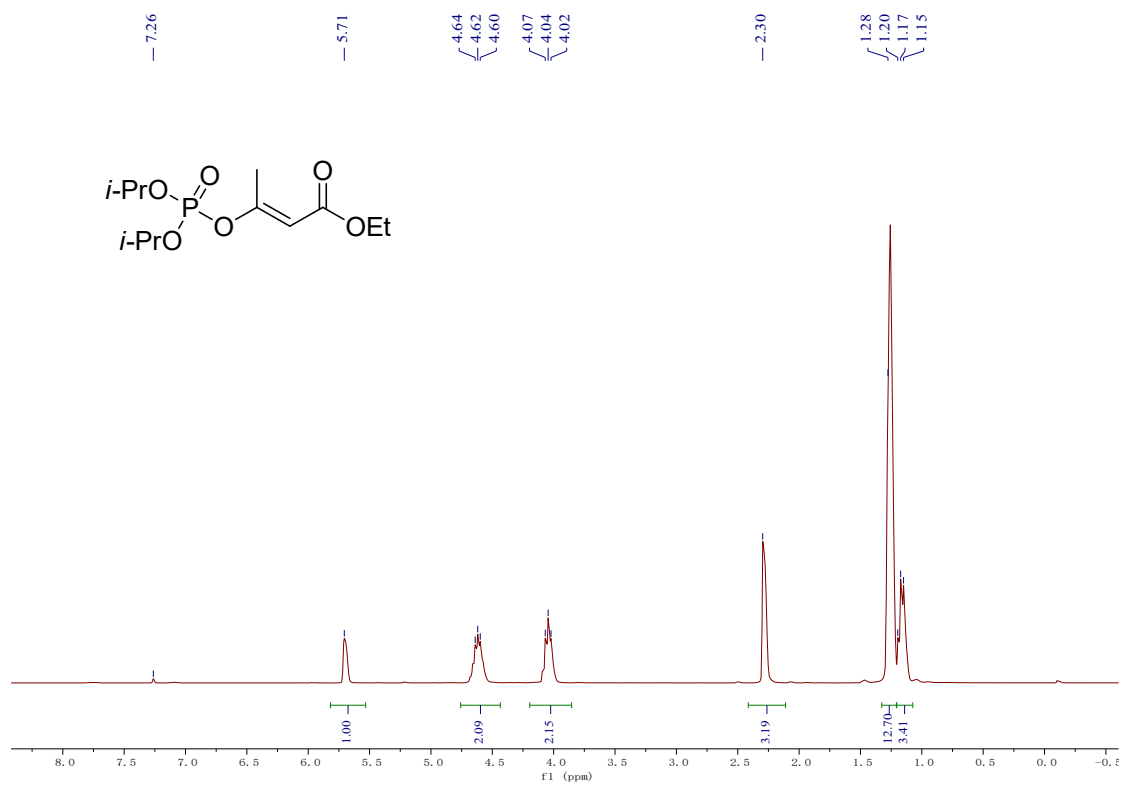

### Compound 4b <sup>13</sup>C NMR

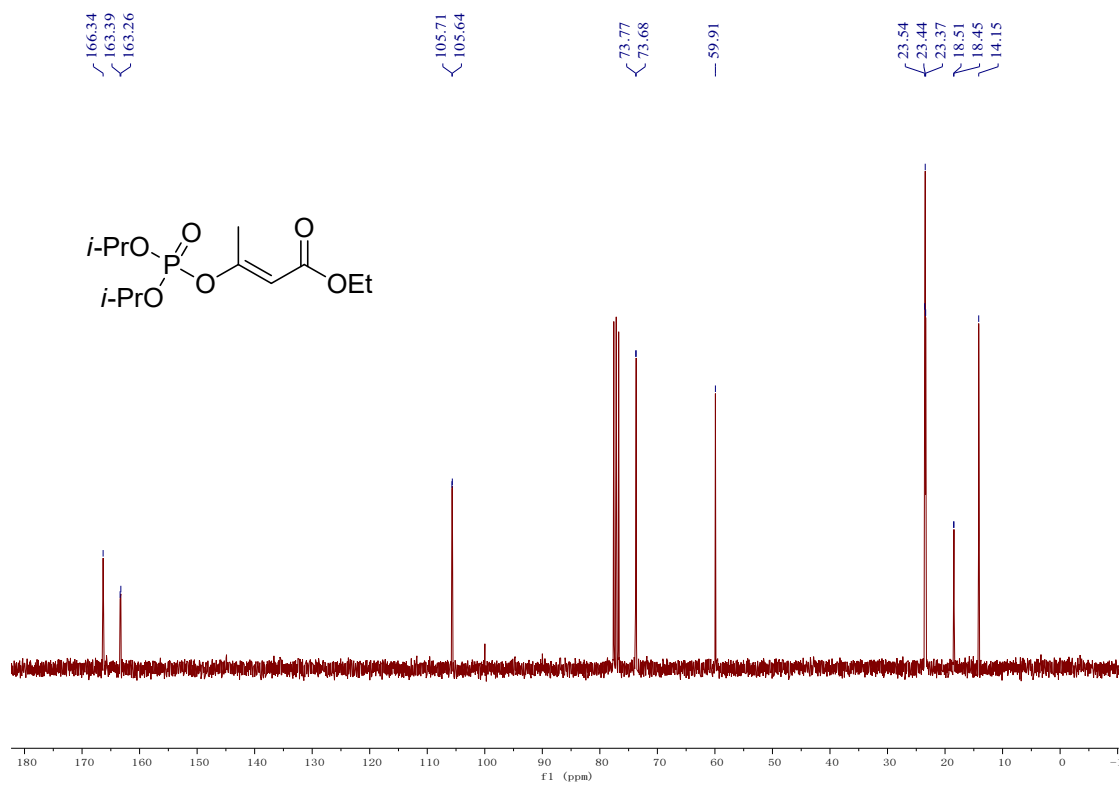

### Compound 4b <sup>31</sup>P NMR

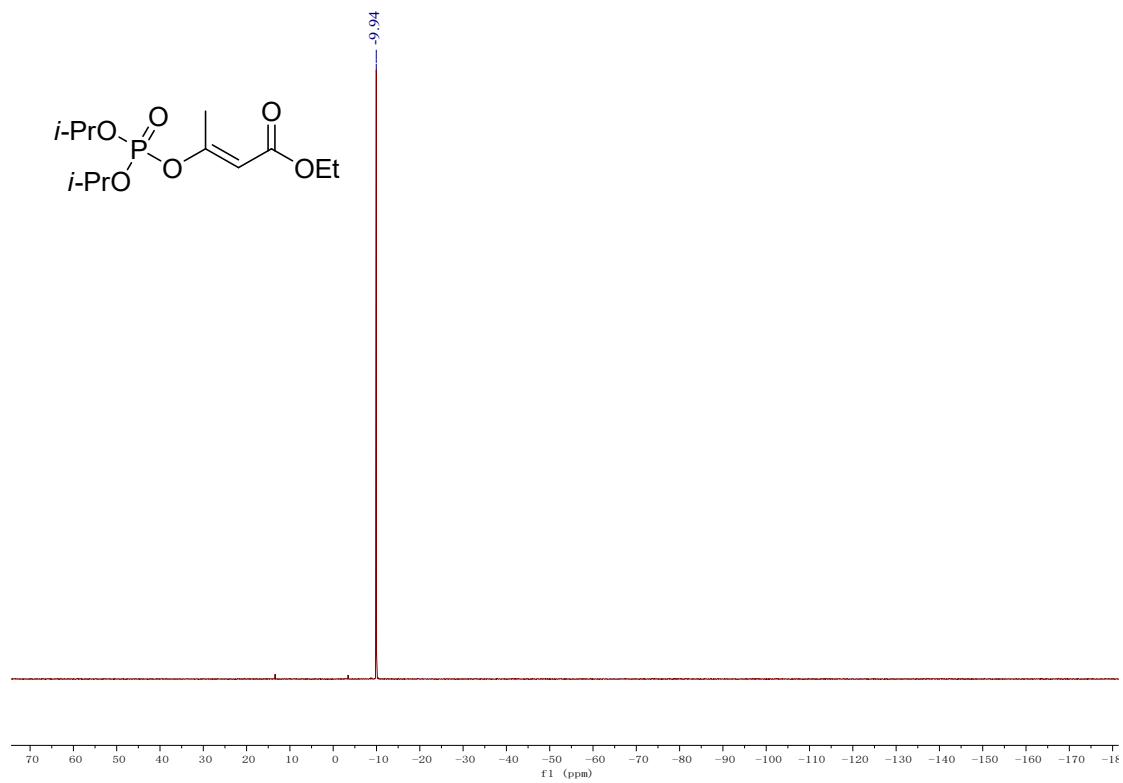

### Compound 4c <sup>1</sup>H NMR

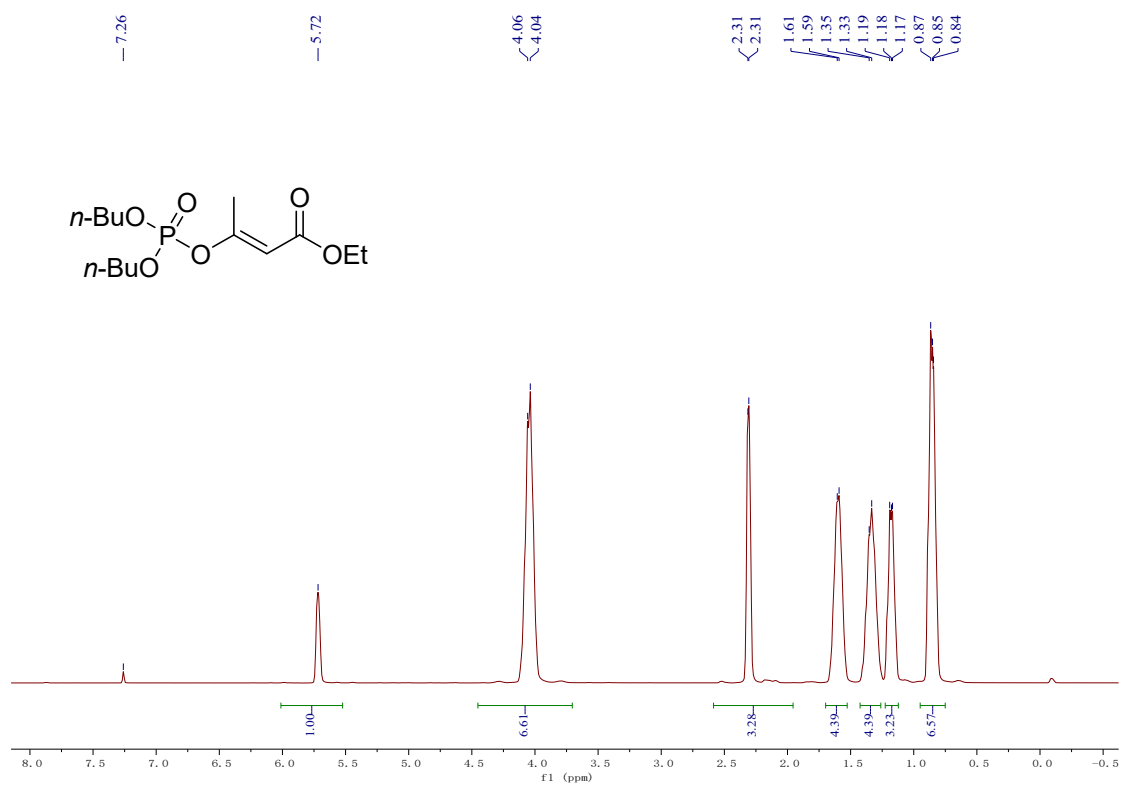

### Compound 4c <sup>13</sup>C NMR

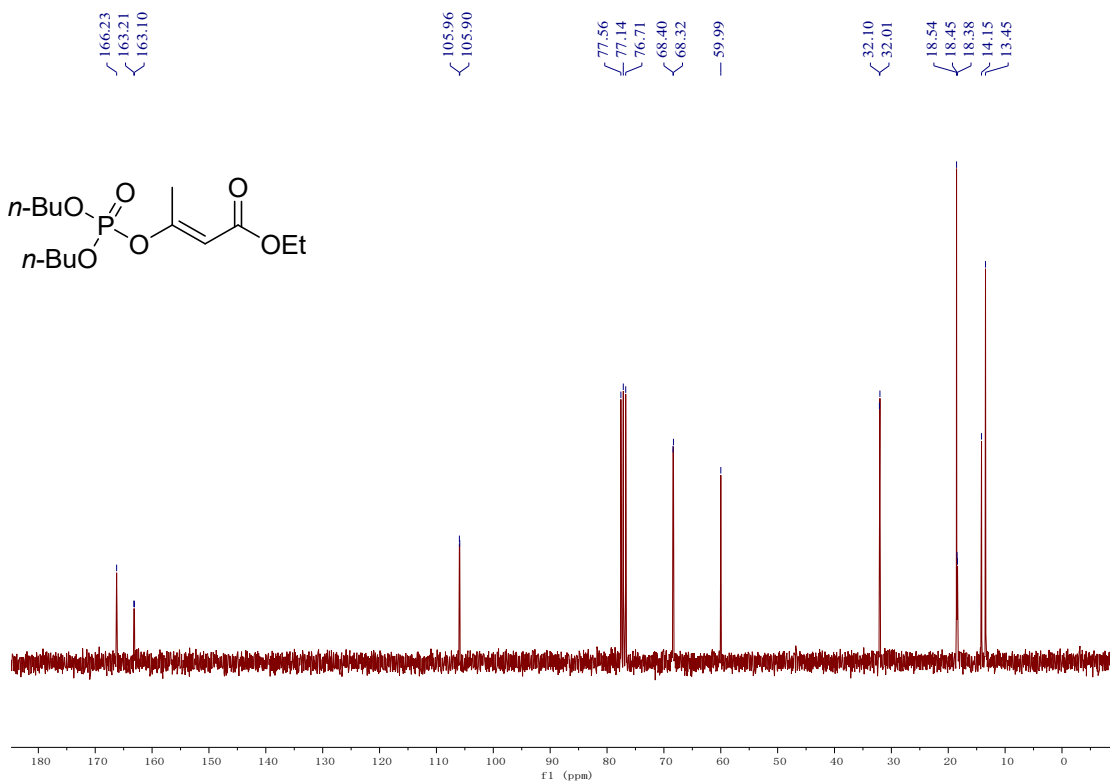

### Compound 4c <sup>31</sup>P NMR

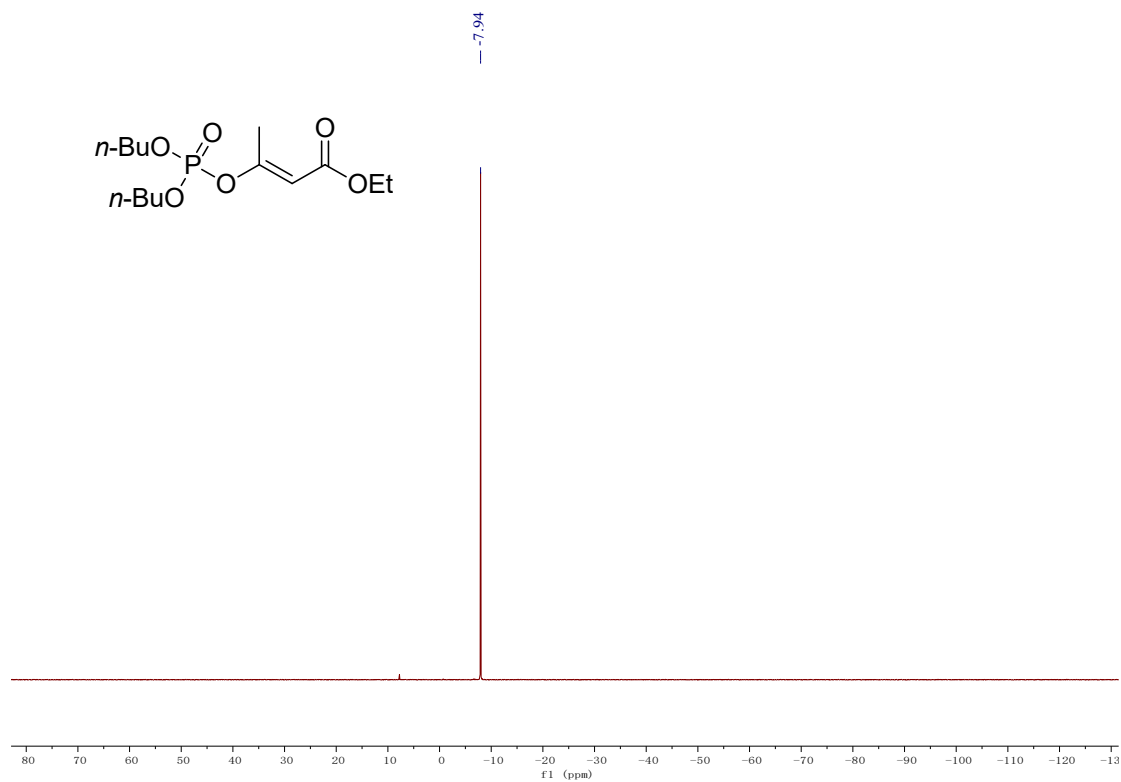

### Compound 4d <sup>1</sup>H NMR

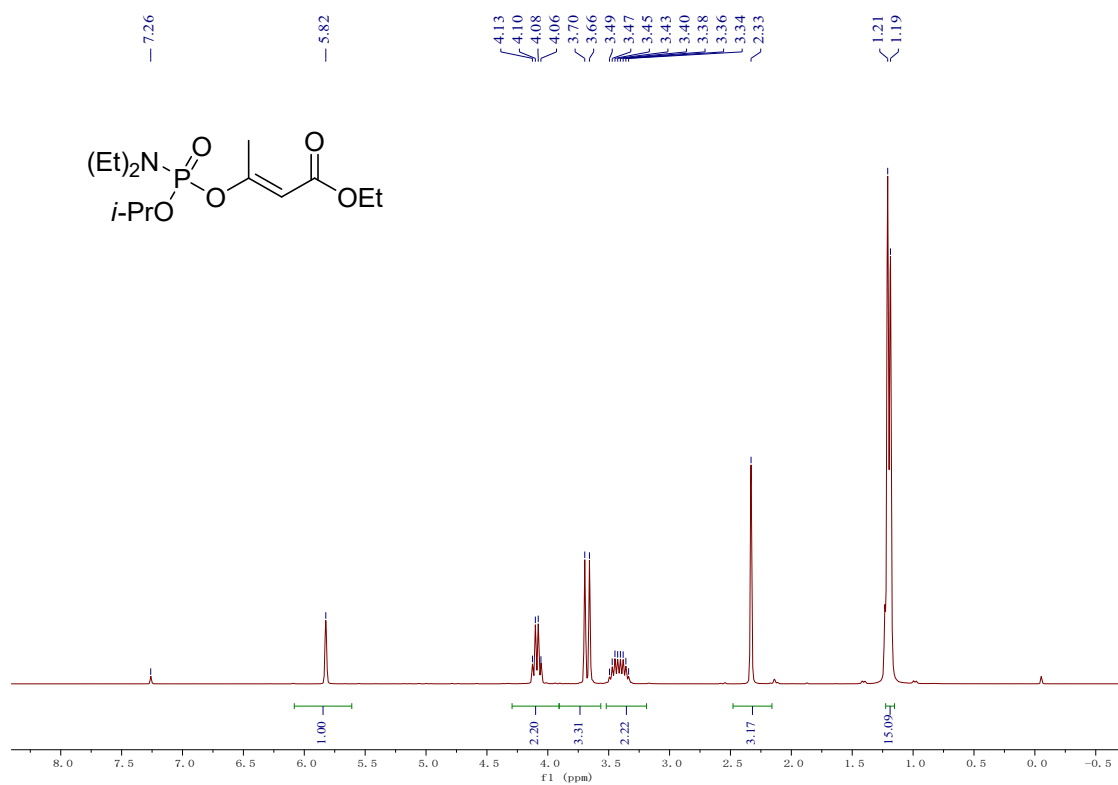

### Compound 4d <sup>13</sup>C NMR

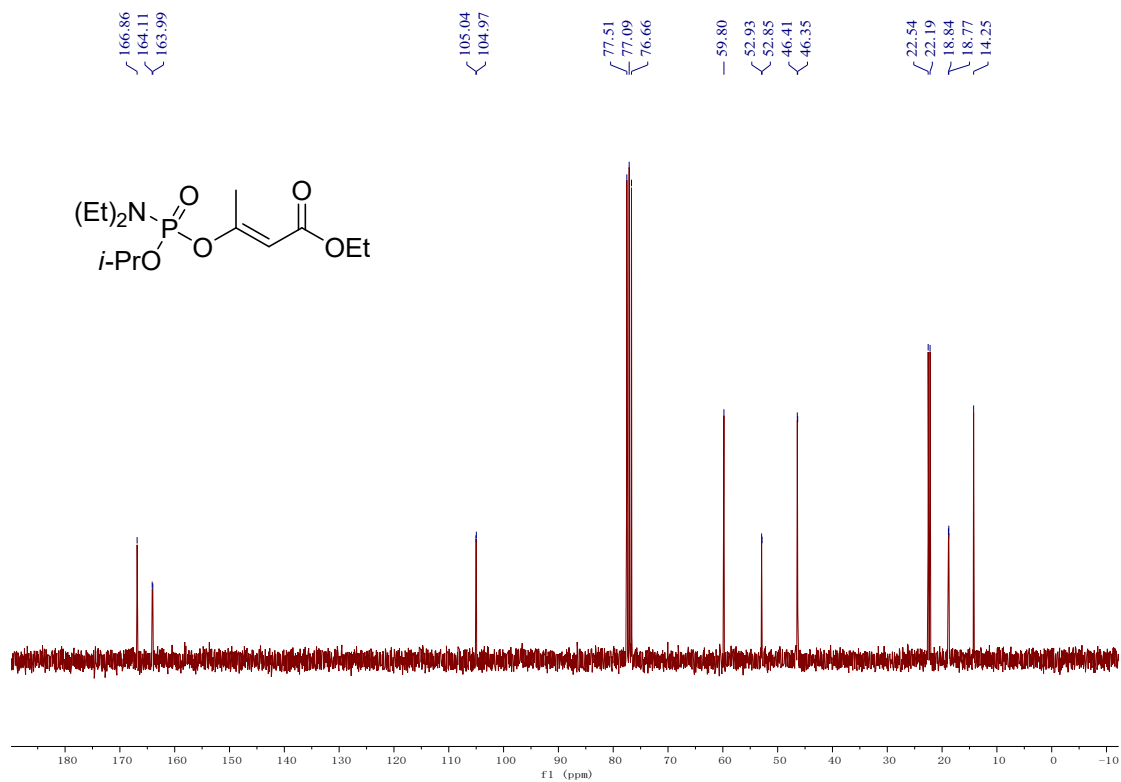

### Compound 4d <sup>31</sup>P NMR

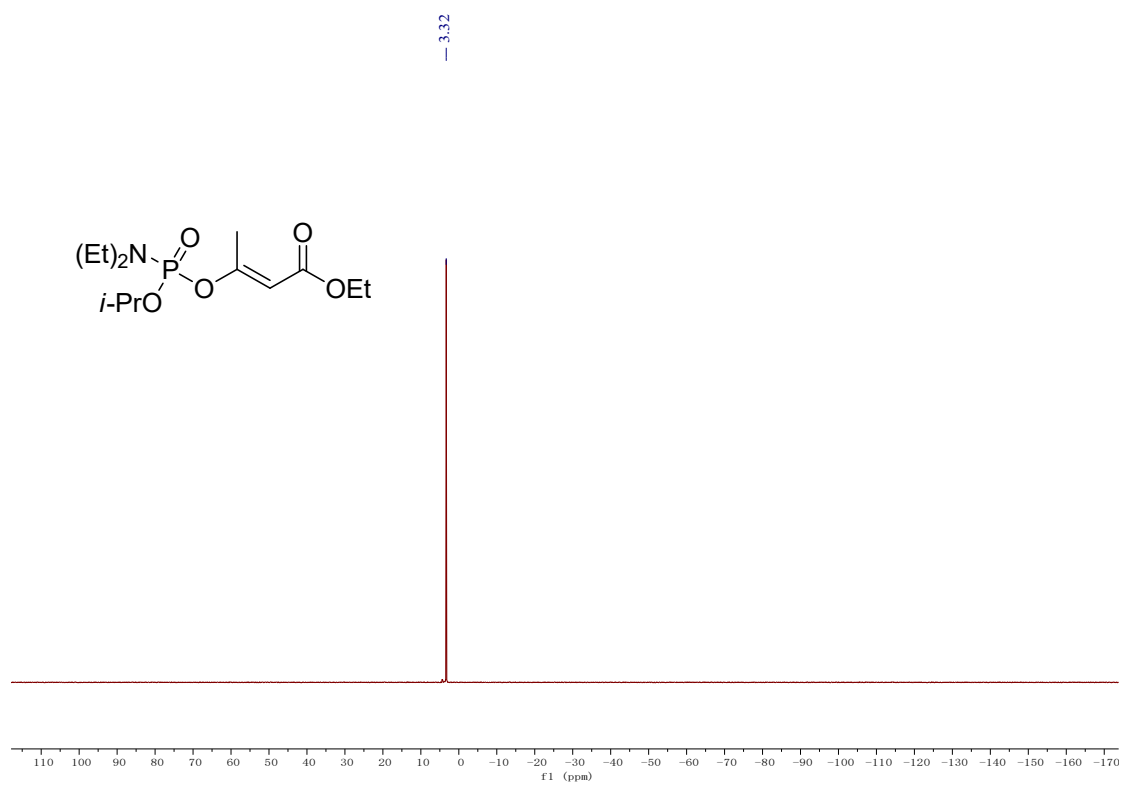

### Compound 4e <sup>1</sup>H NMR

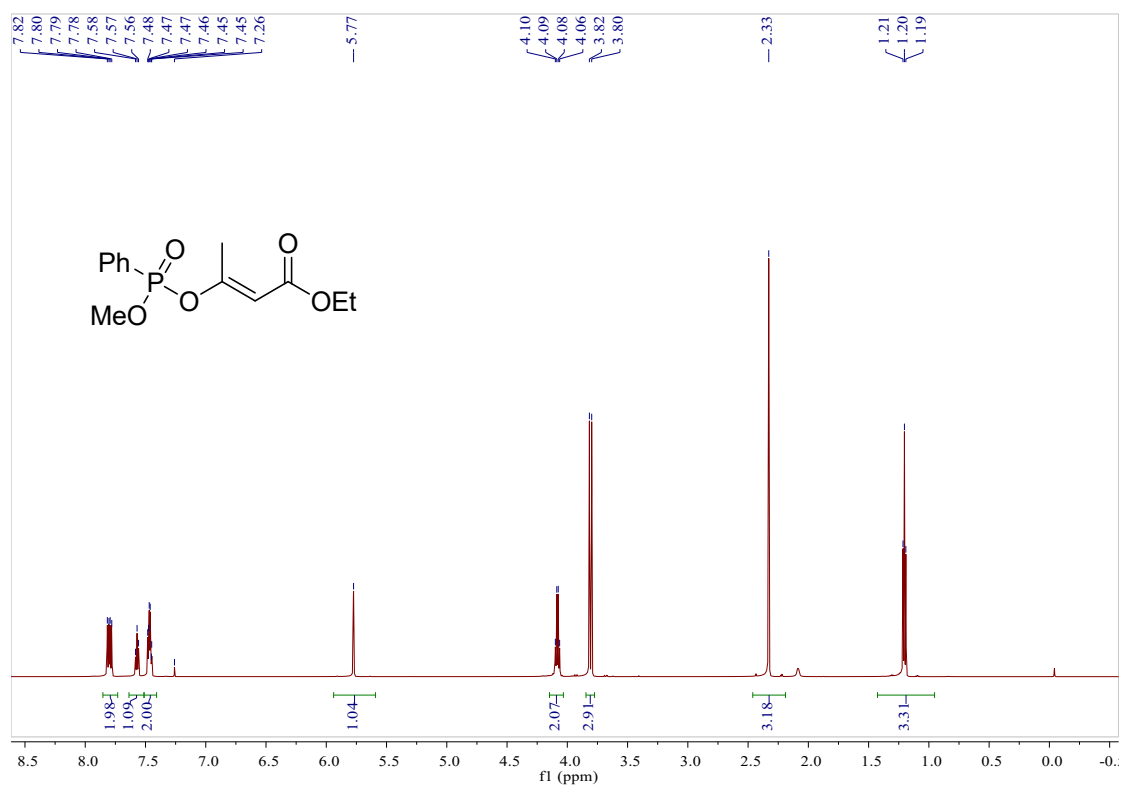

### Compound 4e <sup>13</sup>C NMR

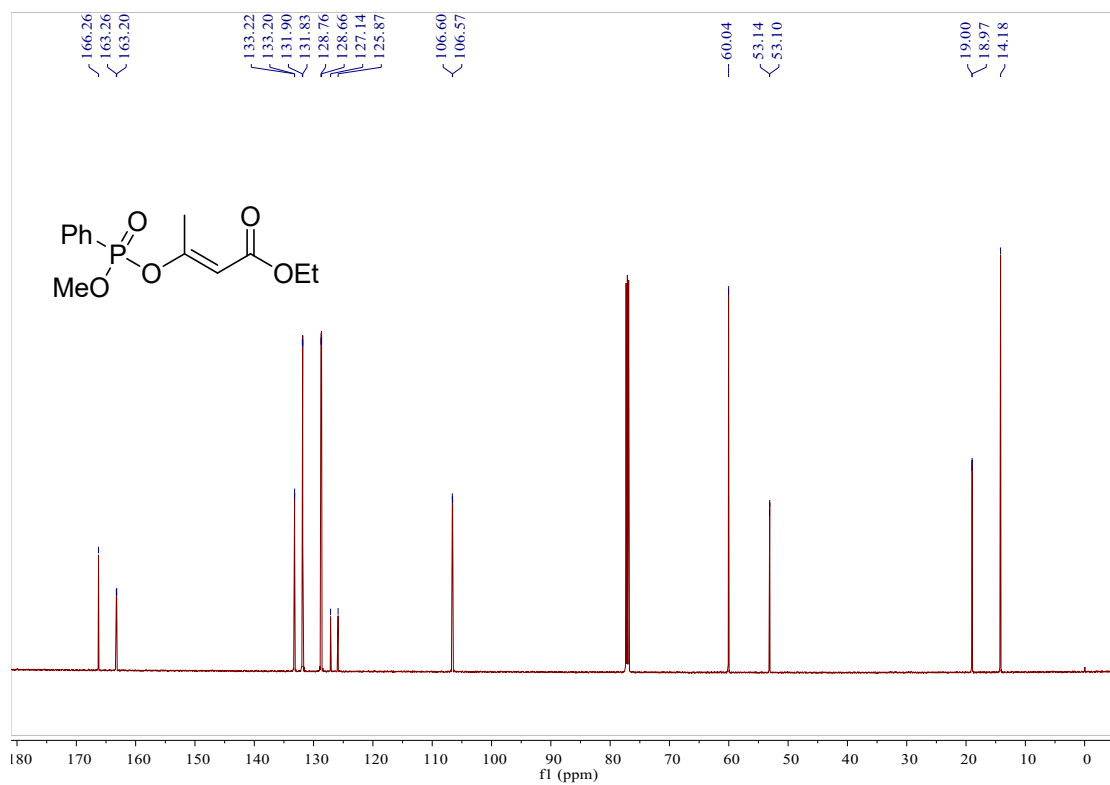

### Compound 4e <sup>31</sup>P NMR

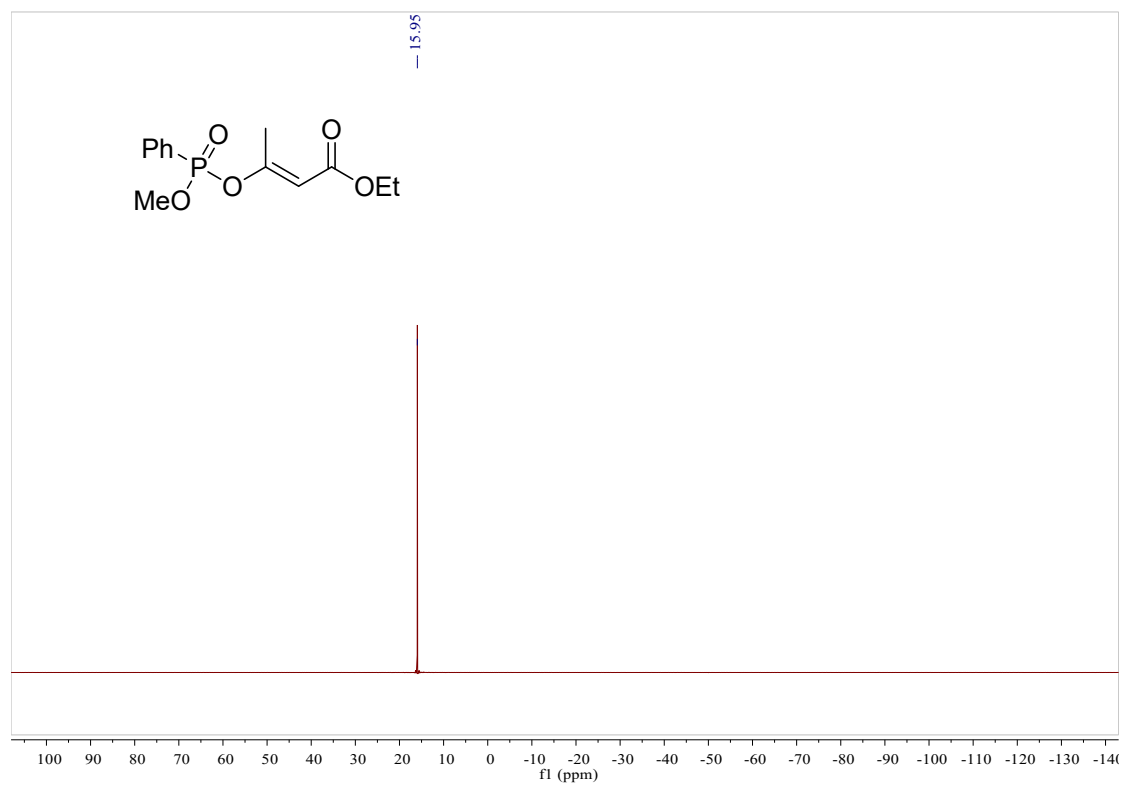

### Compound 4f <sup>1</sup>H NMR

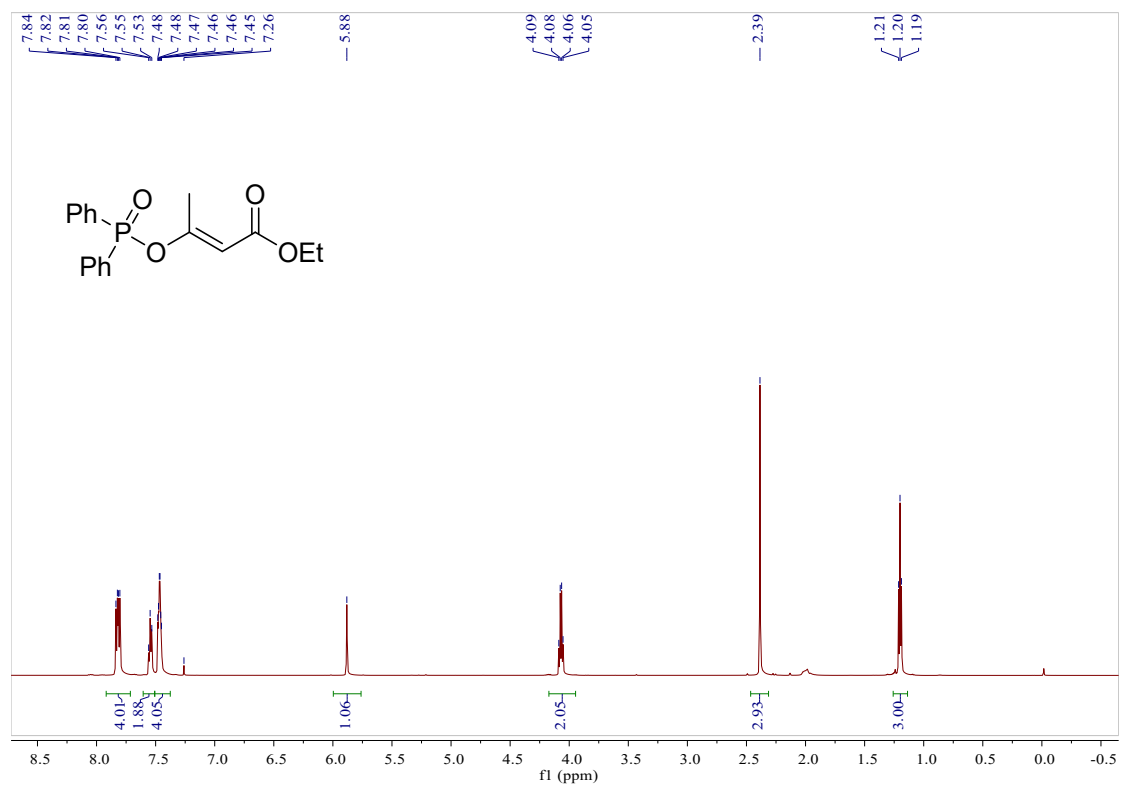

### Compound 4f <sup>13</sup>C NMR

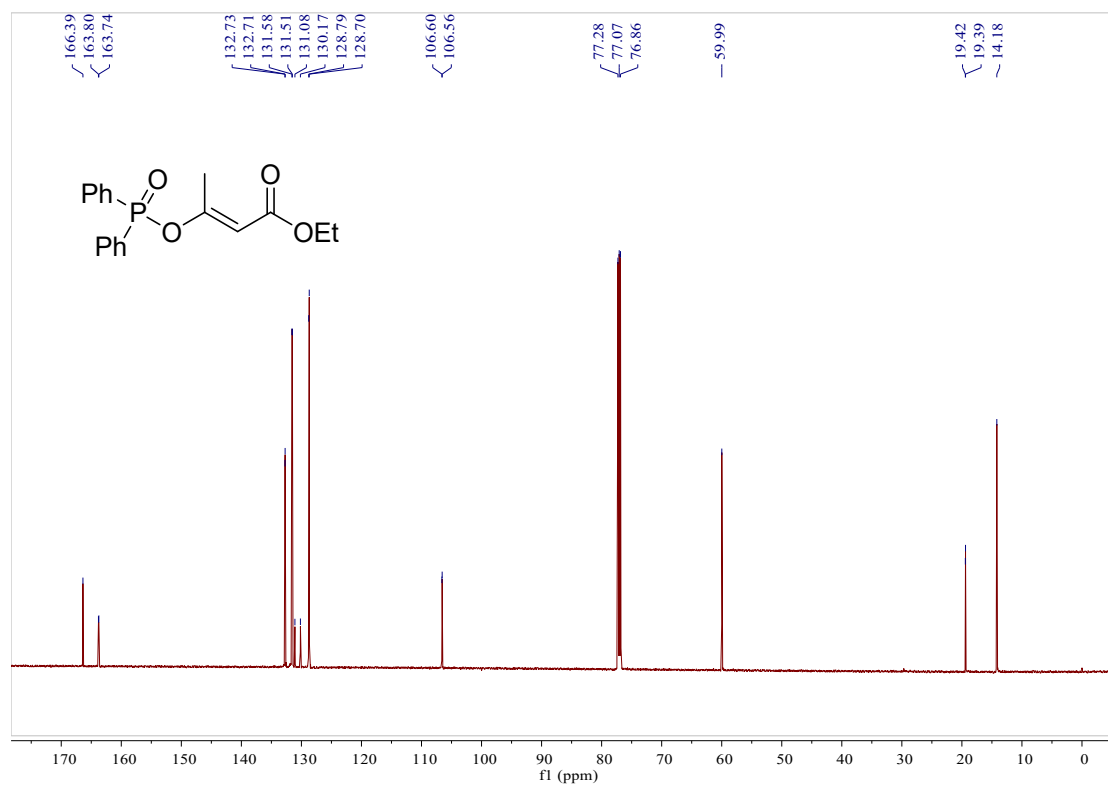

### Compound 4f <sup>31</sup>P NMR

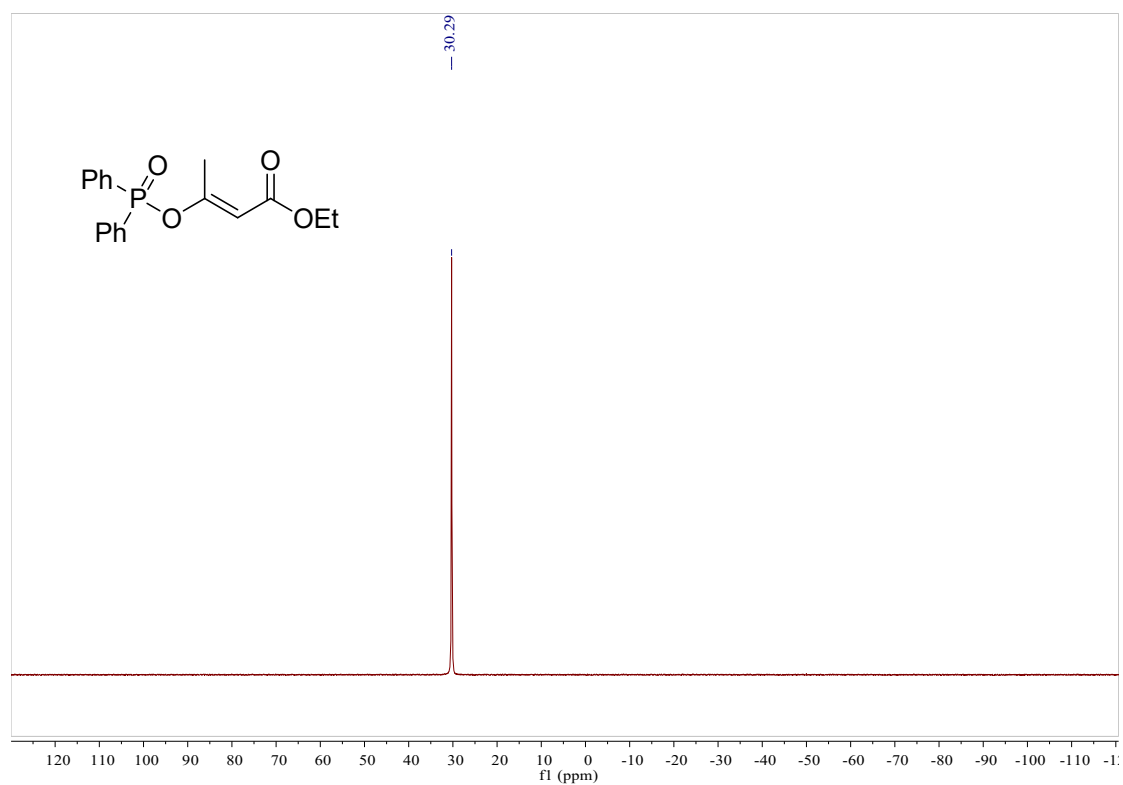



### Compound 4g <sup>1</sup>H NMR

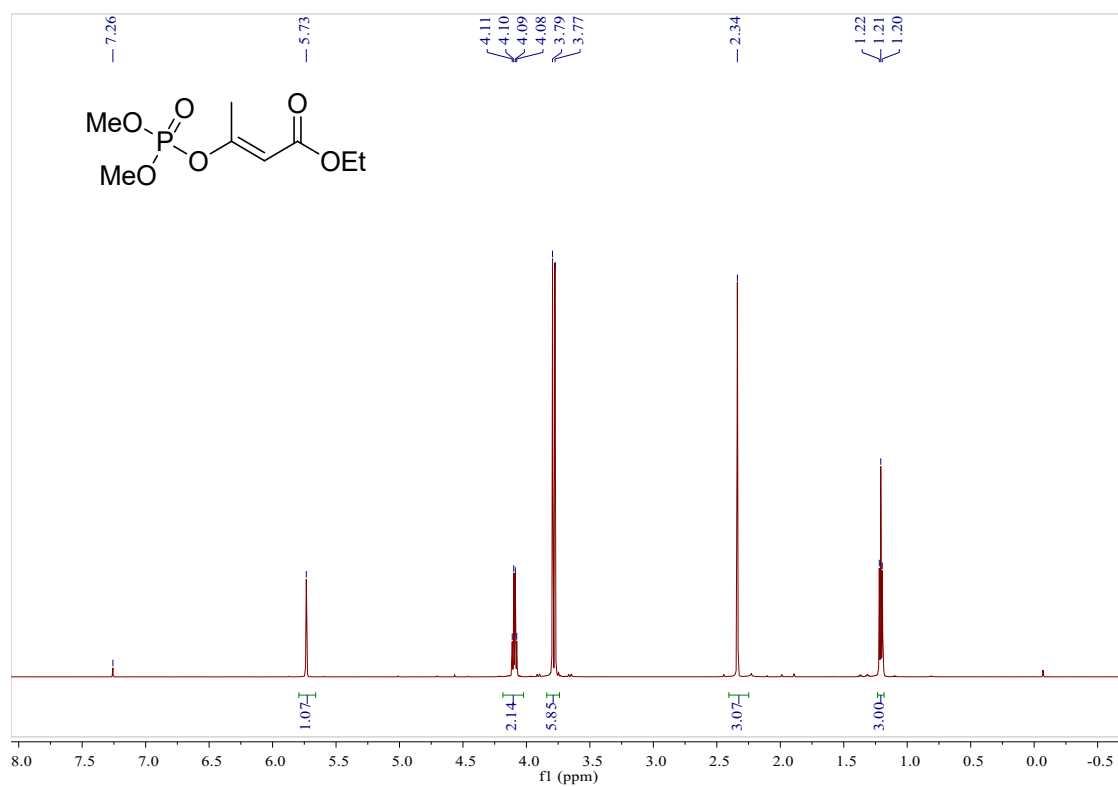

### Compound 4g <sup>13</sup>C NMR

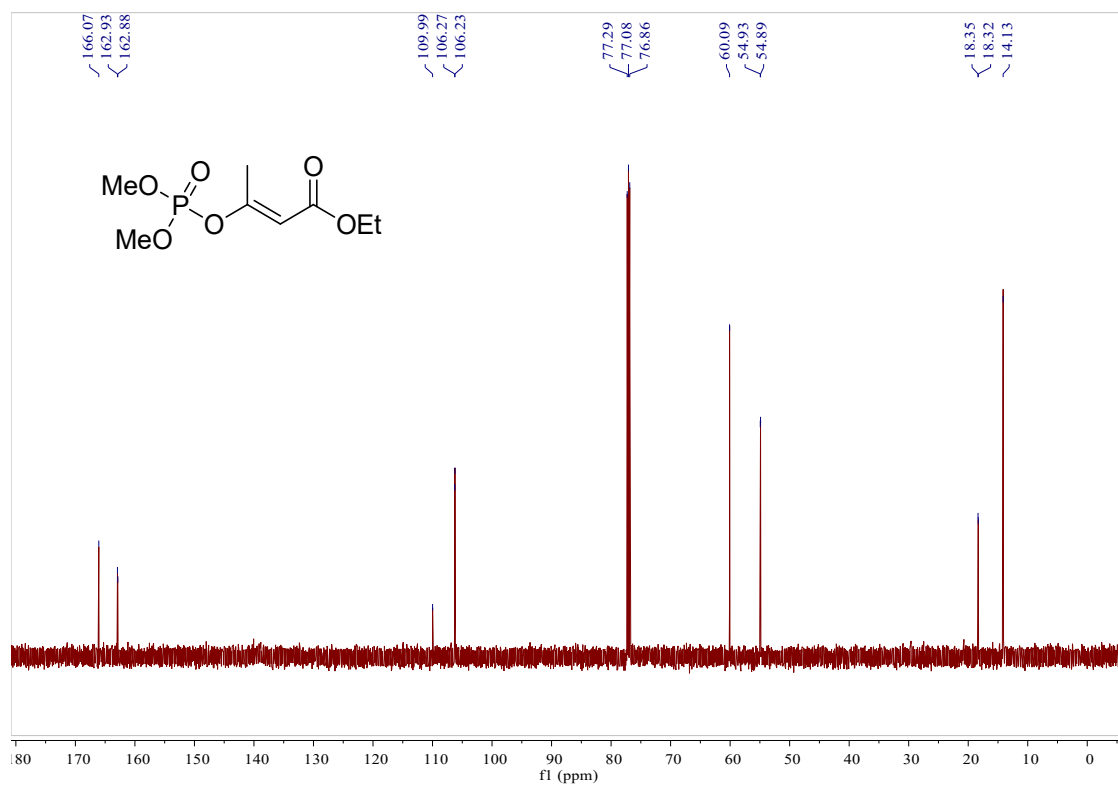

### Compound 4g <sup>31</sup>P NMR

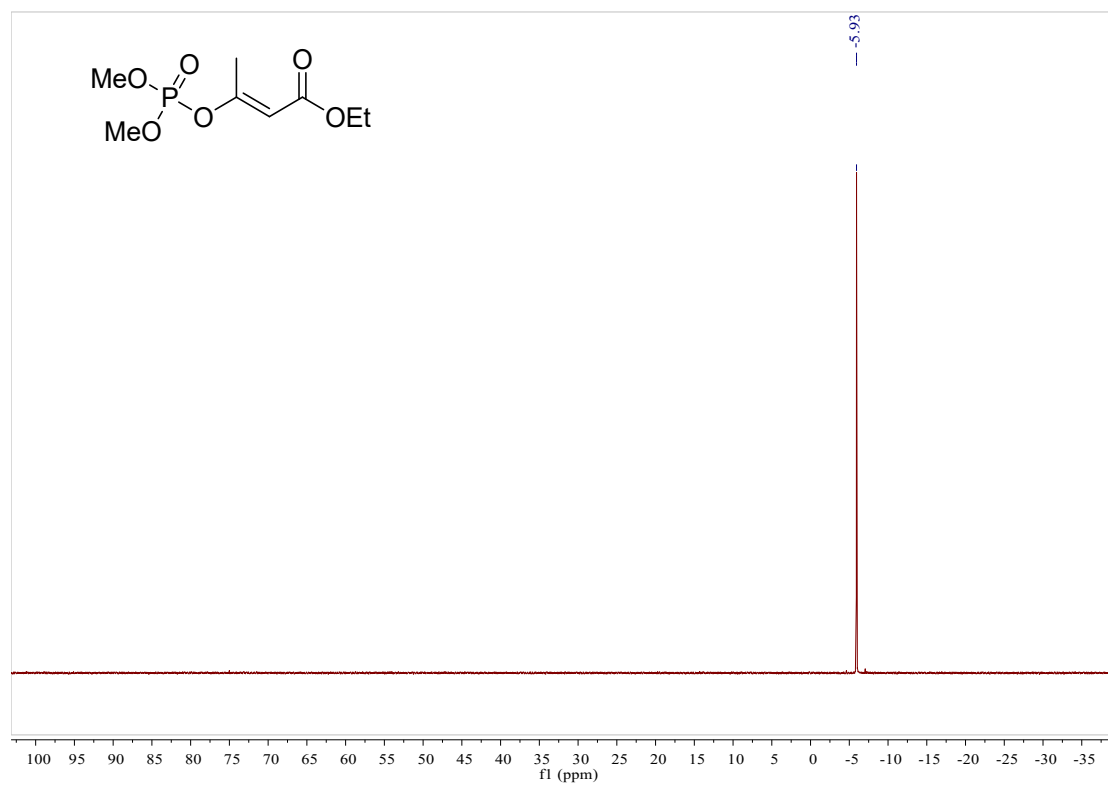

### Compound 4h <sup>1</sup>H NMR

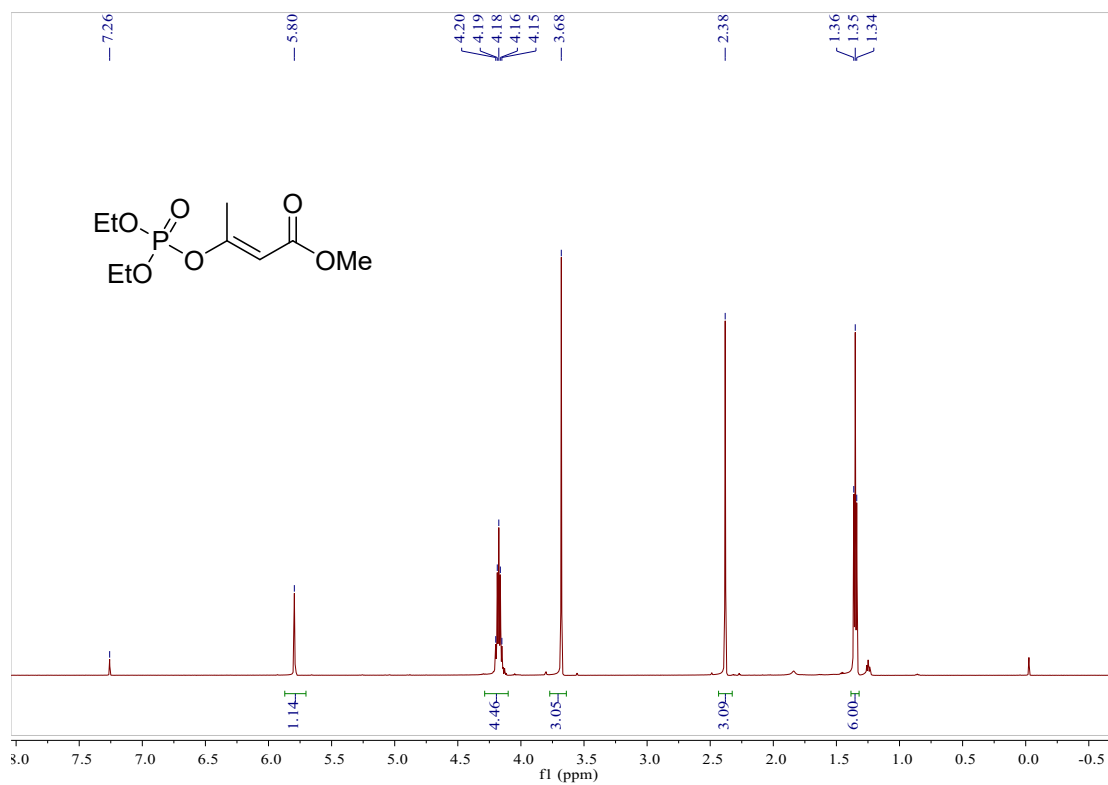

### Compound 4h <sup>13</sup>C NMR

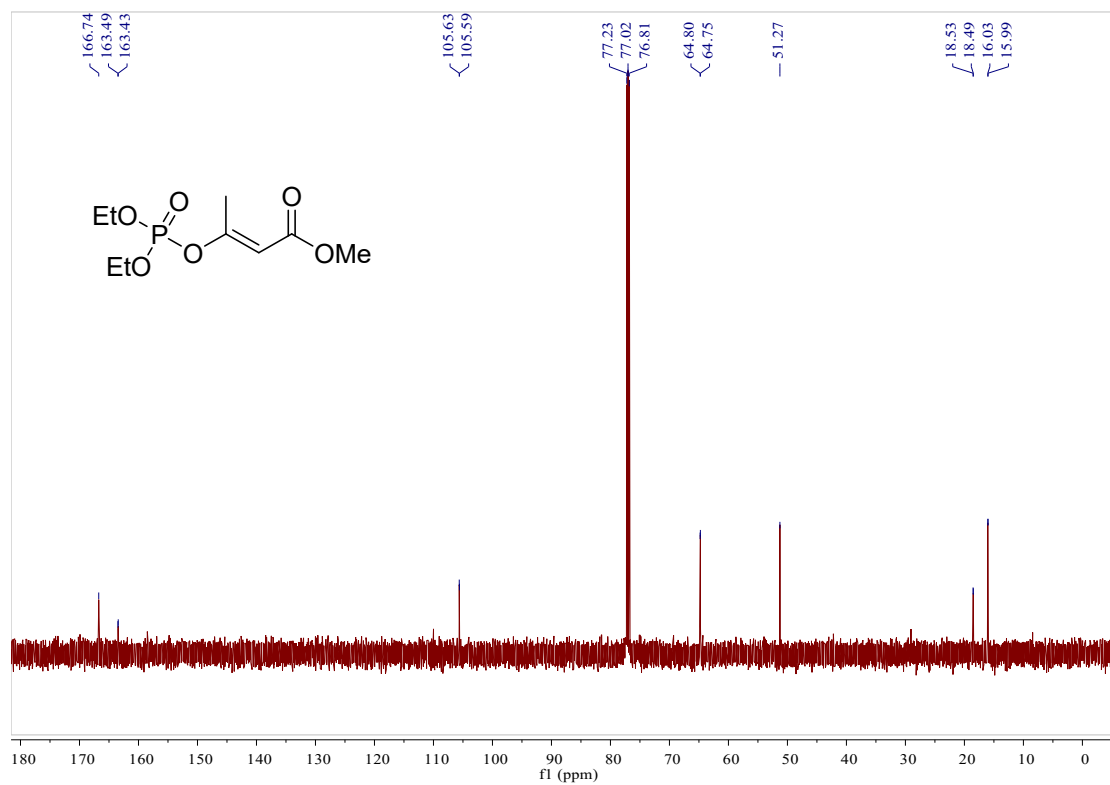

### Compound 4h <sup>31</sup>P NMR

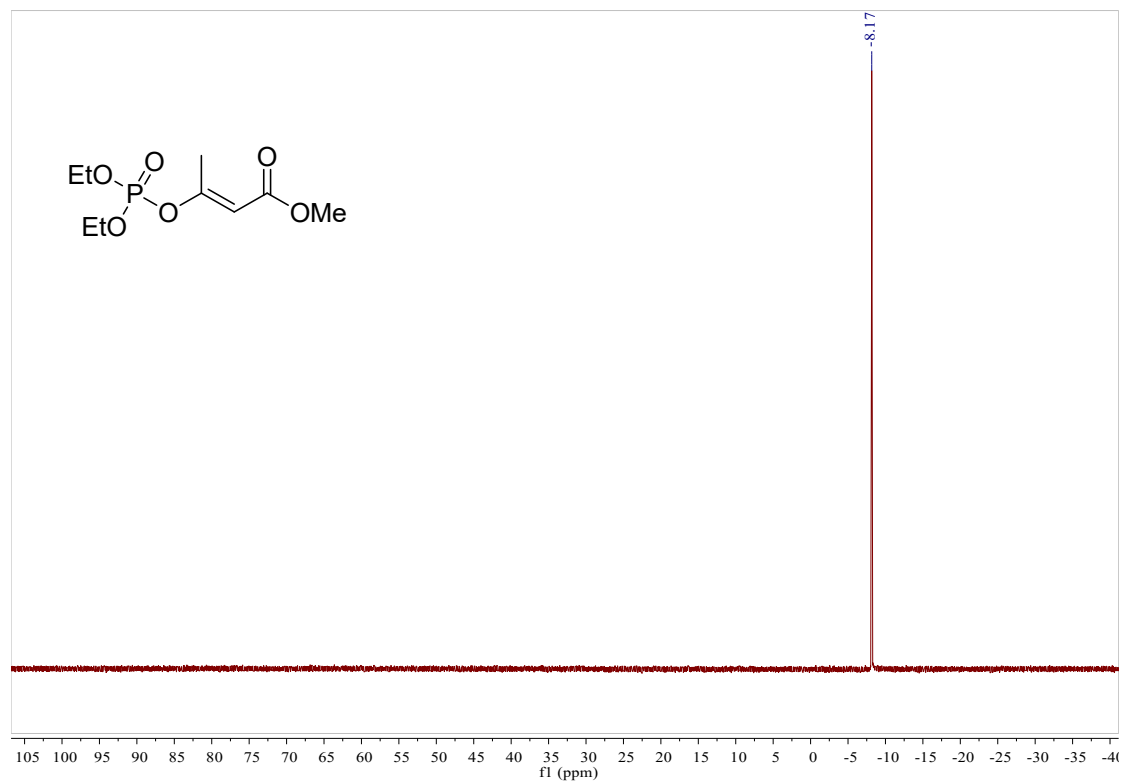

### Compound 4i <sup>1</sup>H NMR

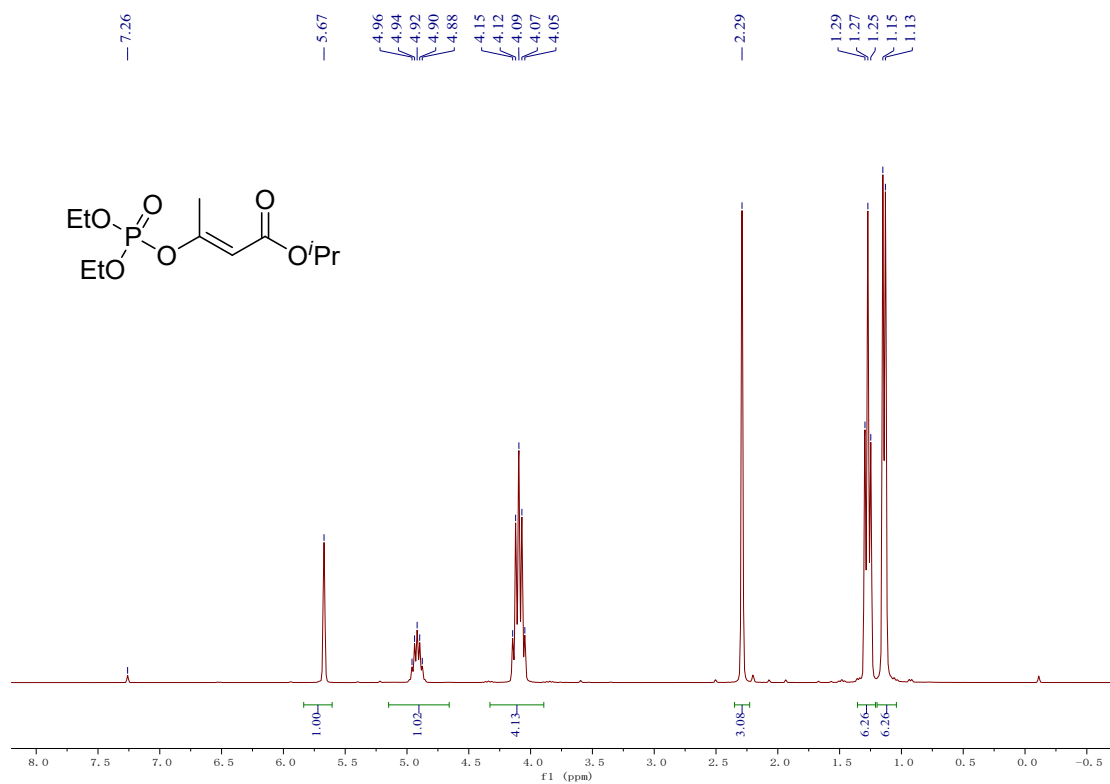

### Compound 4i <sup>13</sup>C NMR

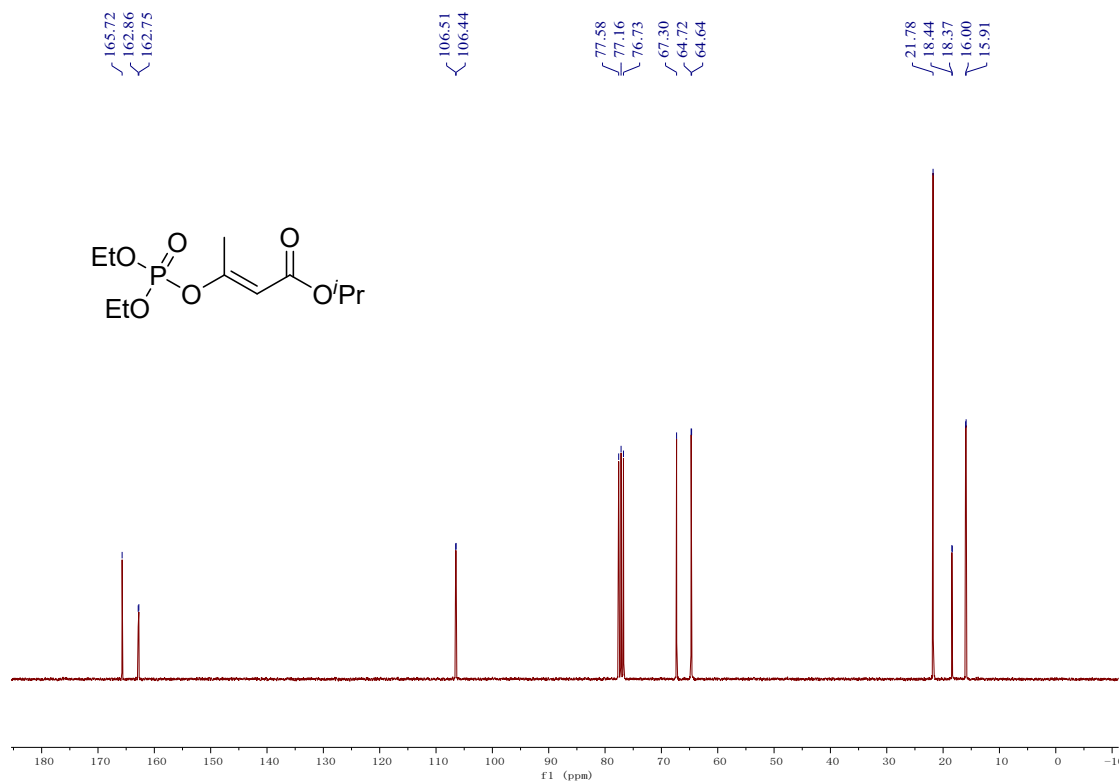

### Compound 4i <sup>31</sup>P NMR

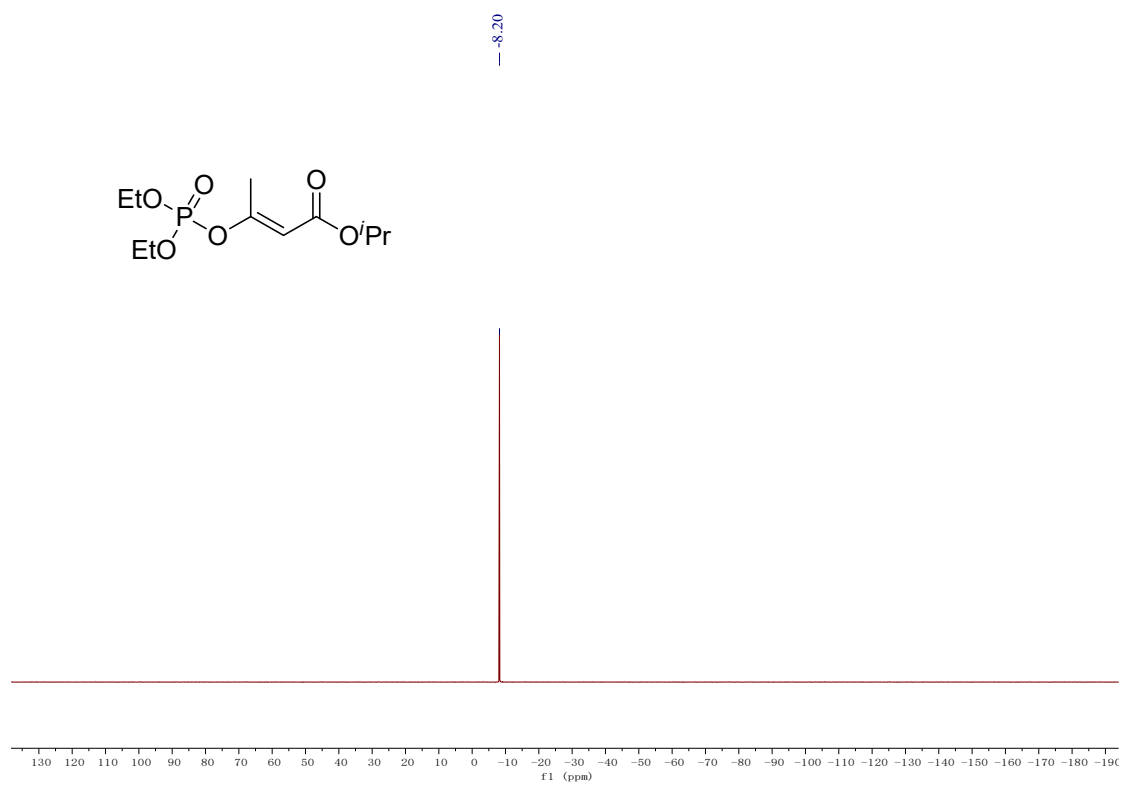

### Compound 4j <sup>1</sup>H NMR

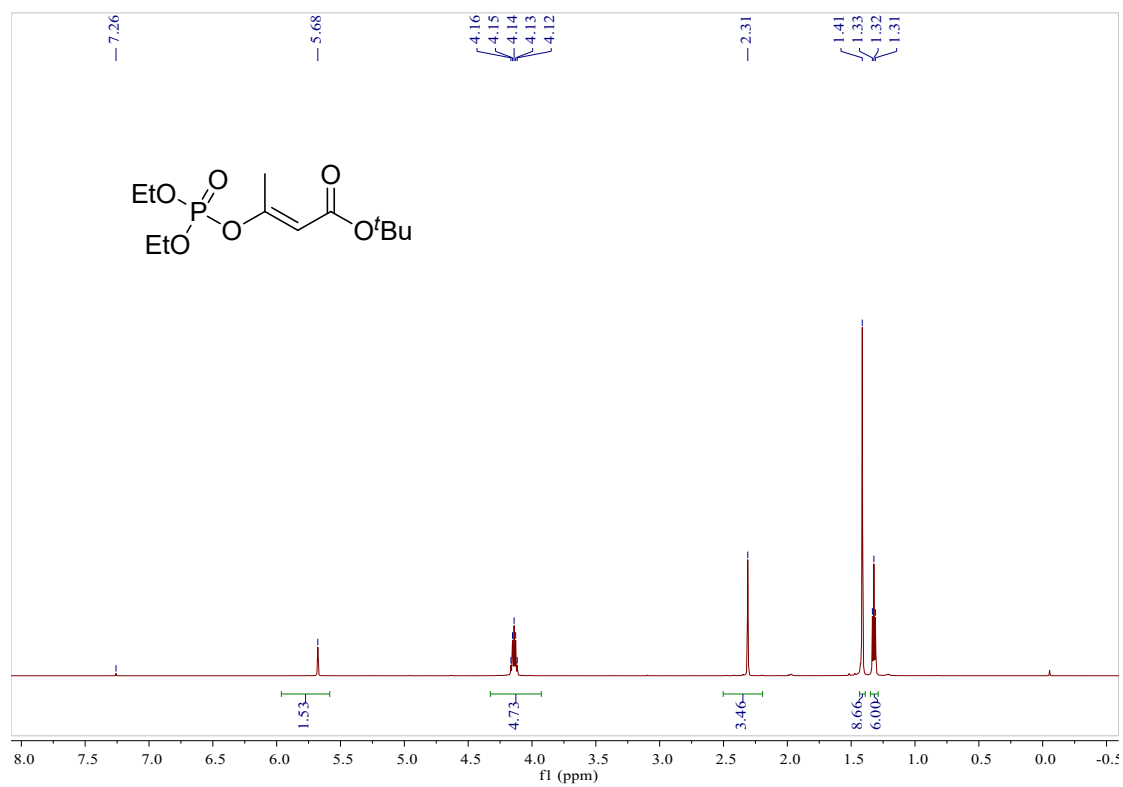

### Compound 4j <sup>13</sup>C NMR

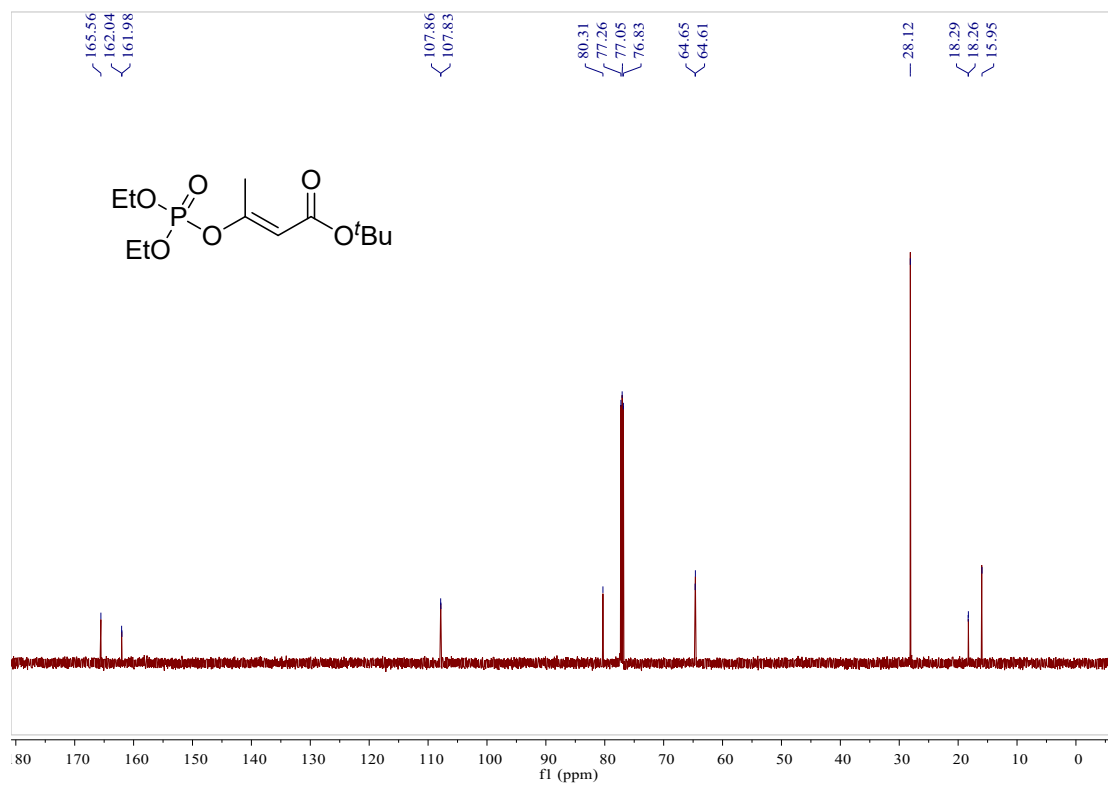

### Compound 4j <sup>31</sup>P NMR

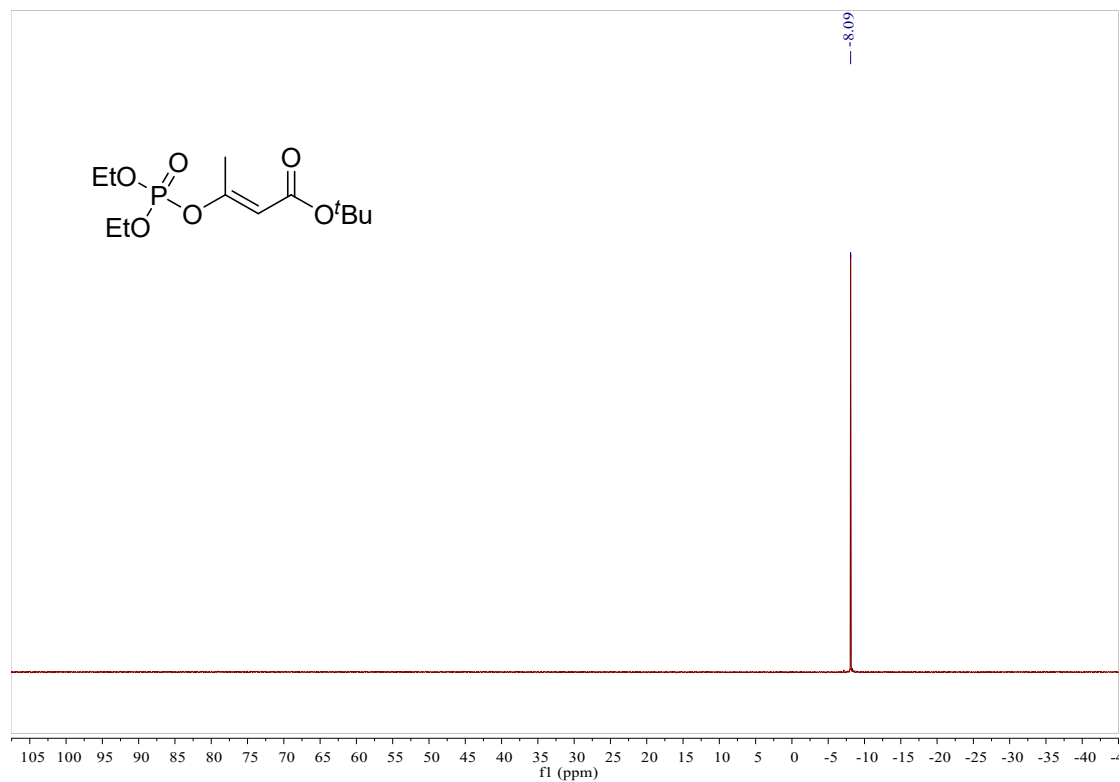

### Compound 4k <sup>1</sup>H NMR

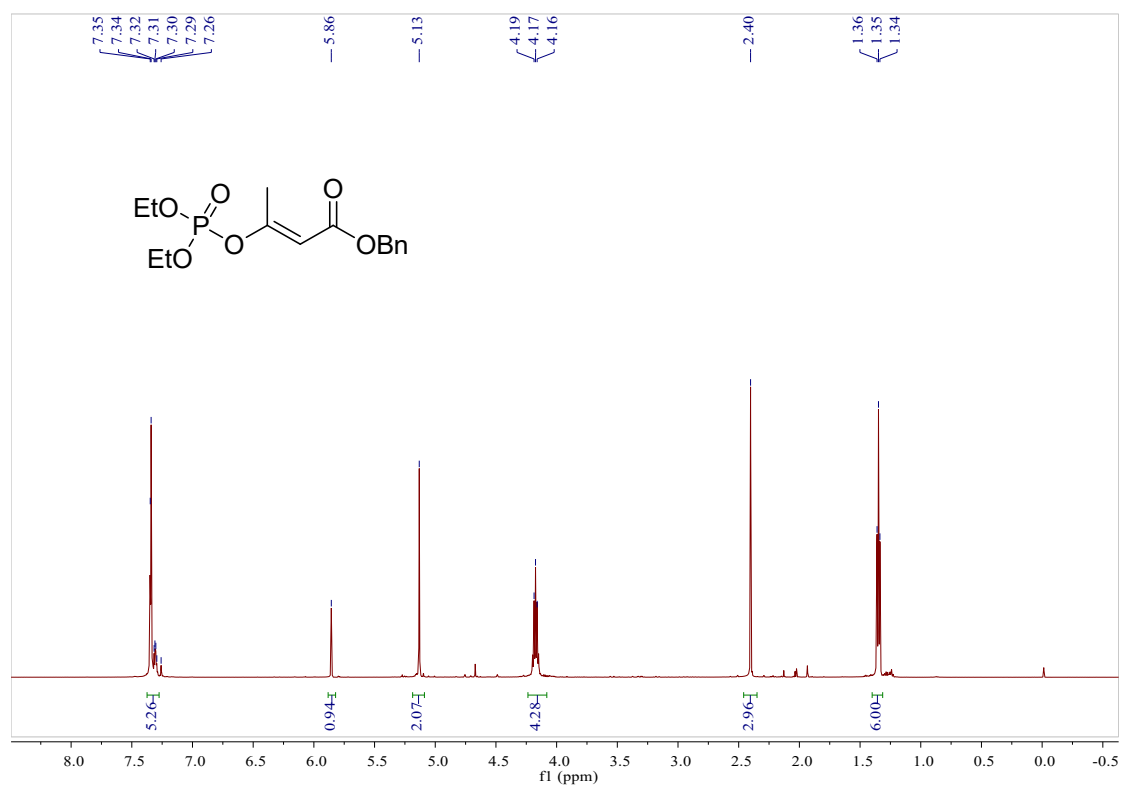

### Compound 4k <sup>13</sup>C NMR

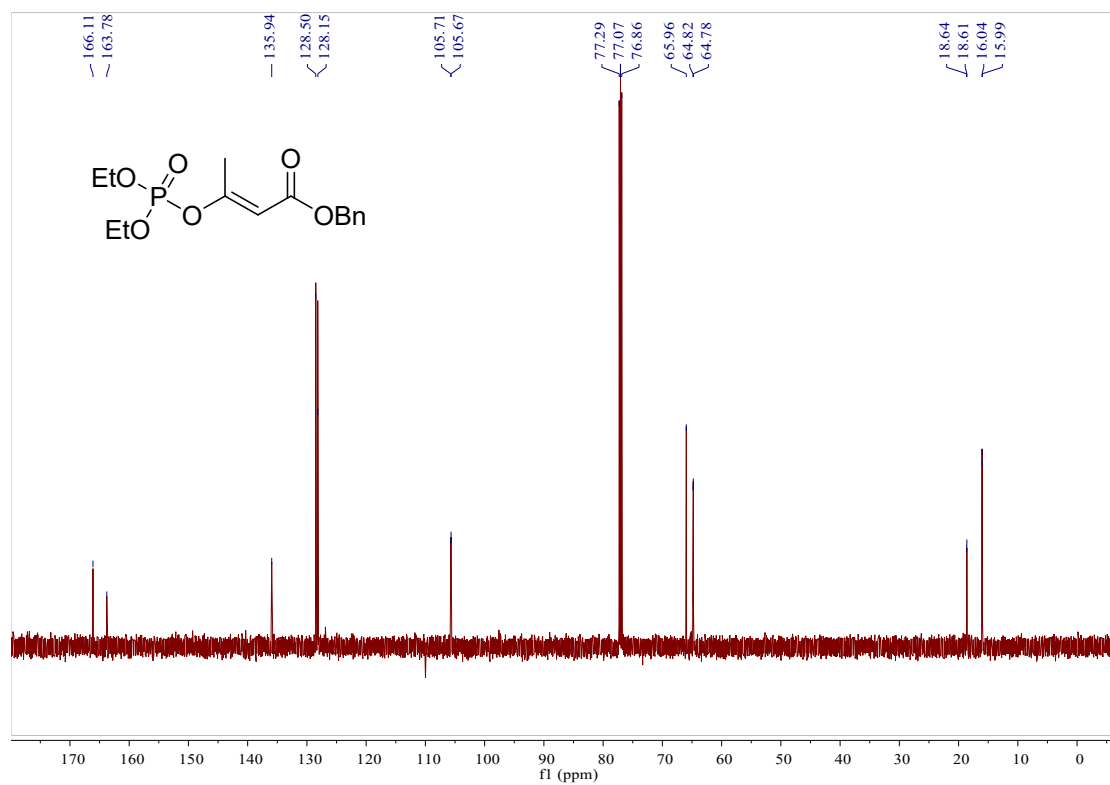

### Compound 4k <sup>31</sup>P NMR

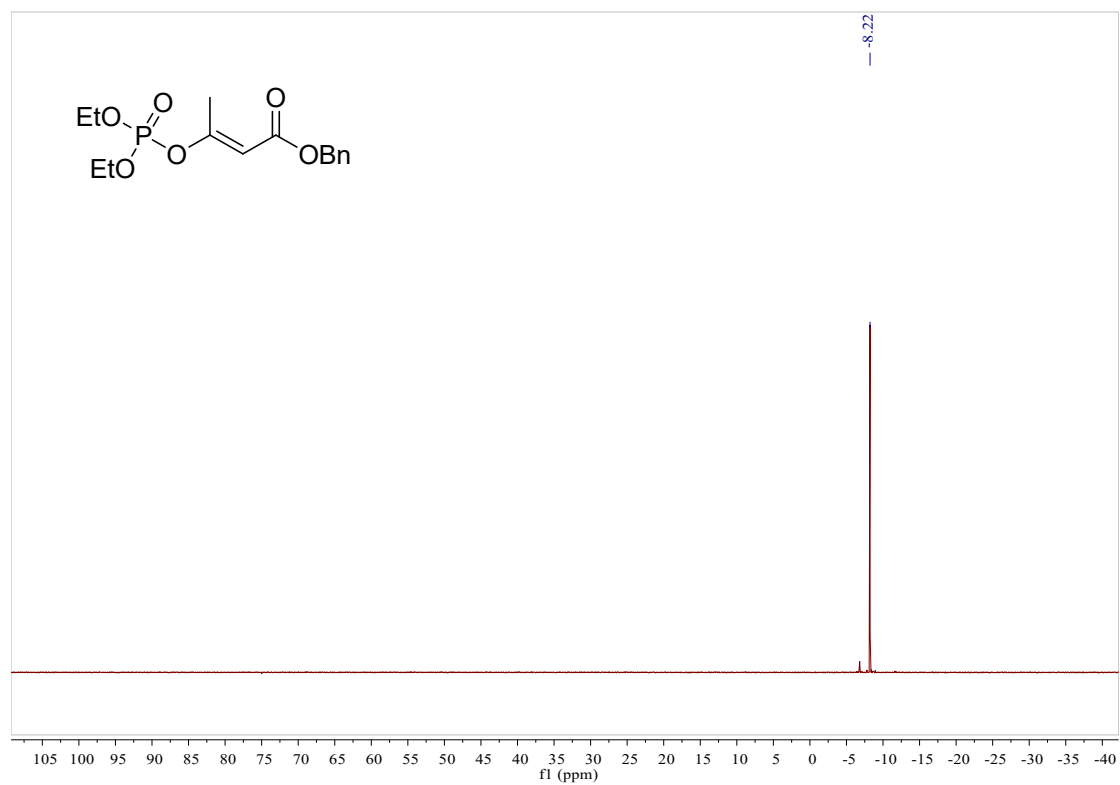

### Compound E-6a <sup>1</sup>H NMR

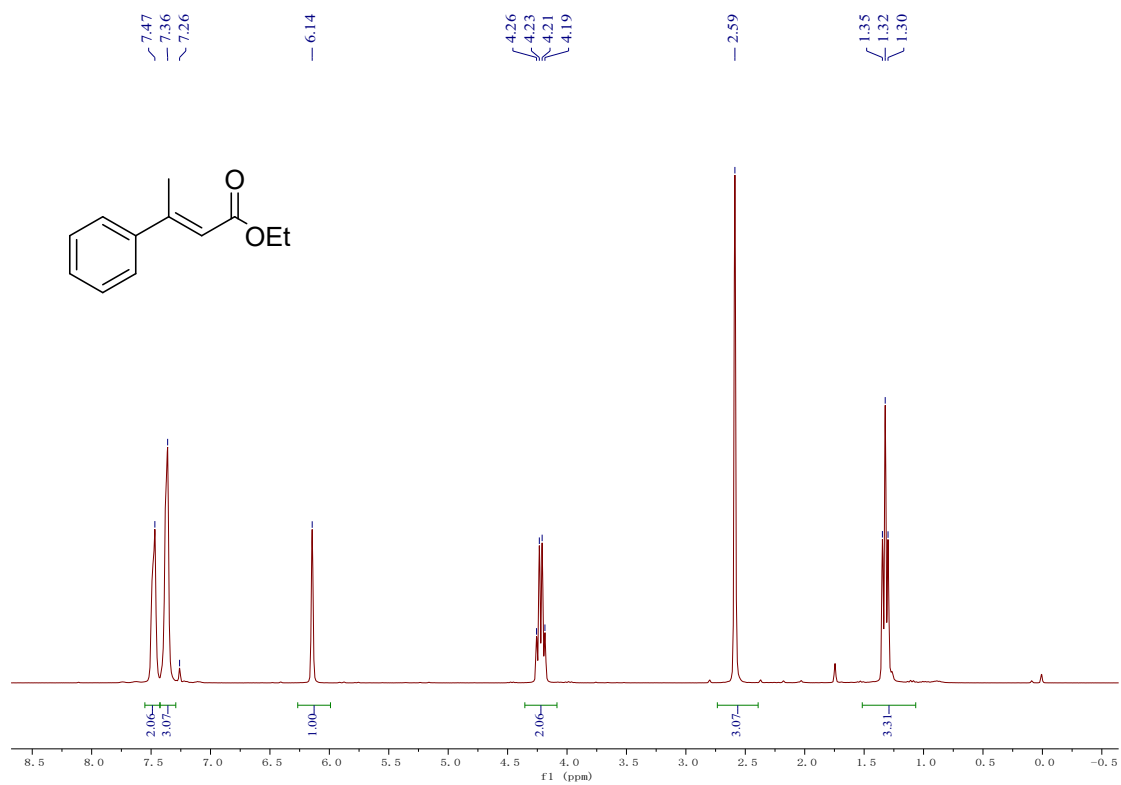



### Compound E-6a <sup>13</sup>C NMR

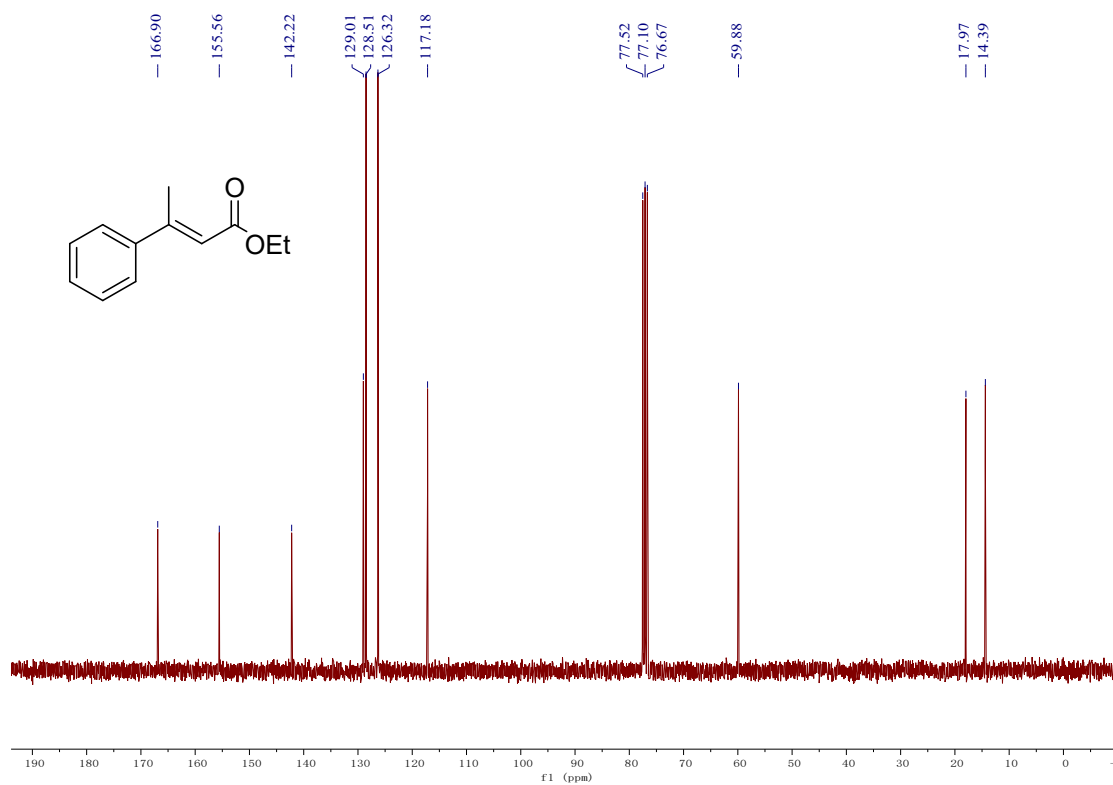

### Compound Z-6a <sup>1</sup>H NMR

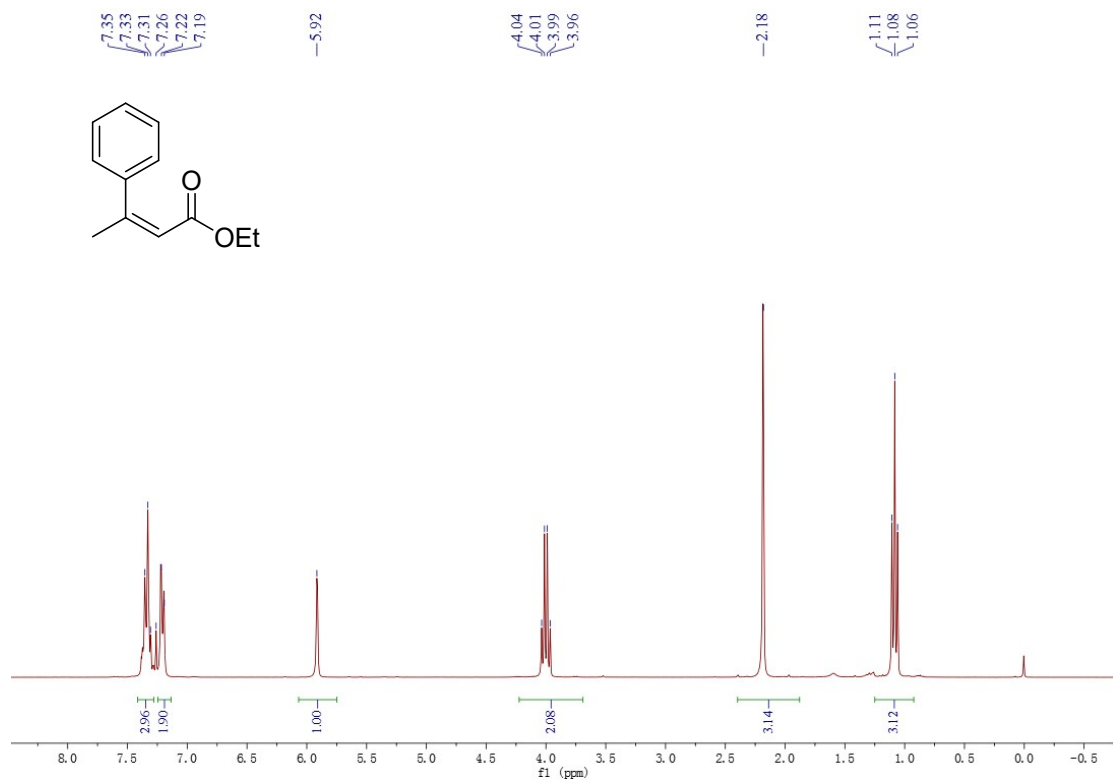

### Compound Z-6a <sup>13</sup>C NMR

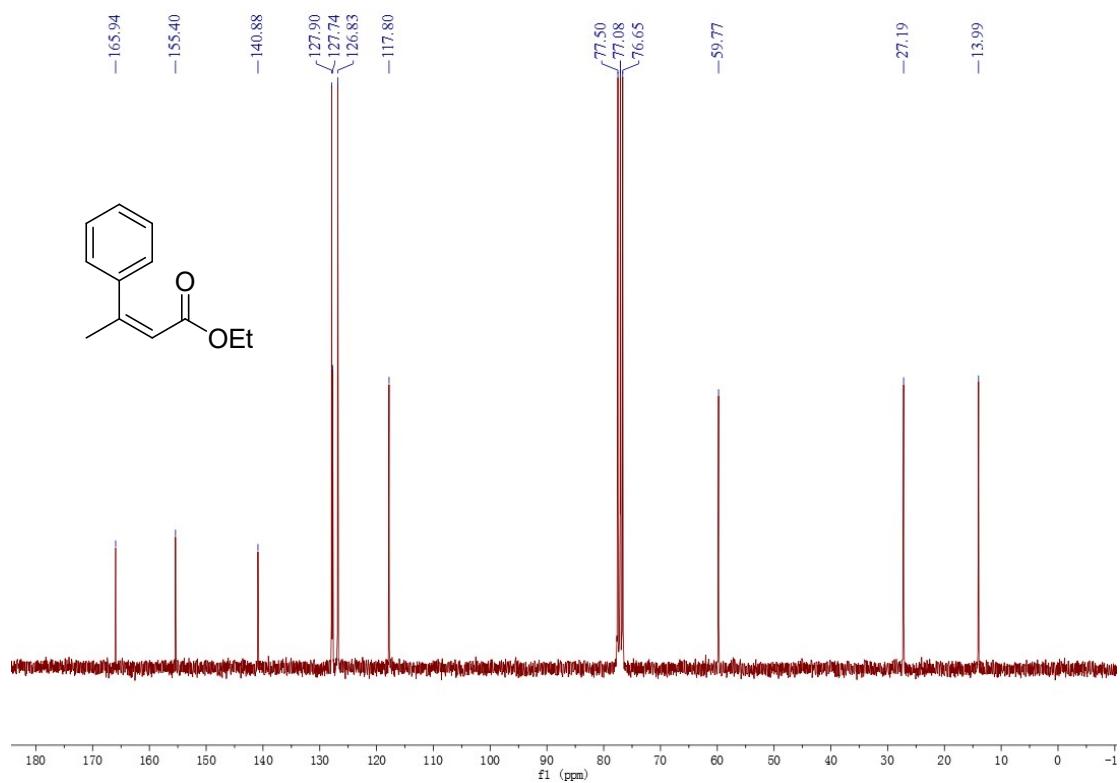

### Compound 6b <sup>1</sup>H NMR

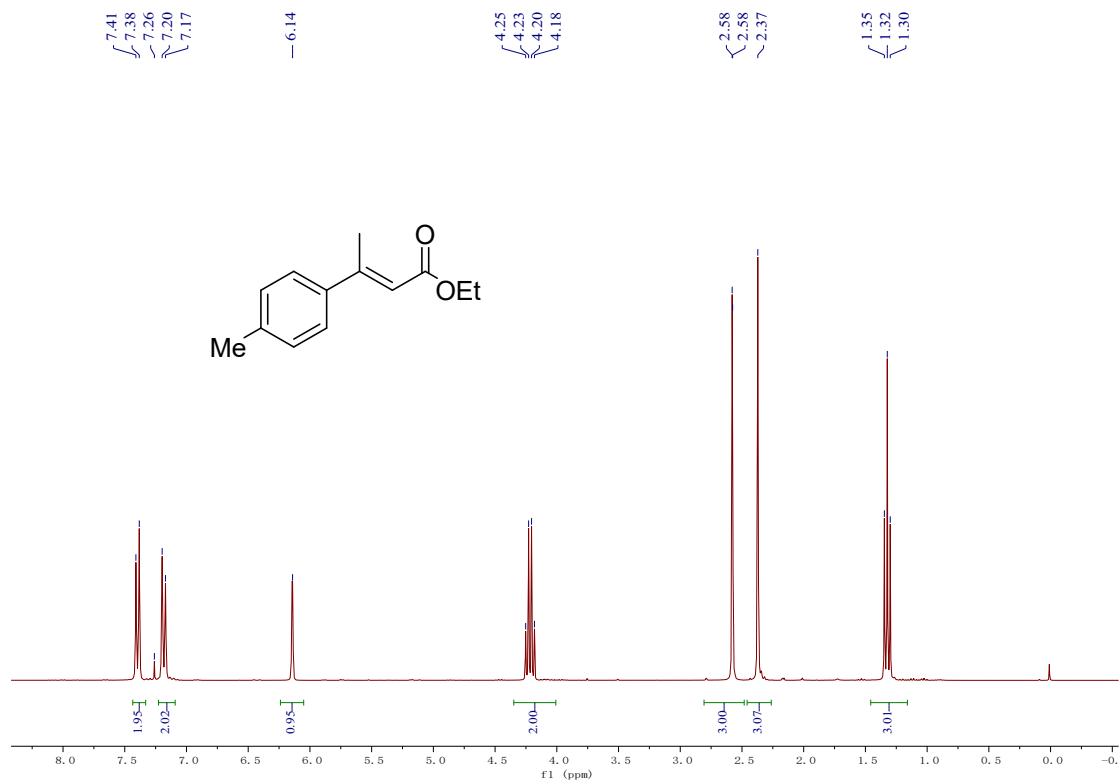

### Compound 6b <sup>13</sup>C NMR

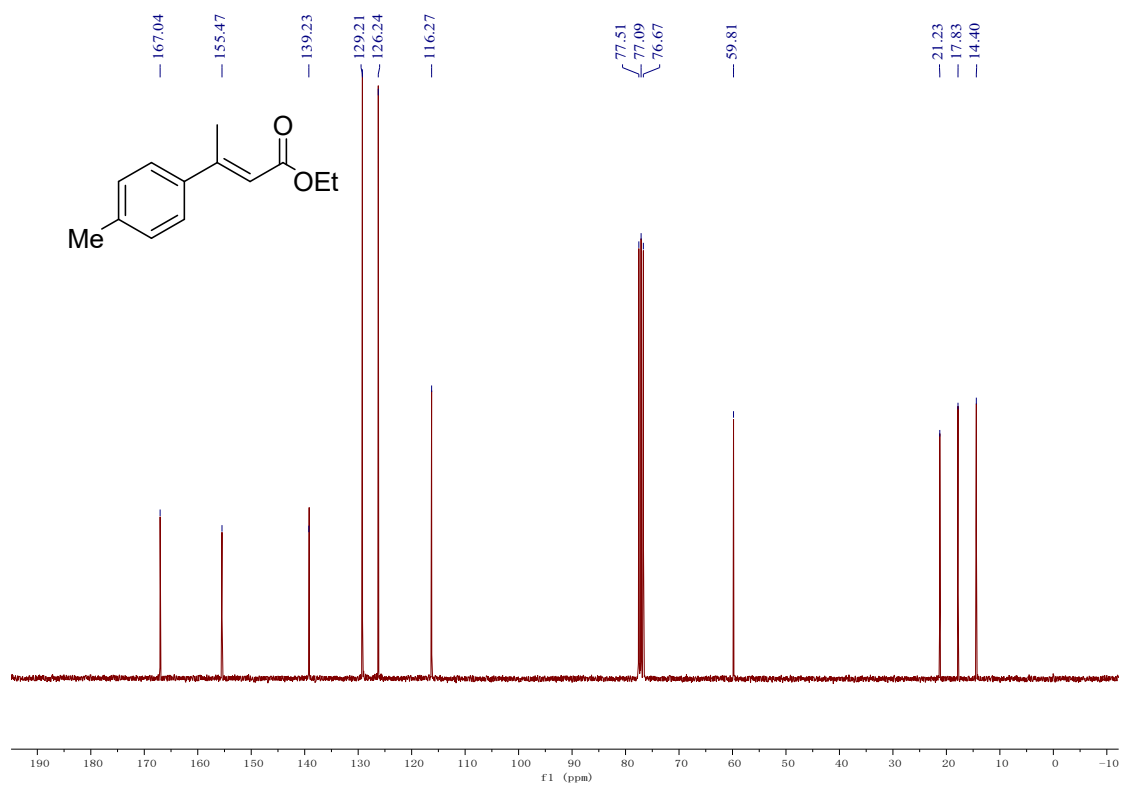

### Compound 6c <sup>1</sup>H NMR

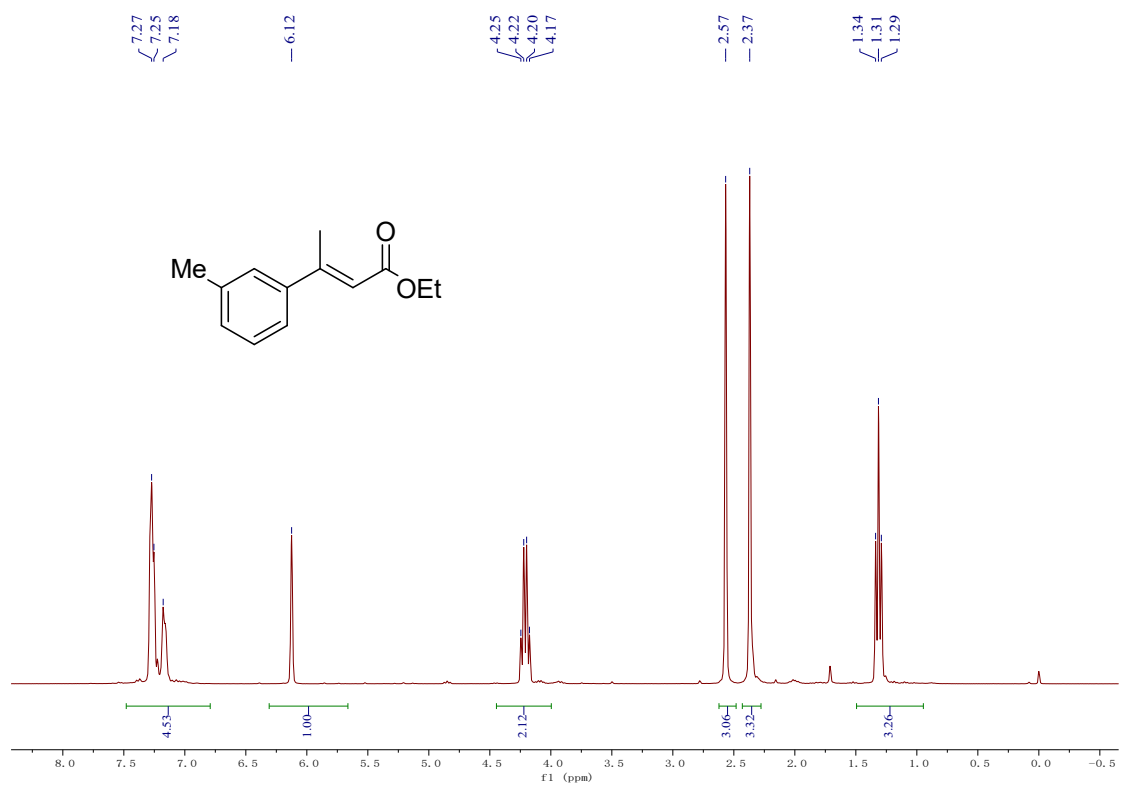

### Compound 6c <sup>13</sup>C NMR

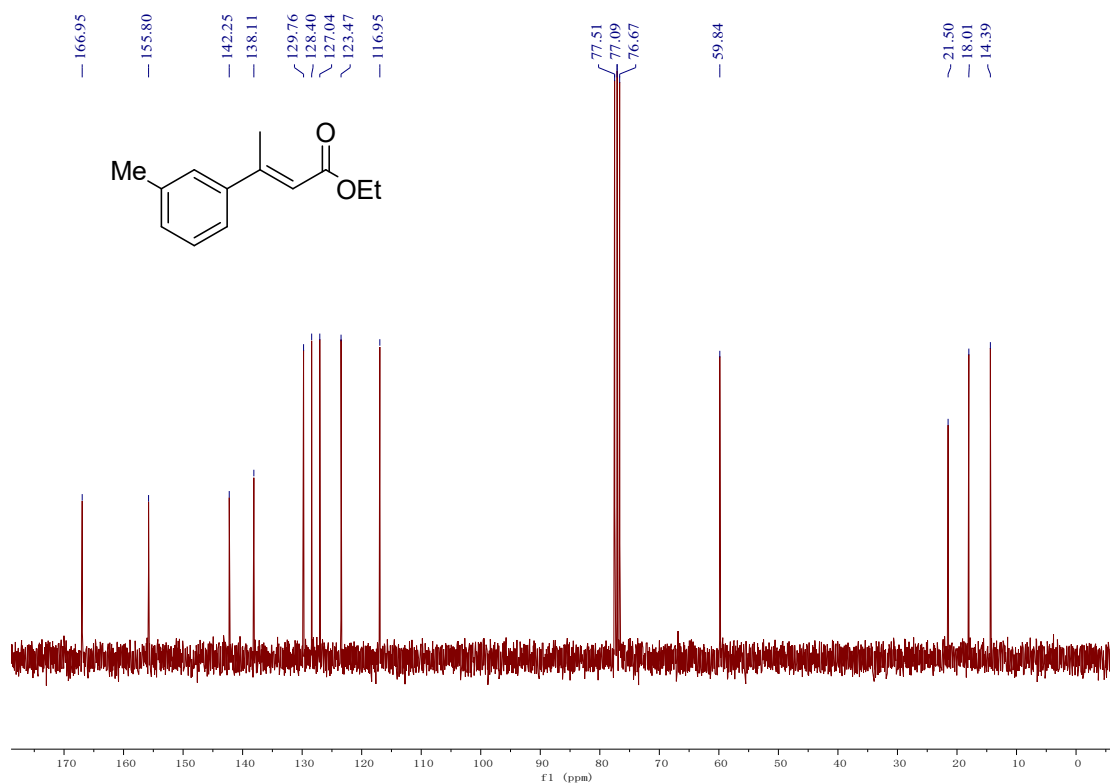

### Compound 6d <sup>1</sup>H NMR

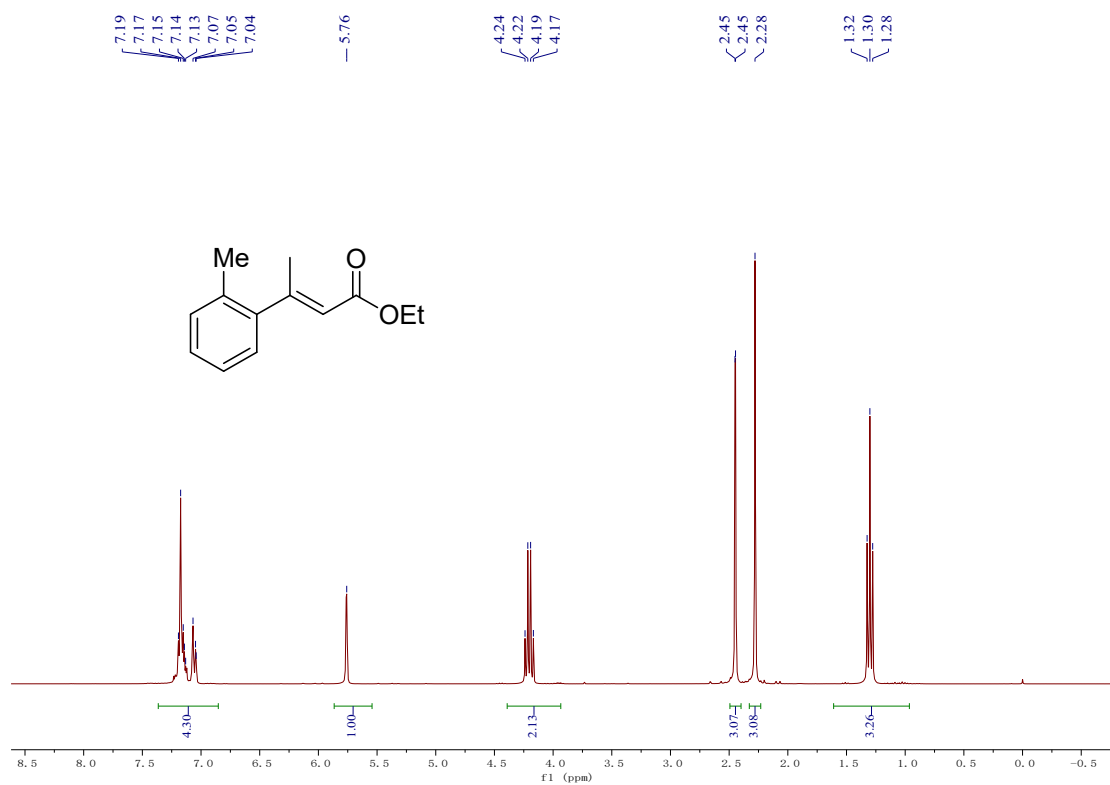

### Compound 6d <sup>13</sup>C NMR

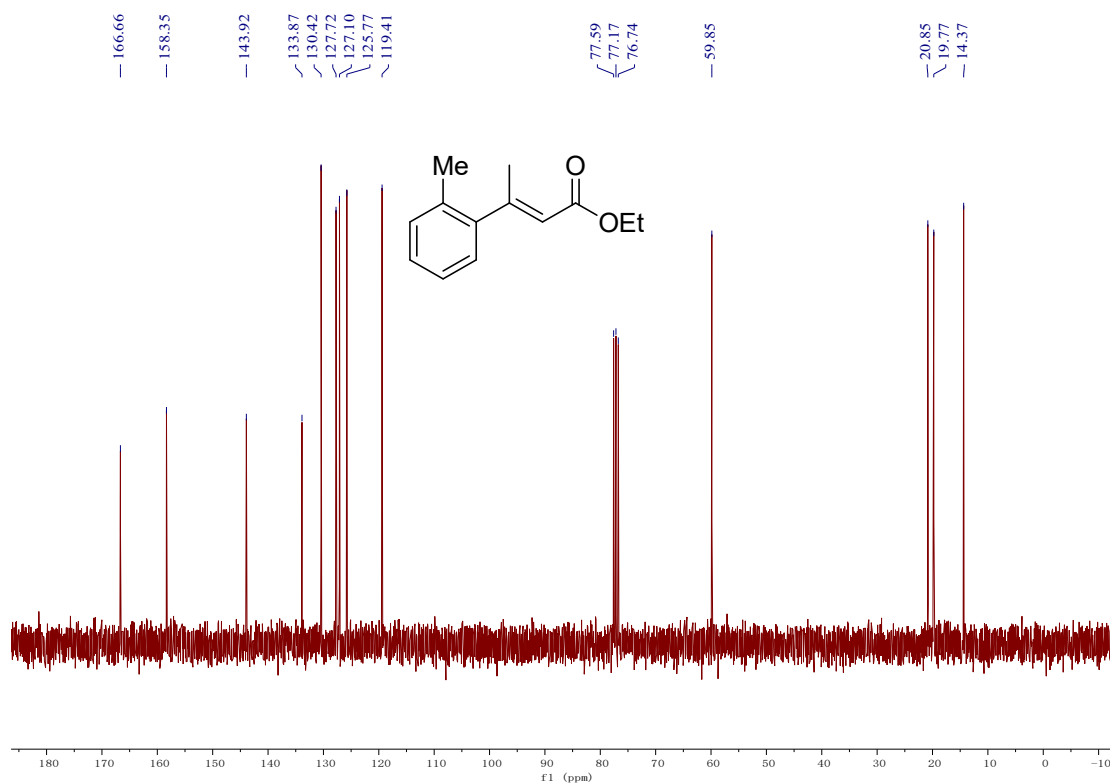

### Compound 6e <sup>1</sup>H NMR

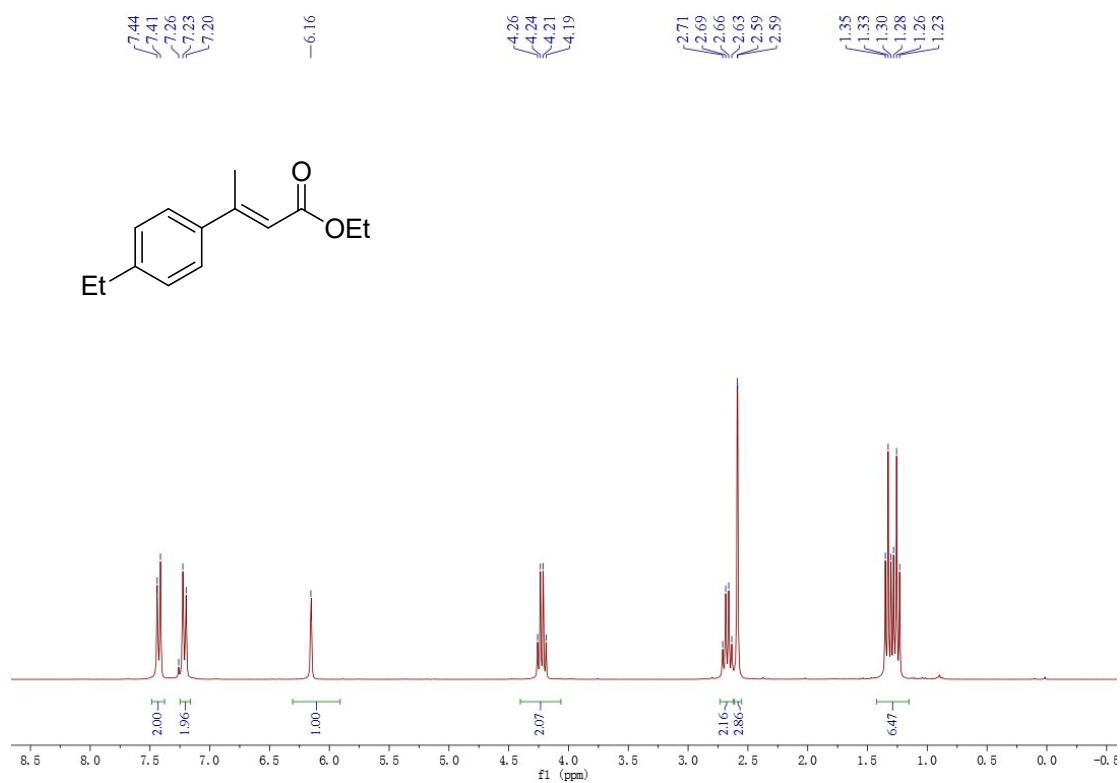

### Compound 6e <sup>13</sup>C NMR

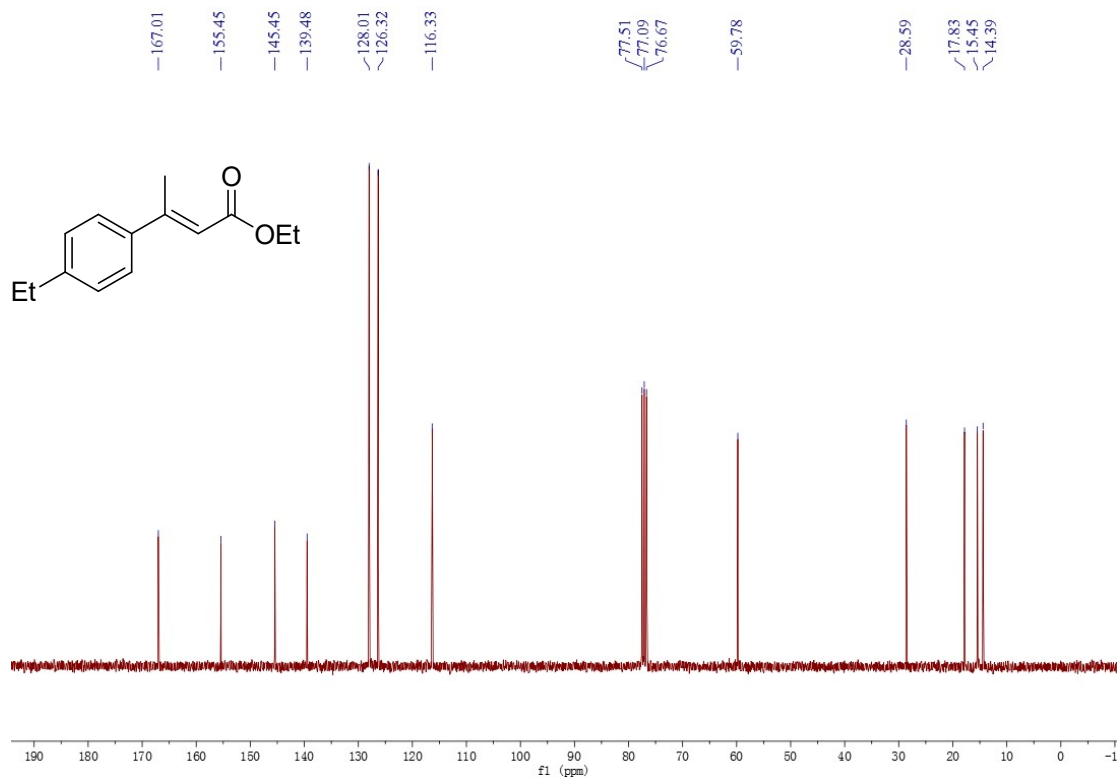

### Compound 6f <sup>1</sup>H NMR

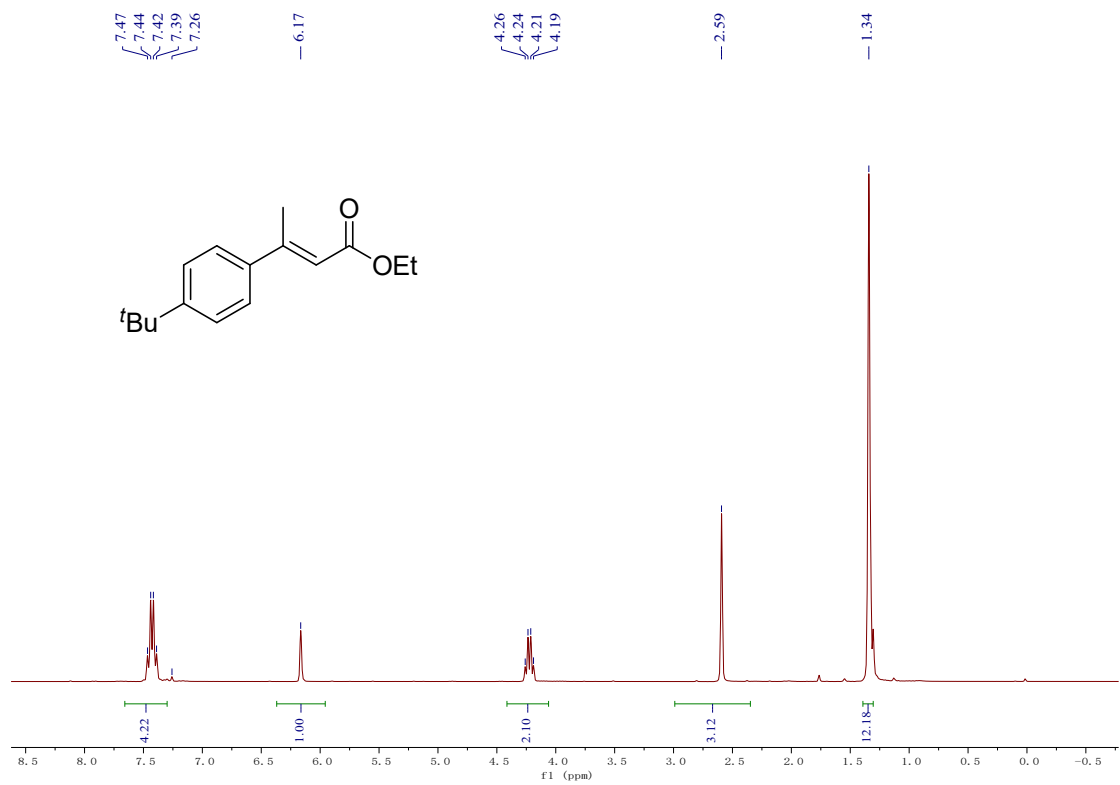

### Compound 6f <sup>13</sup>C NMR

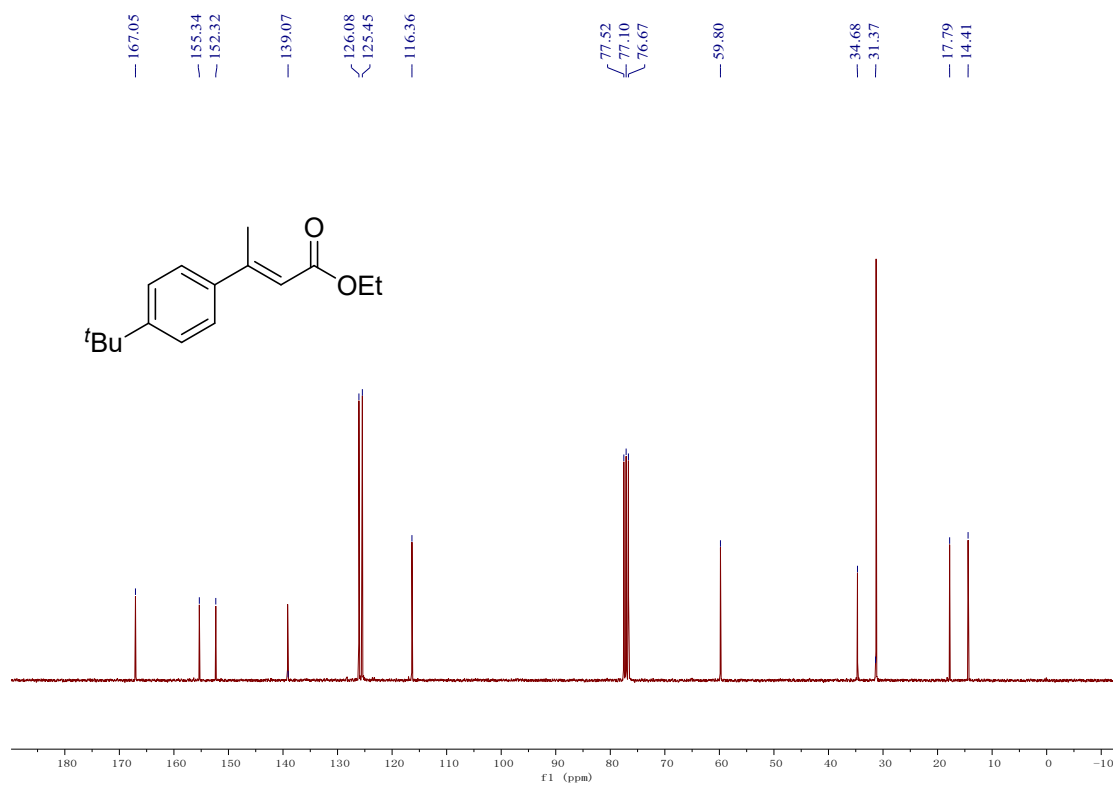

### Compound 6g <sup>1</sup>H NMR

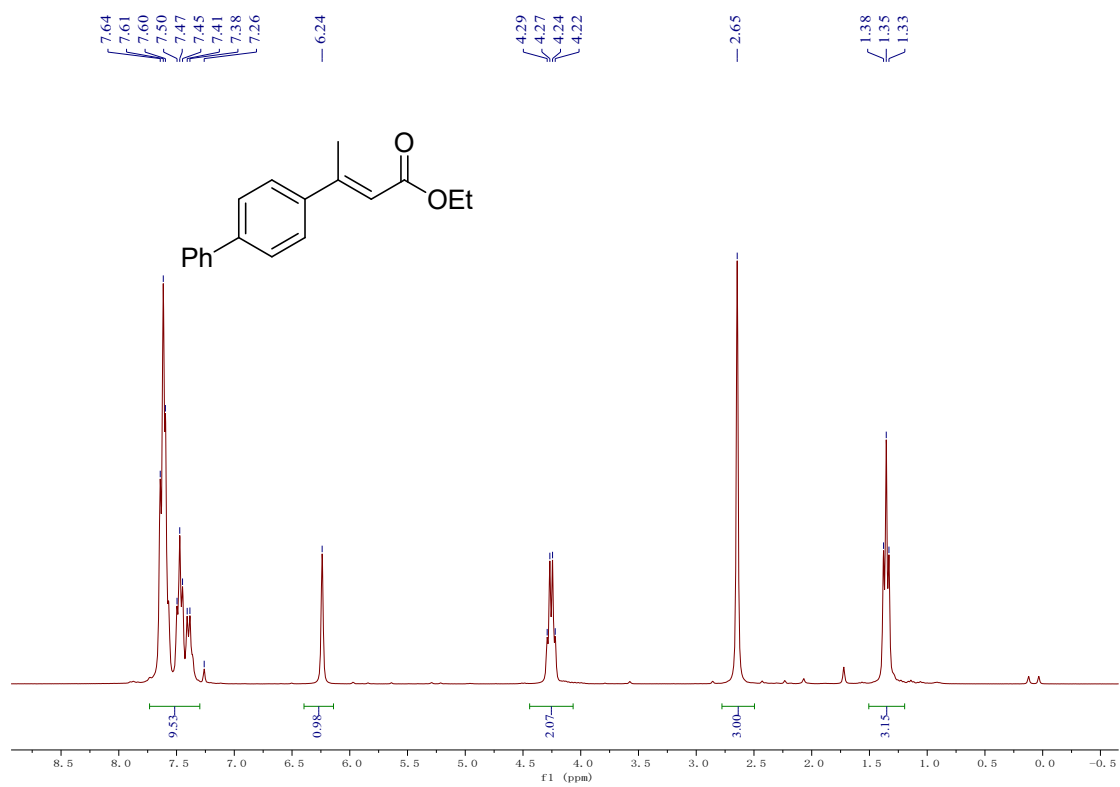

### Compound 6g <sup>13</sup>C NMR

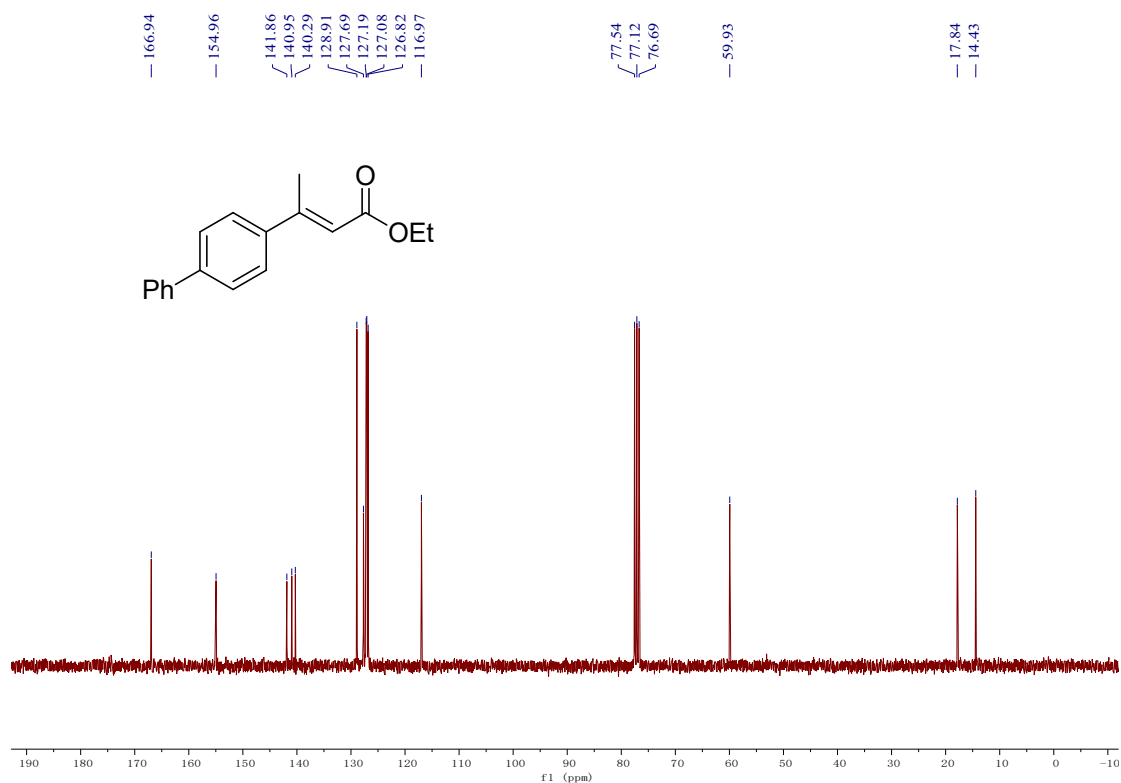

### Compound 6h <sup>1</sup>H NMR

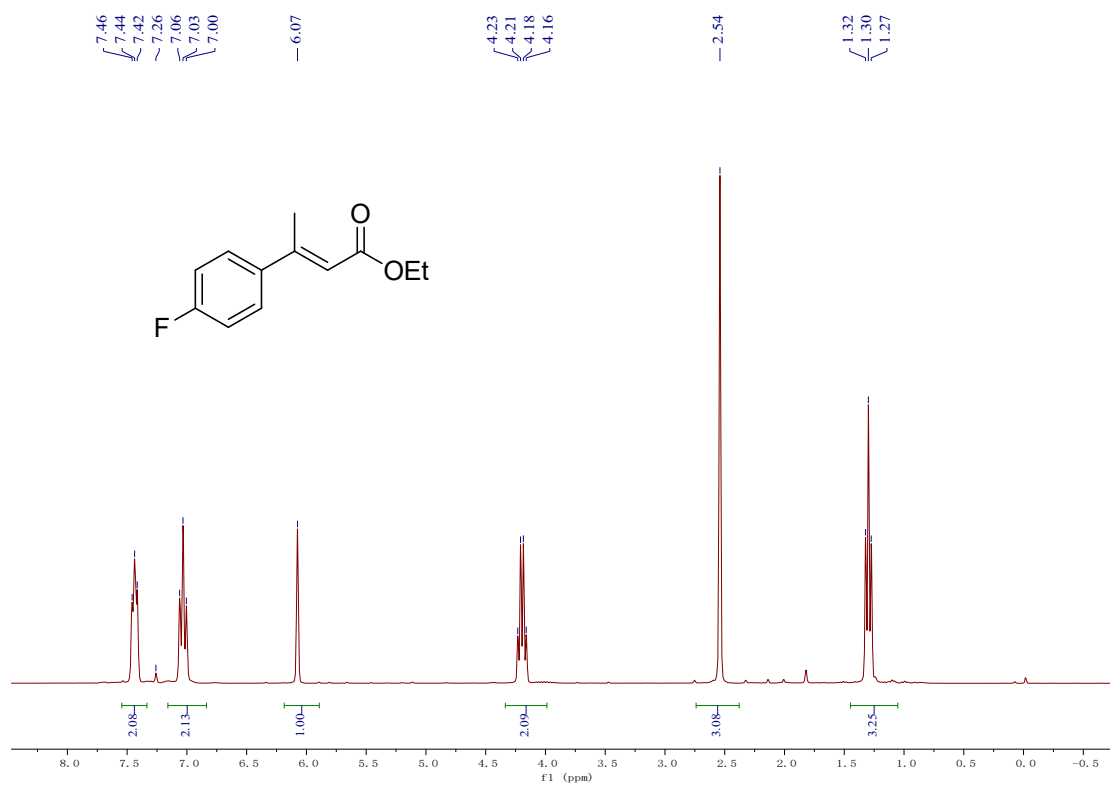



### Compound 6h <sup>13</sup>C NMR

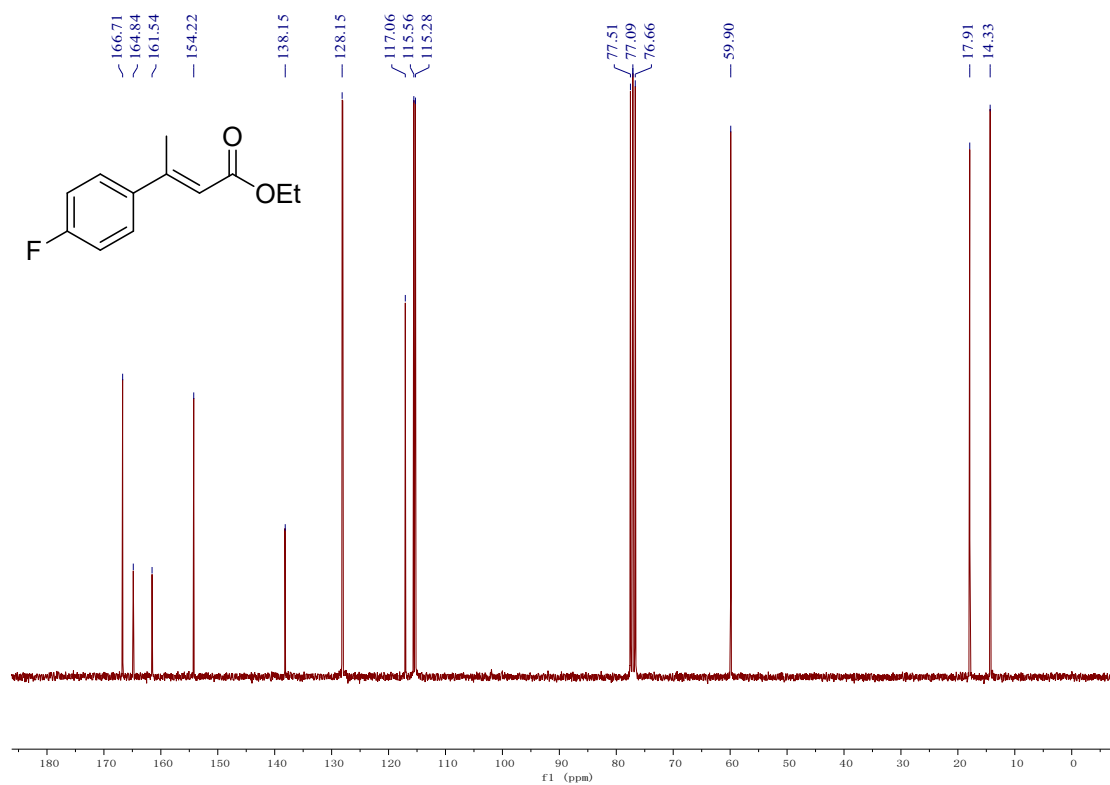

### Compound 6h <sup>19</sup>F NMR

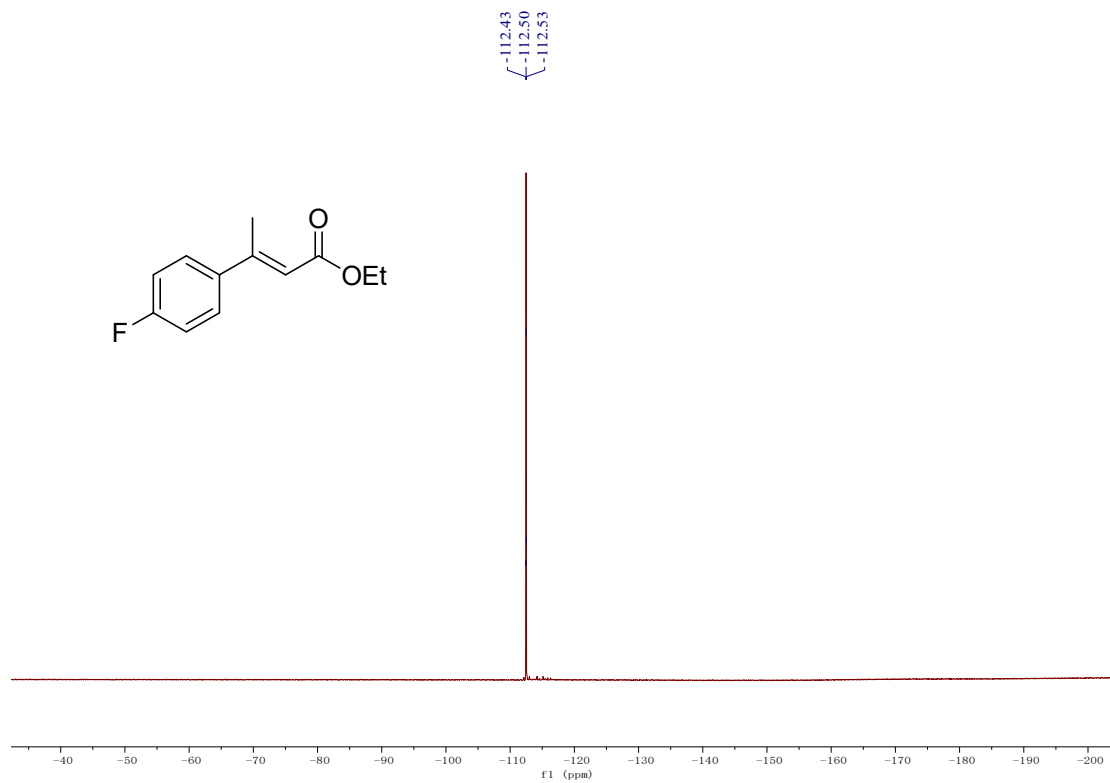

### Compound 6i <sup>1</sup>H NMR

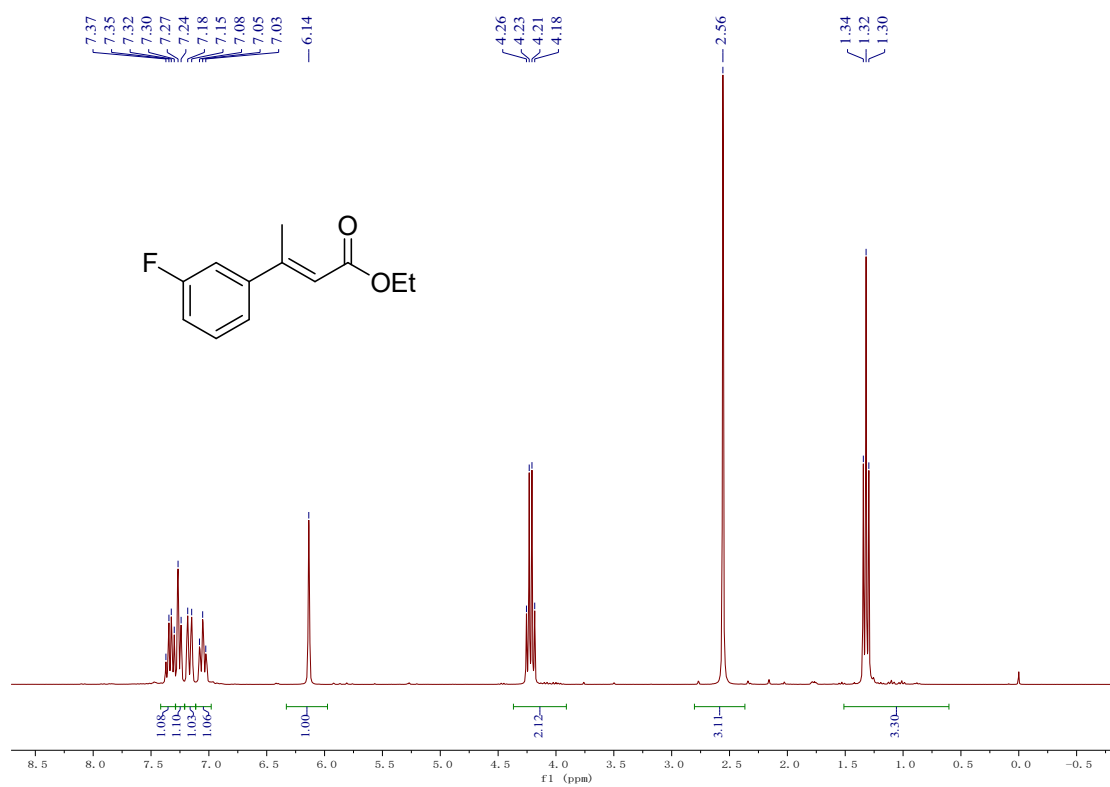

### Compound 6i <sup>13</sup>C NMR

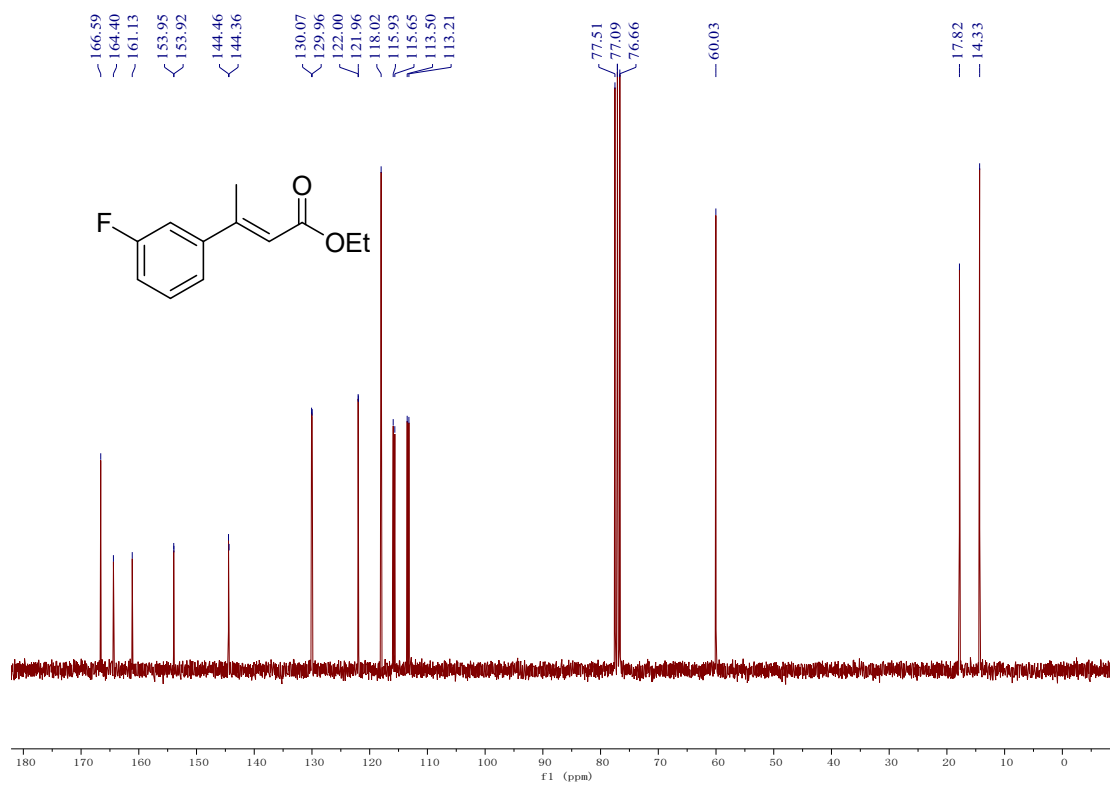

### Compound 6i <sup>19</sup>F NMR

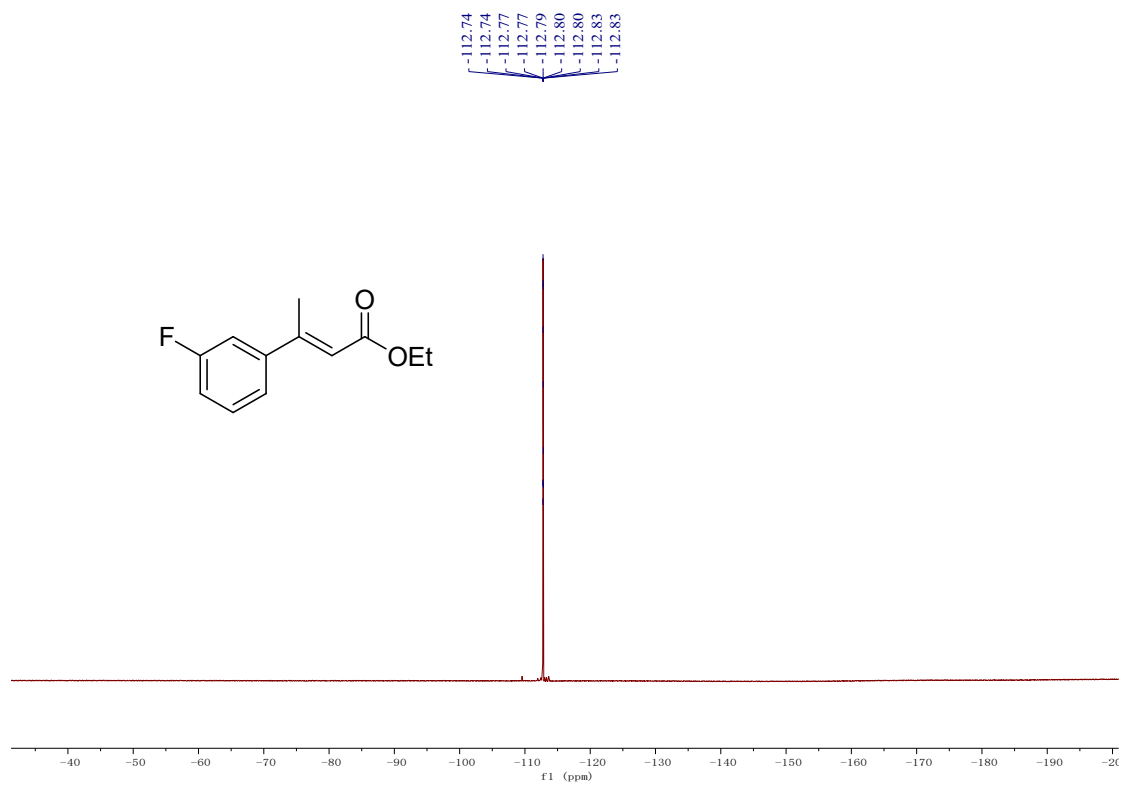

### Compound 6j <sup>1</sup>H NMR

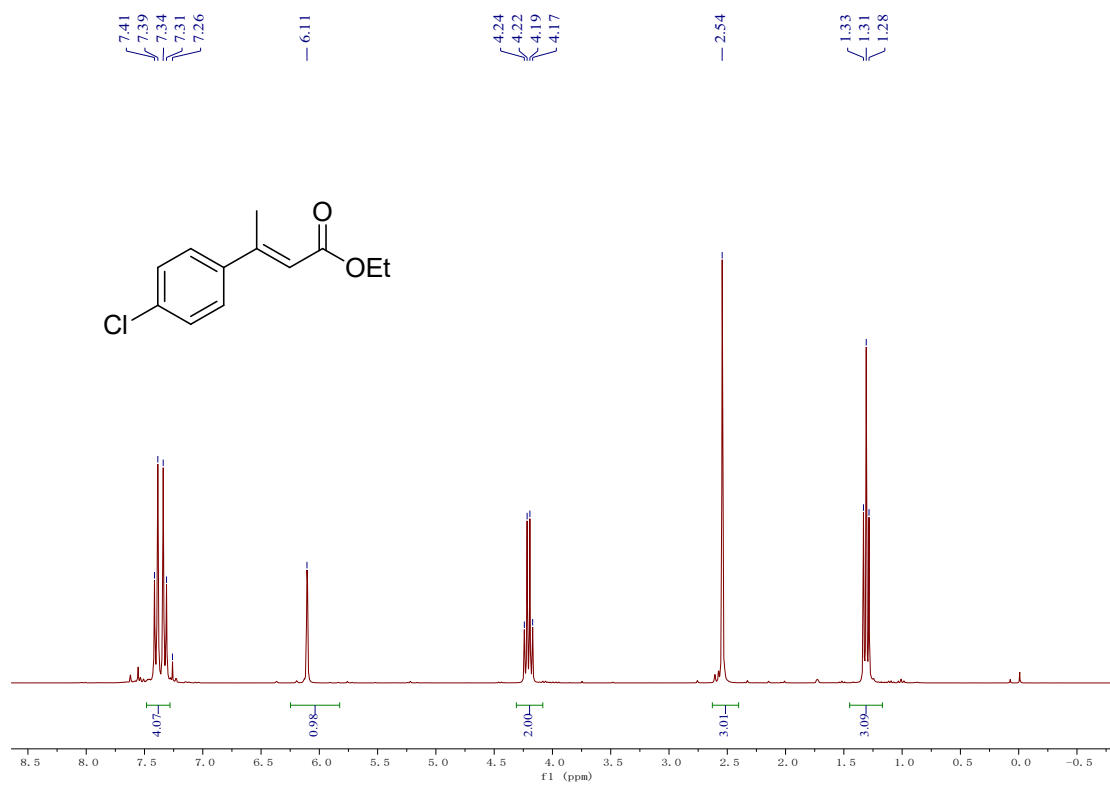

### Compound 6j <sup>13</sup>C NMR

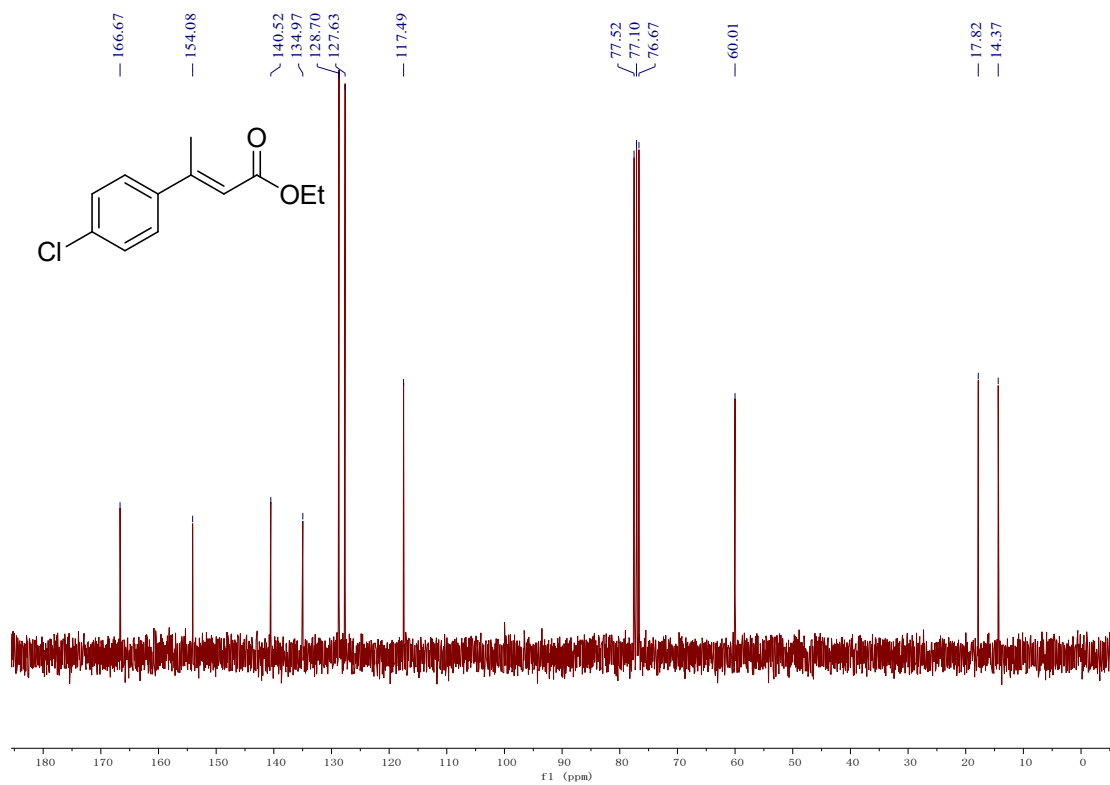

### Compound 6k <sup>1</sup>H NMR

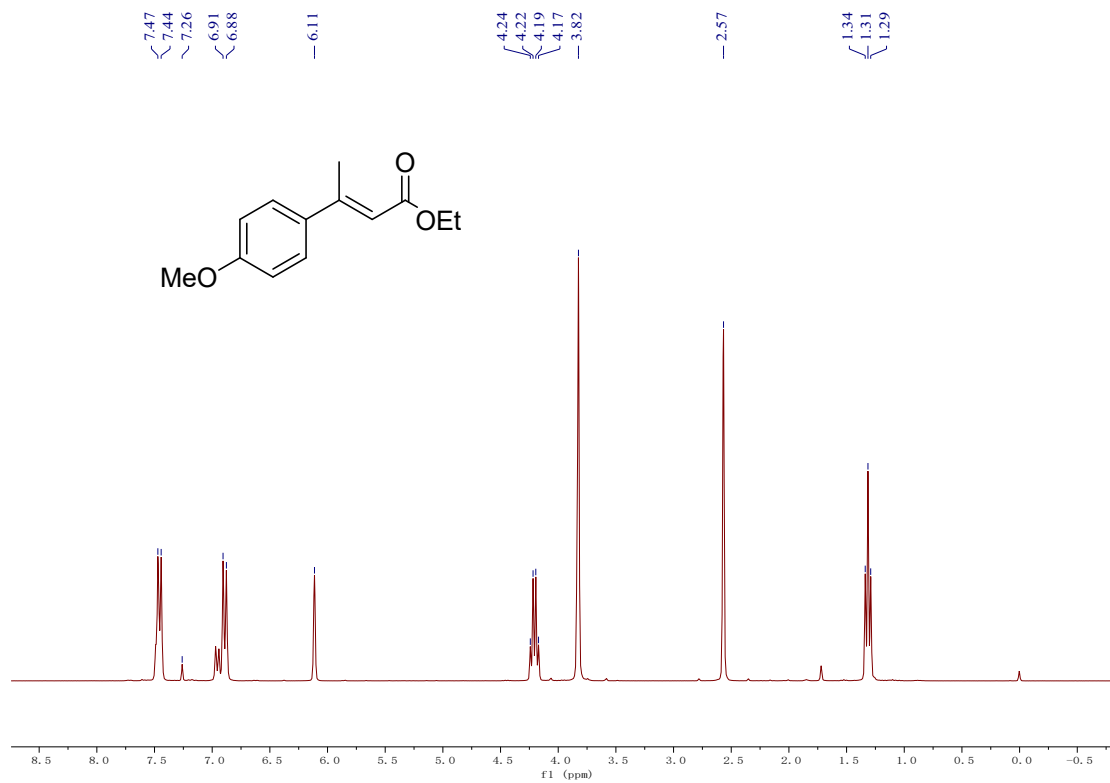

### Compound 6k <sup>13</sup>C NMR

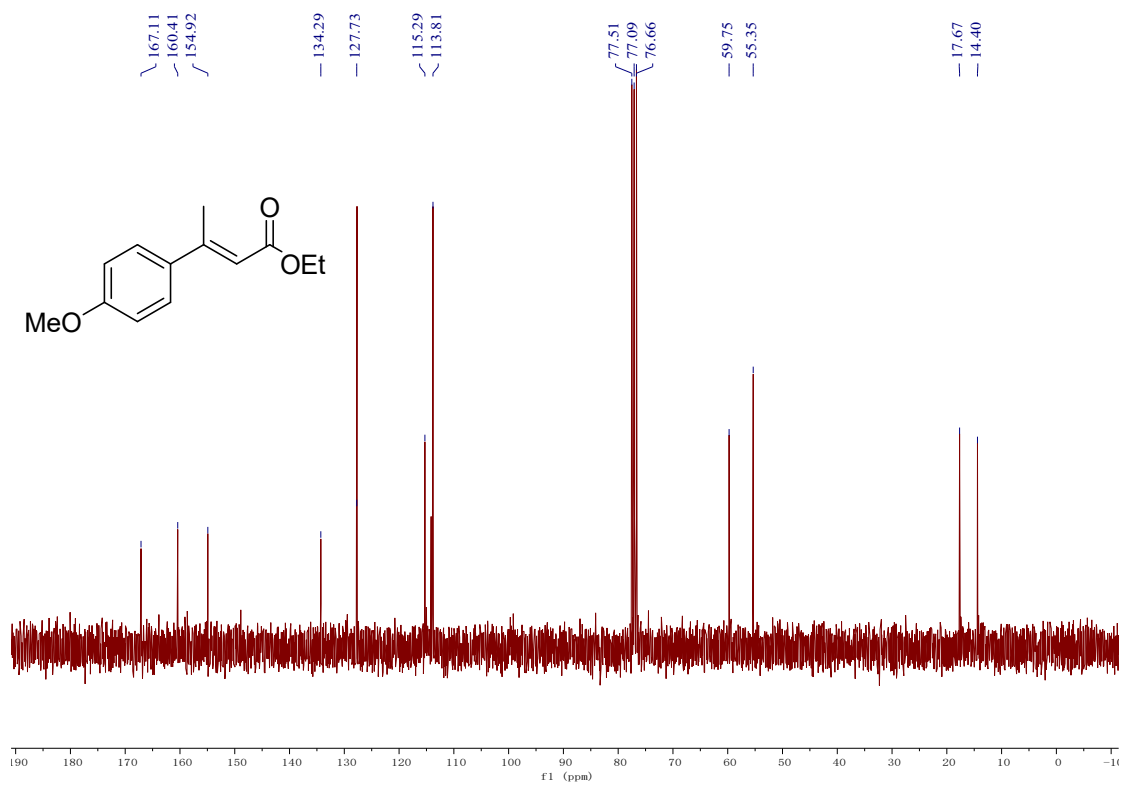

### Compound 6l <sup>1</sup>H NMR

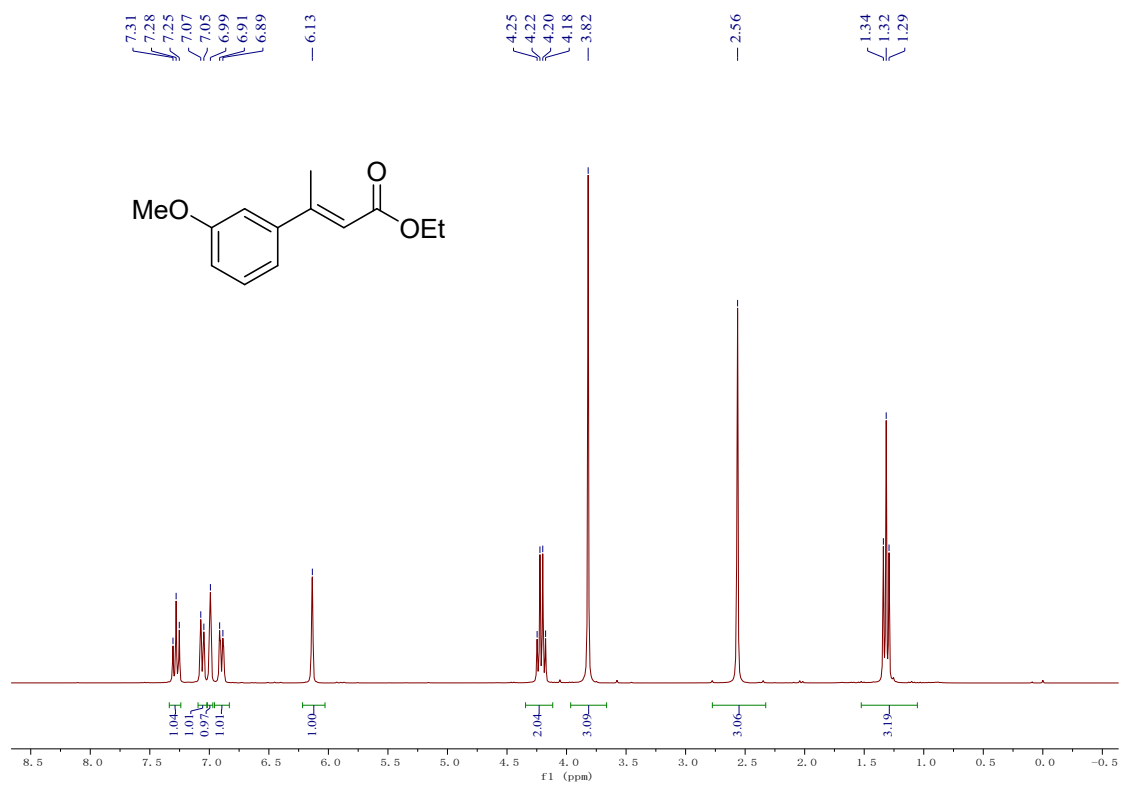

### Compound 6l <sup>13</sup>C NMR

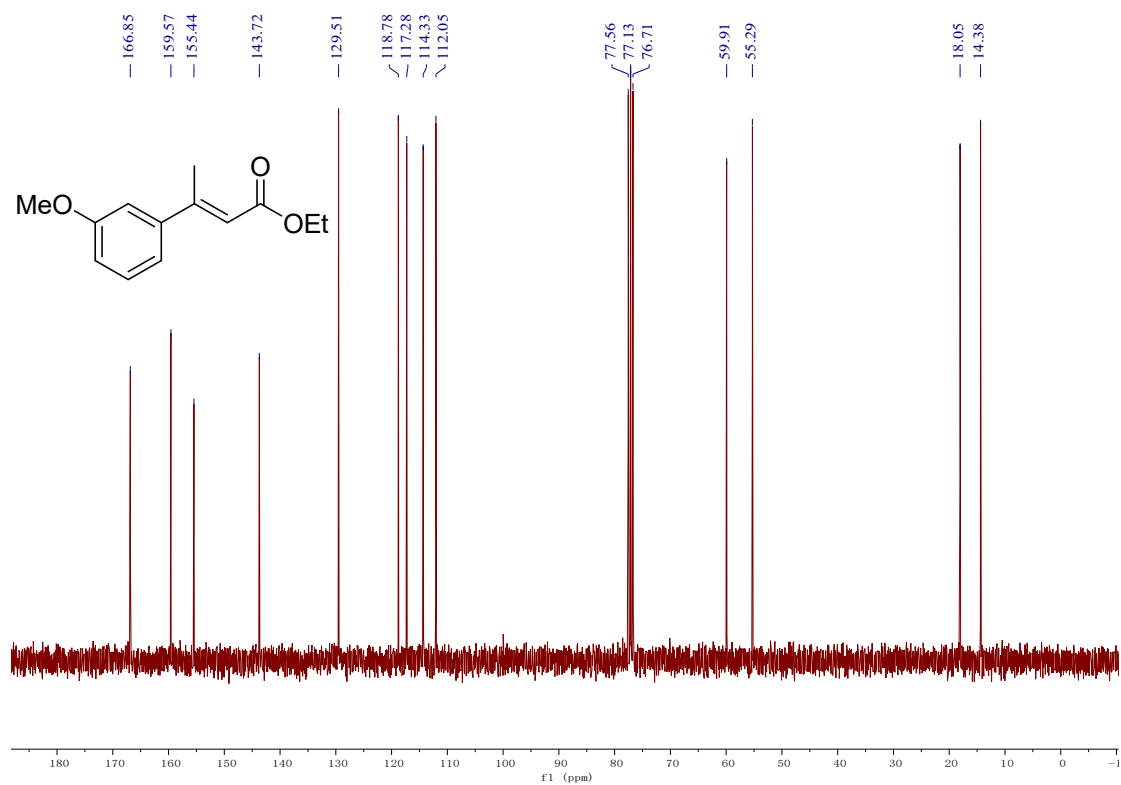

### Compound 6m <sup>1</sup>H NMR

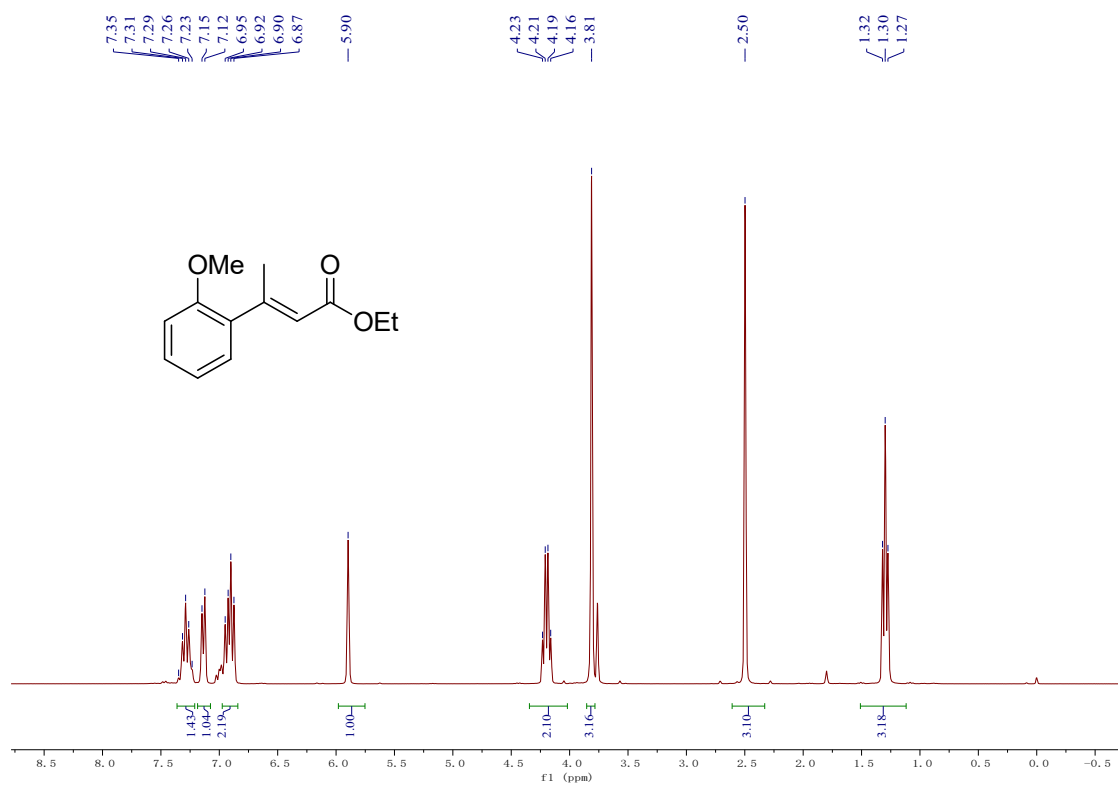

### Compound 6m <sup>13</sup>C NMR

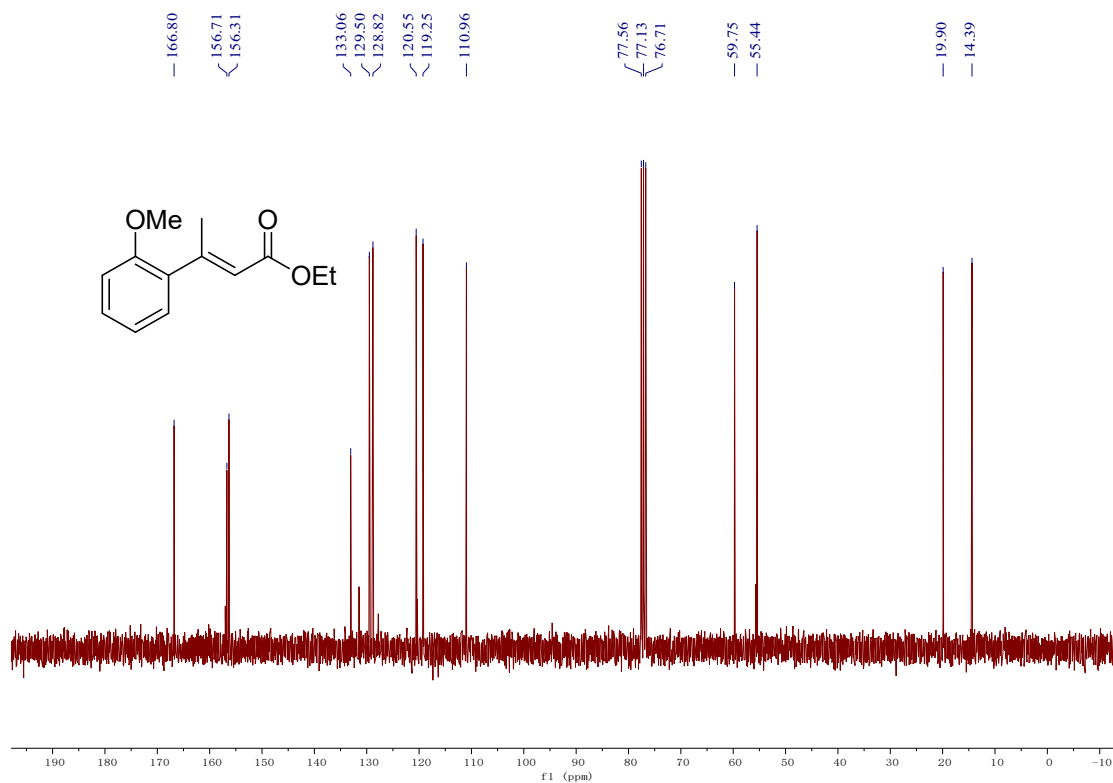

### Compound 6n <sup>1</sup>H NMR

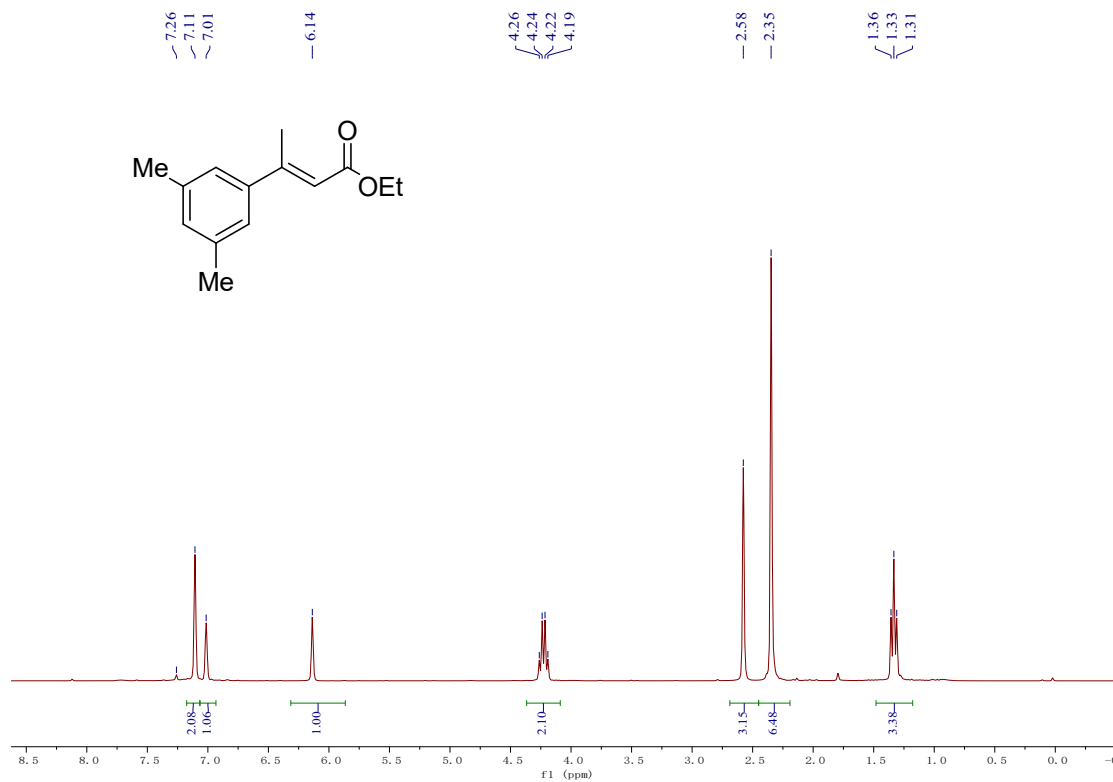

### Compound 6n <sup>13</sup>C NMR

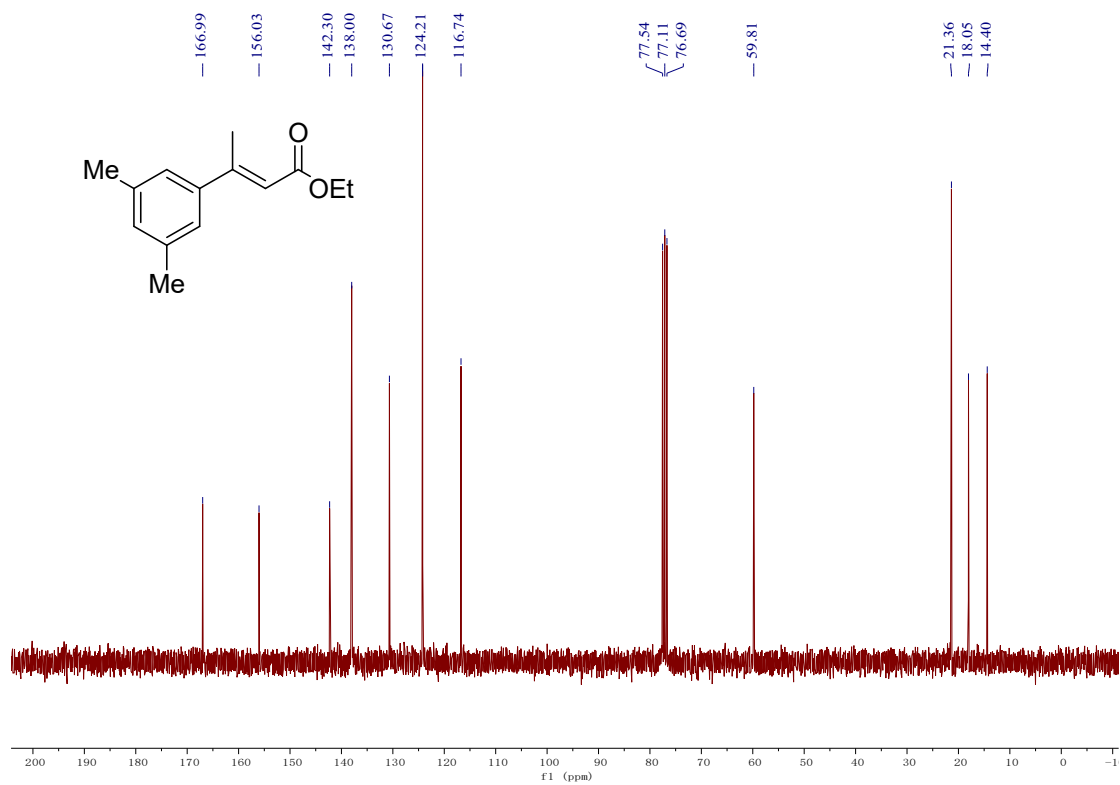

### Compound 6o <sup>1</sup>H NMR

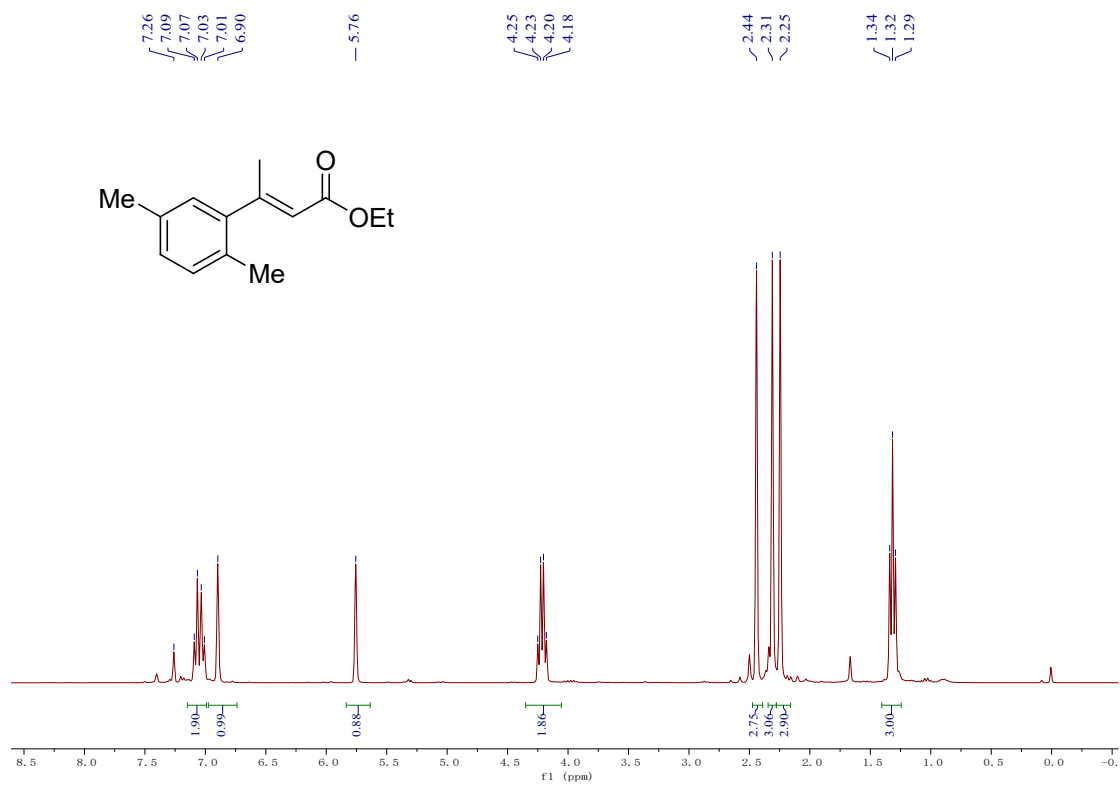



### Compound 6o <sup>13</sup>C NMR

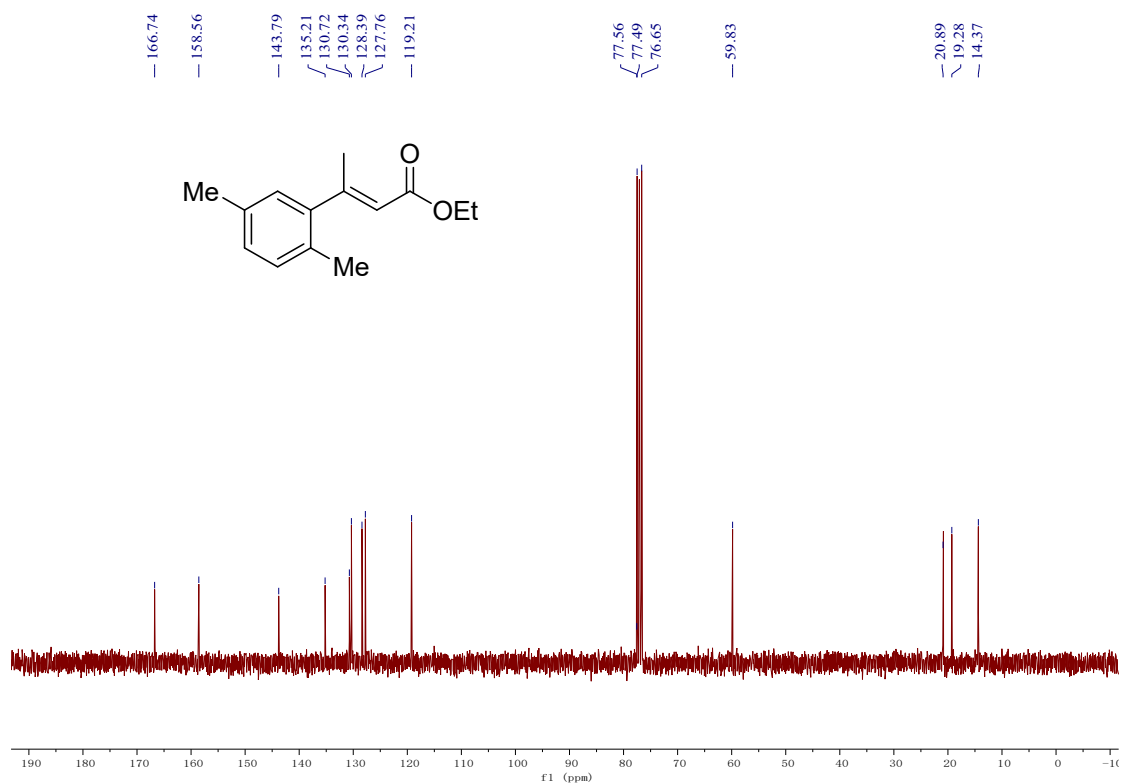

### Compound 6p <sup>1</sup>H NMR

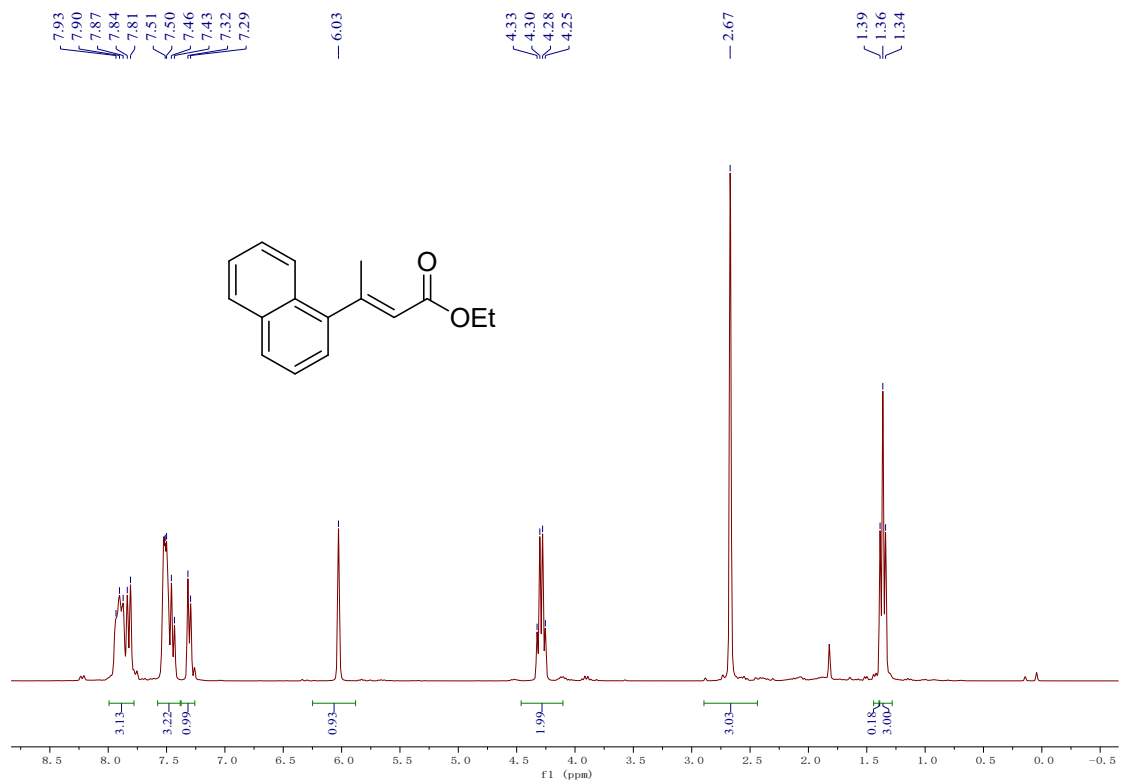

### Compound 6p <sup>13</sup>C NMR

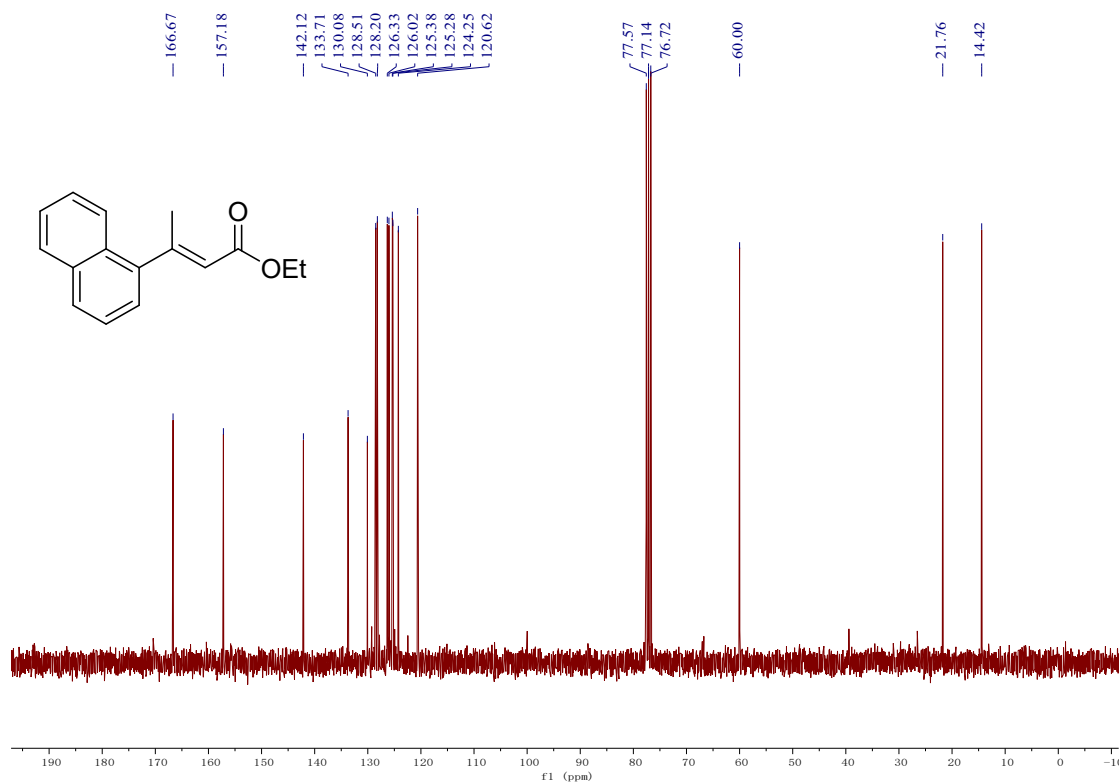

### Compound 6q <sup>1</sup>H NMR

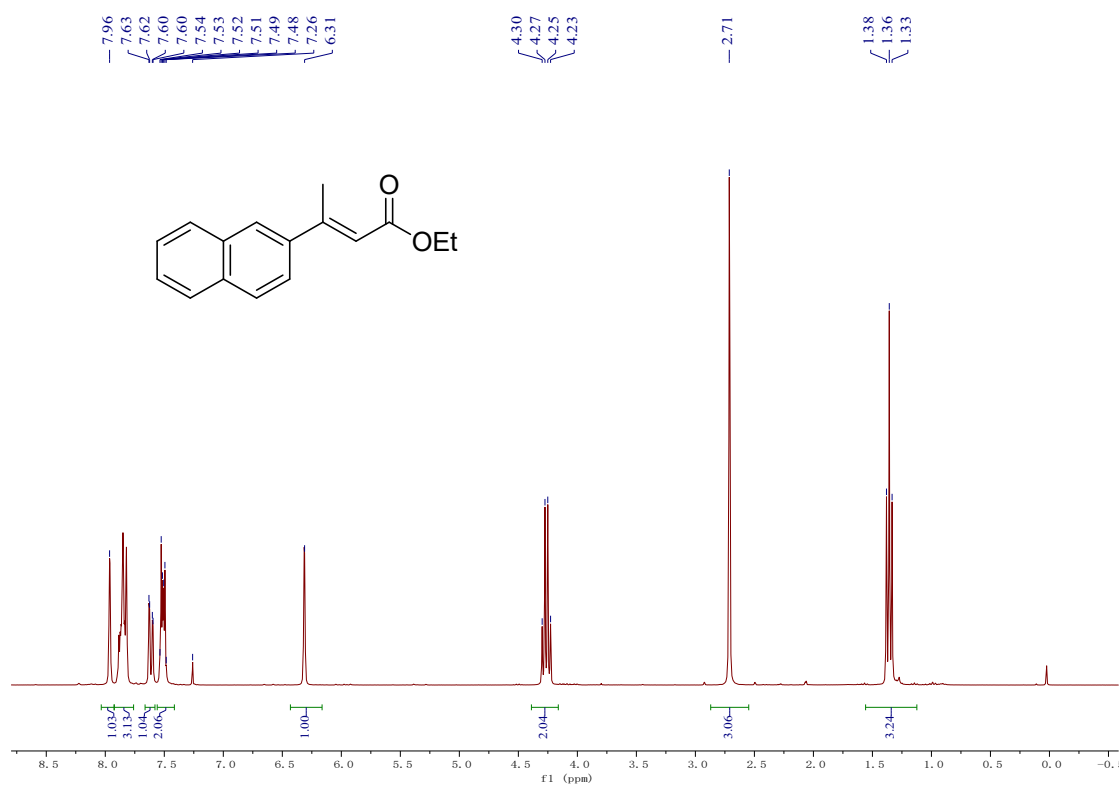

### Compound 6q <sup>13</sup>C NMR

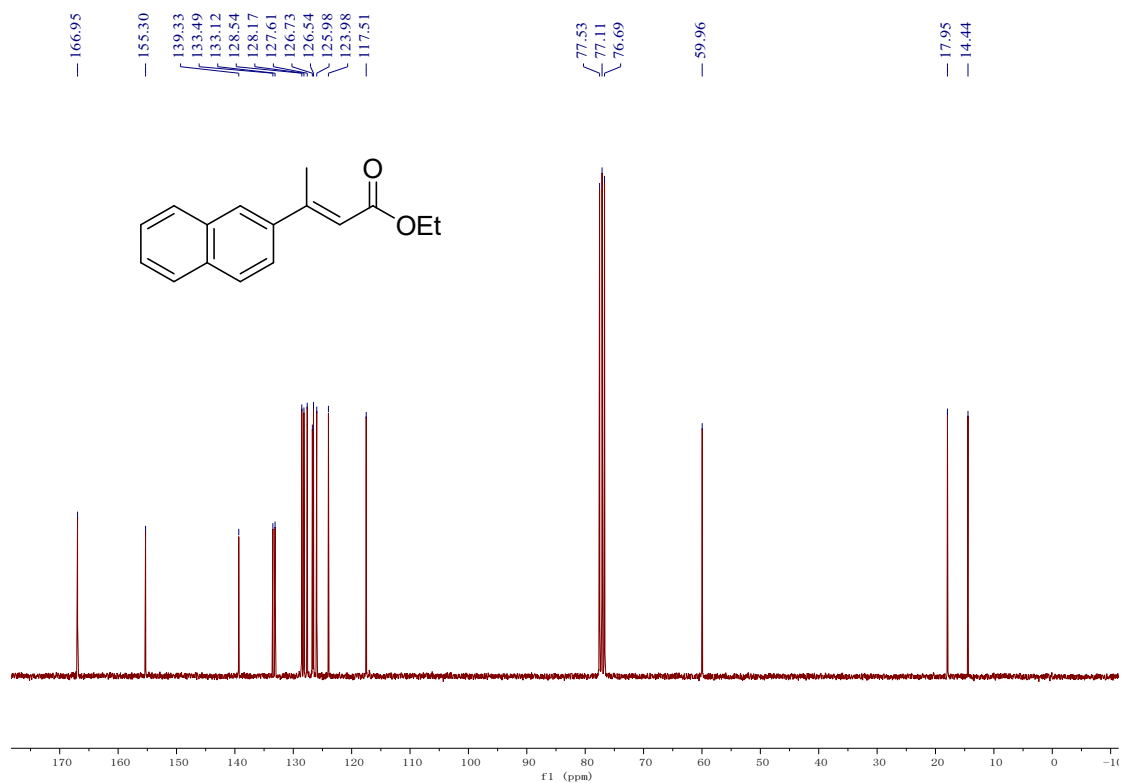

### Compound 6r <sup>1</sup>H NMR

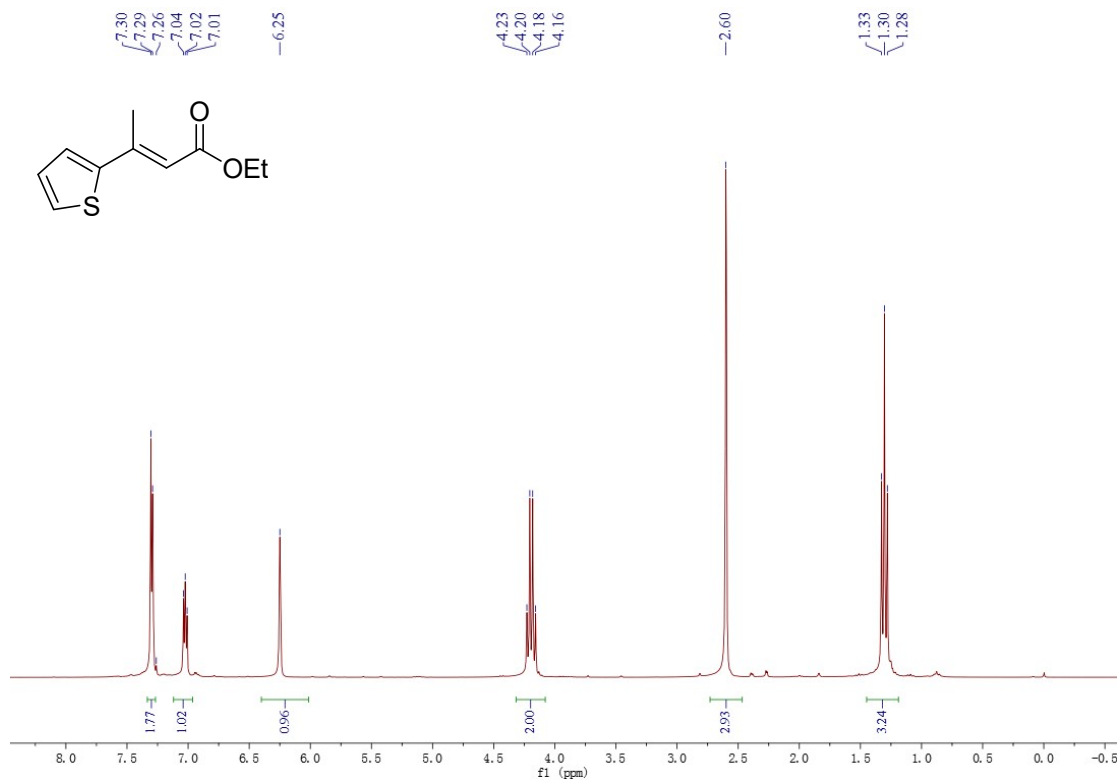

# Compound 6r <sup>13</sup>C NMR

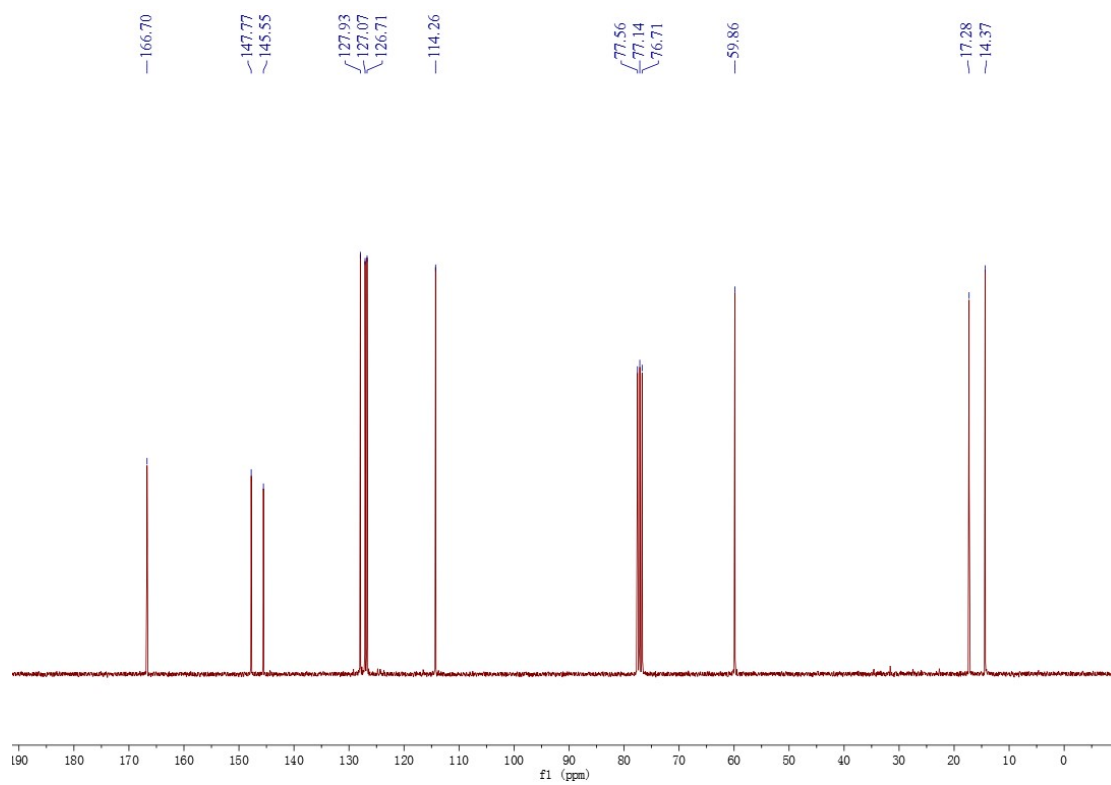

X-ray crystal structure of product **4f**

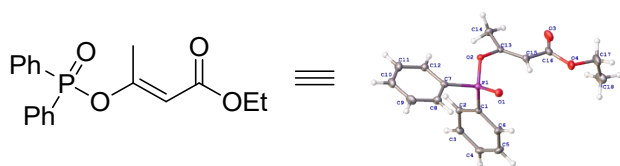

|                                             |                                                               |
|---------------------------------------------|---------------------------------------------------------------|
| Identification code                         | <b>4f</b>                                                     |
| Empirical formula                           | C <sub>18</sub> H <sub>19</sub> O <sub>4</sub> P              |
| Formula weight                              | 330.30                                                        |
| Temperature/K                               | 169.99(10)                                                    |
| Crystal system                              | triclinic                                                     |
| Space group                                 | P-1                                                           |
| a/Å                                         | 6.1976(8)                                                     |
| b/Å                                         | 12.1637(13)                                                   |
| c/Å                                         | 12.6520(13)                                                   |
| α/°                                         | 107.828(9)                                                    |
| β/°                                         | 102.923(10)                                                   |
| γ/°                                         | 104.503(11)                                                   |
| Volume/Å <sup>3</sup>                       | 831.07(18)                                                    |
| Z                                           | 2                                                             |
| ρ <sub>calc</sub> /cm <sup>3</sup>          | 1.320                                                         |
| μ/mm <sup>-1</sup>                          | 1.619                                                         |
| F(000)                                      | 348.0                                                         |
| Crystal size/mm <sup>3</sup>                | 0.15 × 0.13 × 0.11                                            |
| Radiation                                   | Cu Kα (λ = 1.54184)                                           |
| 2θ range for data collection/°              | 7.764 to 133.2                                                |
| Index ranges                                | -7 ≤ h ≤ 5, -14 ≤ k ≤ 14, -15 ≤ l ≤ 15                        |
| Reflections collected                       | 5688                                                          |
| Independent reflections                     | 2912 [R <sub>int</sub> = 0.0988, R <sub>sigma</sub> = 0.0746] |
| Data/restraints/parameters                  | 2912/0/210                                                    |
| Goodness-of-fit on F <sup>2</sup>           | 1.113                                                         |
| Final R indexes [I ≥ 2σ (I)]                | R <sub>1</sub> = 0.0931, wR <sub>2</sub> = 0.2526             |
| Final R indexes [all data]                  | R <sub>1</sub> = 0.1060, wR <sub>2</sub> = 0.2603             |
| Largest diff. peak/hole / e Å <sup>-3</sup> | 0.81/-0.74                                                    |
